# Supplementary material for: Plant Salinity Tolerance Conferred by Arbuscular Mycorrhizal Fungi and Associated Mechanisms: A Meta-Analysis
Source: Front Plant Sci. 2020 Dec 9;11:588550. doi: 10.3389/fpls.2020.588550 (PMC7755987; doi:10.3389/fpls.2020.588550)
Supplement: Supplementary Table 2 — Metadata obtained and used for analyses in the current study. [file Table_2.XLSX]

## Sheet: Instructions
	#Instructions on using the sheets.
	There are 24 excel sheets (including this instruction sheet)
	This sheet contains instruction on how to read other 23 sheets
	Abbreviations used						Description of column head in each sheet
	Sheet No	Abbreviation	Elaboration				Column	Column Head	Column Head Descriptionm
	2	SDB	Shoot Dry Mass				Column A	PaperNo.	Serial number of the paper used for data extraction as mentioned in ST1
	3	RDB	Root Dry Mass				Column B	Study SL	Serial number of the observation for the the trait
	4	PH	Plant Height				Column C	Author	Name of Lead author of the paper
	5	Car	Carotenoid				Column D	Year	Year of publication of the paper
	6	CAT	Catalase				Column E	Salinity_level	Level of salinity (See details in the material and methods)
	7	EC	Electrolycic Conductivity				Column F	Mycorrhiza_Species	Species name of the fungus inoculated
	8	H2O2	Hydrogen Peroxide				Column G	Mycorrhiza_Genera	The genera name in which the fungus belong
	9	RWC	Relative Water Content				Column H	Plant_Species	Species name of the plant host
	10	MDA	Malondialdehyde				Column I	Plant_Family	THe Family name in which the host belong
	11	POD	Peroxidase				Column J	Plant_Life_Styles	Plant Life Styles
	12	SOD	Superoxide				Column K	Plant_Lifecycle	Plant Lifecycle
	13	Proline	Proline				Column L	Plant_Life_Forms	Plant LifeForms
	14	SS	Soluble Sugar				Column M	Plant_Clade	Plant Clade
	15	Ca	Calcium				Column N	Salinity_duration	Salinity duration
	16	K	Potassium				Column O	C3_C4	Plant Photosynthetic behaviour
	17	Na	Sodium				Column P	Nodulation	Plant nodulation ability with nodulating bacteria
	18	P	Phosphorus				Column Q	Ne	Number of replication for the treatment
	19	N	Nitrogen				Column R	Nc	Number of replication for the control
	20	Chla	Chlorophyll-a				Column S	Me	Mean value of the trait for treatment group
	21	Chlb	Chlorophyll-b				Column T	Se	Standard daviation of the trait for treatment group
	22	FvFm	Maximum Photochemical Efficiency				Column U	Mc	Mean value of the trait for control group
	23	Pn	Photosynthetic rate				Column V	Sc	Standard daviation of the trait for control group
	24	Gs	Stomatal Conductance

## Sheet: SDB
PaperNo.	Study SL	Author	Year	Salinity_level	Mycorrhiza_Species	Mycorrhiza_Genera	Plant_Species	Plant_Family	Plant_Life_Styles	Plant_Lifecycle	Plant_Life_Forms	Plant_Clade	Salinity_duration	C3_C4	Nodulation	Ne	Nc	Me	Se	Mc	Sc
1	1	Abbaspour et al.	2006	Non saline	Claroideoglomus etunicatum	Claroideoglomus	Pistacia vera	Anacardiaceae	Woody	Perennial	Tree	Dicots	Moderate	C3	Non-legumes	4	4	1.97	0.42	1.46	0.42
1	2	Abbaspour et al.	2006	Low	Claroideoglomus etunicatum	Claroideoglomus	Pistacia vera	Anacardiaceae	Woody	Perennial	Tree	Dicots	Moderate	C3	Non-legumes	4	4	1.49	0.46	0.93	0.46
1	3	Abbaspour et al.	2006	Moderate	Claroideoglomus etunicatum	Claroideoglomus	Pistacia vera	Anacardiaceae	Woody	Perennial	Tree	Dicots	Moderate	C3	Non-legumes	4	4	1.01	0.24	0.713	0.24
1	4	Abbaspour et al.	2006	Moderate	Claroideoglomus etunicatum	Claroideoglomus	Pistacia vera	Anacardiaceae	Woody	Perennial	Tree	Dicots	Moderate	C3	Non-legumes	4	4	0.63	0.216	0.61	0.27
2	5	Abbaspour	2010	Non saline	Claroideoglomus etunicatum	Claroideoglomus	Carthamus tinctorius	Asteraceae	Herbaceous	Annual	Forb	Dicots	Moderate	C3	Non-legumes	4	4	2.03	0.44	1.49	0.44
2	6	Abbaspour	2010	Low	Claroideoglomus etunicatum	Claroideoglomus	Carthamus tinctorius	Asteraceae	Herbaceous	Annual	Forb	Dicots	Moderate	C3	Non-legumes	4	4	1.51	0.46	0.95	0.46
2	7	Abbaspour	2010	Moderate	Claroideoglomus etunicatum	Claroideoglomus	Carthamus tinctorius	Asteraceae	Herbaceous	Annual	Forb	Dicots	Moderate	C3	Non-legumes	4	4	1.05	0.26	0.72	0.26
2	8	Abbaspour	2010	High	Claroideoglomus etunicatum	Claroideoglomus	Carthamus tinctorius	Asteraceae	Herbaceous	Annual	Forb	Dicots	Moderate	C3	Non-legumes	4	4	0.64	0.24	0.61	0.3
3	9	Abdel-Fattah et al.	2013	Non saline	Funneliformis mosseae	Funneliformis	Triticum aestivum	Poaceae	Herbaceous	Annual	Grass	Monocots	Long	C3	Non-legumes	10	10	6.99	2.75118	5.25	2.75118
3	10	Abdel-Fattah et al.	2013	Low	Funneliformis mosseae	Funneliformis	Triticum aestivum	Poaceae	Herbaceous	Annual	Grass	Monocots	Long	C3	Non-legumes	10	10	2.62	0.56921	2.26	0.56921
3	11	Abdel-Fattah et al.	2013	Moderate	Funneliformis mosseae	Funneliformis	Triticum aestivum	Poaceae	Herbaceous	Annual	Grass	Monocots	Long	C3	Non-legumes	10	10	1.47	0.505964	1.14	0.505964
4	12	Al-Karaki	2000	Non saline	Funneliformis mosseae	Funneliformis	Solanum lycopersicum	Solanaceae	Herbaceous	Annual	Forb	Dicots	Moderate	C3	Non-legumes	4	4	2.33	0.96	1.62	1.08
4	13	Al-Karaki	2000	Low	Funneliformis mosseae	Funneliformis	Solanum lycopersicum	Solanaceae	Herbaceous	Annual	Forb	Dicots	Moderate	C3	Non-legumes	4	4	0.6	0.12	0.44	0.12
4	14	Al-Karaki	2000	Low	Funneliformis mosseae	Funneliformis	Solanum lycopersicum	Solanaceae	Herbaceous	Annual	Forb	Dicots	Moderate	C3	Non-legumes	4	4	1.57	0.6	1.05	0.12
5	15	Al-Karaki	2001	Non saline	Funneliformis mosseae	Funneliformis	Triticum aestivum	Poaceae	Herbaceous	Annual	Grass	Monocots	Moderate	C3	Non-legumes	4	4	5.39	1.2	4.43	1.5
5	16	Al-Karaki	2001	Non saline	Funneliformis mosseae	Funneliformis	Triticum aestivum	Poaceae	Herbaceous	Annual	Grass	Monocots	Moderate	C3	Non-legumes	4	4	4.99	1.2	4.13	1.5
5	17	Al-Karaki	2001	Low	Funneliformis mosseae	Funneliformis	Triticum aestivum	Poaceae	Herbaceous	Annual	Grass	Monocots	Moderate	C3	Non-legumes	4	4	4.02	1.2	3.06	1.5
5	18	Al-Karaki	2001	Low	Funneliformis mosseae	Funneliformis	Triticum aestivum	Poaceae	Herbaceous	Annual	Grass	Monocots	Moderate	C3	Non-legumes	4	4	3.68	1.2	2.33	1.5
5	19	Al-Karaki	2001	Low	Funneliformis mosseae	Funneliformis	Triticum aestivum	Poaceae	Herbaceous	Annual	Grass	Monocots	Moderate	C3	Non-legumes	4	4	1.84	0.8	1.66	0.9
5	20	Al-Karaki	2001	Low	Funneliformis mosseae	Funneliformis	Triticum aestivum	Poaceae	Herbaceous	Annual	Grass	Monocots	Moderate	C3	Non-legumes	4	4	1.74	0.8	1.09	0.5
9	21	Asghari	2008	Non saline	Rhizophagus intraradices	Rhizophagus	Trifolium subterraneum	Fabaceae	Herbaceous	Annual	Forb	Dicots	Short	C3	Legumes	3	3	687.64	180.673	498.2	120.673
9	22	Asghari	2008	Low	Rhizophagus intraradices	Rhizophagus	Trifolium subterraneum	Fabaceae	Herbaceous	Annual	Forb	Dicots	Short	C3	Legumes	3	3	683.59	80.6732	407.19	60.6732
9	23	Asghari	2008	Low	Rhizophagus intraradices	Rhizophagus	Trifolium subterraneum	Fabaceae	Herbaceous	Annual	Forb	Dicots	Short	C3	Legumes	3	3	548.09	80.6732	391.01	60.6732
9	24	Asghari	2008	Low	Rhizophagus intraradices	Rhizophagus	Trifolium subterraneum	Fabaceae	Herbaceous	Annual	Forb	Dicots	Short	C3	Legumes	3	3	855.51	403.366	480	60.6732
9	25	Asghari	2008	Moderate	Rhizophagus intraradices	Rhizophagus	Trifolium subterraneum	Fabaceae	Herbaceous	Annual	Forb	Dicots	Short	C3	Legumes	3	3	416.63	80.6732	274.83	20.6732
10	26	Asrar et al.	2014	Non saline	Septoglomus deserticola	Septoglomus	Kalanchoe blossfeldiana	Crassulaceae	Herbaceous	Perennial	Forb	Dicots	Moderate	C3	Non-legumes	10	10	4.65	2.36768	3.077	2.36768
10	27	Asrar et al.	2014	Low	Septoglomus deserticola	Septoglomus	Kalanchoe blossfeldiana	Crassulaceae	Herbaceous	Perennial	Forb	Dicots	Moderate	C3	Non-legumes	10	10	3.893	1.63013	2.81	1.63013
10	28	Asrar et al.	2014	Moderate	Septoglomus deserticola	Septoglomus	Kalanchoe blossfeldiana	Crassulaceae	Herbaceous	Perennial	Forb	Dicots	Moderate	C3	Non-legumes	10	10	1.8	0.903121	1.2	0.903121
10	29	Asrar et al.	2014	Moderate	Septoglomus deserticola	Septoglomus	Kalanchoe blossfeldiana	Crassulaceae	Herbaceous	Perennial	Forb	Dicots	Moderate	C3	Non-legumes	10	10	2.533	1.32909	1.65	1.32909
12	30	Bach Allen	1983	Non saline	Rhizophagus fasciculatus	Rhizophagus	Distichlis spicata	Poaceae	Herbaceous	Annual	Grass	Monocots	Moderate	C4	Non-legumes	10	10	0.431	0.523665	0.505	0.523665
12	31	Bach Allen	1983	Non saline	Rhizophagus fasciculatus	Rhizophagus	Distichlis spicata	Poaceae	Herbaceous	Annual	Grass	Monocots	Moderate	C4	Non-legumes	10	10	0.4282	0.523665	0.539	0.523665
12	32	Bach Allen	1983	Low	Rhizophagus fasciculatus	Rhizophagus	Distichlis spicata	Poaceae	Herbaceous	Annual	Grass	Monocots	Moderate	C4	Non-legumes	10	10	0.474	0.0523665	0.45	0.0523665
12	33	Bach Allen	1983	Low	Rhizophagus fasciculatus	Rhizophagus	Distichlis spicata	Poaceae	Herbaceous	Annual	Grass	Monocots	Moderate	C4	Non-legumes	10	10	0.464	0.0523665	0.439	0.0523665
12	34	Bach Allen	1983	Low	Rhizophagus fasciculatus	Rhizophagus	Distichlis spicata	Poaceae	Herbaceous	Annual	Grass	Monocots	Moderate	C4	Non-legumes	10	10	0.423	0.0523665	0.528	0.0523665
12	35	Bach Allen	1983	Low	Rhizophagus fasciculatus	Rhizophagus	Distichlis spicata	Poaceae	Herbaceous	Annual	Grass	Monocots	Moderate	C4	Non-legumes	10	10	0.523	0.261833	0.451	0.0523665
13	36	Beltrano et al.	2013	Non saline	Rhizophagus intraradices	Rhizophagus	Capsicum annuum	Solanaceae	Herbaceous	Annual/Perennial	Forb/Shrub	Dicots	Moderate	C3	Non-legumes	3	3	0.643	0.277128	0.283	0.074641
13	37	Beltrano et al.	2013	Low	Rhizophagus intraradices	Rhizophagus	Capsicum annuum	Solanaceae	Herbaceous	Annual/Perennial	Forb/Shrub	Dicots	Moderate	C3	Non-legumes	3	3	0.693	0.311769	0.108	0.0598076
13	38	Beltrano et al.	2013	Moderate	Rhizophagus intraradices	Rhizophagus	Capsicum annuum	Solanaceae	Herbaceous	Annual/Perennial	Forb/Shrub	Dicots	Moderate	C3	Non-legumes	3	3	0.511	0.0588897	0.32	0.0385641
13	39	Beltrano et al.	2013	Moderate	Rhizophagus intraradices	Rhizophagus	Capsicum annuum	Solanaceae	Herbaceous	Annual/Perennial	Forb/Shrub	Dicots	Moderate	C3	Non-legumes	3	3	0.573	0.259808	0.3133	0.054641
14	40	Bharti and Garg	2019	Non saline	Rhizophagus intraradices	Rhizophagus	Cicer arietinum	Fabaceae	Herbaceous	Annual	Forb	Dicots	Long	C3	Legumes	6	6	5.17	1.46969	4.14	2.93939
14	41	Bharti and Garg	2019	Non saline	Rhizophagus intraradices	Rhizophagus	Cicer arietinum	Fabaceae	Herbaceous	Annual	Forb	Dicots	Long	C3	Legumes	6	6	4.58	2.35151	4.04	1.10227
14	42	Bharti and Garg	2019	Low	Rhizophagus intraradices	Rhizophagus	Cicer arietinum	Fabaceae	Herbaceous	Annual	Forb	Dicots	Long	C3	Legumes	6	6	3.7	1.37171	2.55	1.83712
14	43	Bharti and Garg	2019	Low	Rhizophagus intraradices	Rhizophagus	Cicer arietinum	Fabaceae	Herbaceous	Annual	Forb	Dicots	Long	C3	Legumes	6	6	4.38	1.76363	3.27	1.10227
14	44	Bharti and Garg	2019	Low	Rhizophagus intraradices	Rhizophagus	Cicer arietinum	Fabaceae	Herbaceous	Annual	Forb	Dicots	Long	C3	Legumes	6	6	3.28	1.59217	2.7	1.10227
14	45	Bharti and Garg	2019	Low	Rhizophagus intraradices	Rhizophagus	Cicer arietinum	Fabaceae	Herbaceous	Annual	Forb	Dicots	Long	C3	Legumes	6	6	2.05	1.10227	1.62	0.489898
17	46	Borde et al.	2011	Non saline	Rhizophagus fasciculatus	Rhizophagus	Pennisetum glaucum	Poaceae	Herbaceous	Annual	Grass	Monocots	Moderate	C4	Non-legumes	3	3	0.38	0.1	0.16	0.02
17	47	Borde et al.	2011	Moderate	Rhizophagus fasciculatus	Rhizophagus	Pennisetum glaucum	Poaceae	Herbaceous	Annual	Grass	Monocots	Moderate	C4	Non-legumes	3	3	0.3	0.07	0.16	0.04
17	48	Borde et al.	2011	Moderate	Rhizophagus fasciculatus	Rhizophagus	Pennisetum glaucum	Poaceae	Herbaceous	Annual	Grass	Monocots	Moderate	C4	Non-legumes	3	3	0.29	0.1	0.16	0.07
17	49	Borde et al.	2011	High	Rhizophagus fasciculatus	Rhizophagus	Pennisetum glaucum	Poaceae	Herbaceous	Annual	Grass	Monocots	Moderate	C4	Non-legumes	3	3	0.25	0.05	0.1	0.04
18	50	Borde et al.	2010	Non saline	Rhizophagus fasciculatus	Rhizophagus	Allium sativum	Amaryllidaceae	Herbaceous	Annual	Forb	Monocots	Moderate	C3	Non-legumes	9	9	0.365	0.3	0.274	0.09
18	51	Borde et al.	2010	Moderate	Rhizophagus fasciculatus	Rhizophagus	Allium sativum	Amaryllidaceae	Herbaceous	Annual	Forb	Monocots	Moderate	C3	Non-legumes	9	9	0.334	0.12	0.247	0.03
18	52	Borde et al.	2010	Moderate	Rhizophagus fasciculatus	Rhizophagus	Allium sativum	Amaryllidaceae	Herbaceous	Annual	Forb	Monocots	Moderate	C3	Non-legumes	9	9	0.378	0.39	0.234	0.15
18	53	Borde et al.	2010	High	Rhizophagus fasciculatus	Rhizophagus	Allium sativum	Amaryllidaceae	Herbaceous	Annual	Forb	Monocots	Moderate	C3	Non-legumes	9	9	0.26	0.27	0.202	0.03
19	54	Campanelli et al.	2013	Non saline	Septoglomus viscosum	Septoglomus	Medicago sativa	Fabaceae	Herbaceous	Perennial	Forb	Dicots	Moderate	C3	Legumes	10	10	5.1	2.25778	3.6	2.25778
19	55	Campanelli et al.	2013	Moderate	Septoglomus viscosum	Septoglomus	Medicago sativa	Fabaceae	Herbaceous	Perennial	Forb	Dicots	Moderate	C3	Legumes	10	10	4.6	2.25778	2.9	2.25778
19	56	Campanelli et al.	2013	Moderate	Septoglomus viscosum	Septoglomus	Medicago sativa	Fabaceae	Herbaceous	Perennial	Forb	Dicots	Moderate	C3	Legumes	10	10	4	2.25778	2.5	2.25778
20	57	Carretero et al.	2008	Non saline	Rhizophagus intraradices	Rhizophagus	Manihot esculenta	Euphorbiaceae	Woody	Annual/Perennial	Shrub	Dicots	Moderate	C3	Non-legumes	3	3	157	35.9628	103	35.9628
20	58	Carretero et al.	2008	Non saline	Rhizophagus intraradices	Rhizophagus	Manihot esculenta	Euphorbiaceae	Woody	Annual/Perennial	Shrub	Dicots	Moderate	C3	Non-legumes	3	3	361	94.8233	209	94.8233
20	59	Carretero et al.	2008	Non saline	Rhizophagus intraradices	Rhizophagus	Manihot esculenta	Euphorbiaceae	Woody	Annual/Perennial	Shrub	Dicots	Moderate	C3	Non-legumes	3	3	174	75.9215	60	75.9215
20	60	Carretero et al.	2008	Low	Rhizophagus intraradices	Rhizophagus	Manihot esculenta	Euphorbiaceae	Woody	Annual/Perennial	Shrub	Dicots	Moderate	C3	Non-legumes	3	3	109	21.3113	77	21.3113
20	61	Carretero et al.	2008	Low	Rhizophagus intraradices	Rhizophagus	Manihot esculenta	Euphorbiaceae	Woody	Annual/Perennial	Shrub	Dicots	Moderate	C3	Non-legumes	3	3	185	39.2927	126	39.2927
20	62	Carretero et al.	2008	Low	Rhizophagus intraradices	Rhizophagus	Manihot esculenta	Euphorbiaceae	Woody	Annual/Perennial	Shrub	Dicots	Moderate	C3	Non-legumes	3	3	169	56.1454	79	56.1454
20	63	Carretero et al.	2008	Moderate	Rhizophagus intraradices	Rhizophagus	Manihot esculenta	Euphorbiaceae	Woody	Annual/Perennial	Shrub	Dicots	Moderate	C3	Non-legumes	3	3	63	15.9835	61	19.9793
20	64	Carretero et al.	2008	Moderate	Rhizophagus intraradices	Rhizophagus	Manihot esculenta	Euphorbiaceae	Woody	Annual/Perennial	Shrub	Dicots	Moderate	C3	Non-legumes	3	3	108	30.568	59	30.568
20	65	Carretero et al.	2008	Moderate	Rhizophagus intraradices	Rhizophagus	Manihot esculenta	Euphorbiaceae	Woody	Annual/Perennial	Shrub	Dicots	Moderate	C3	Non-legumes	3	3	158	55.9422	151	69.9277
21	66	Chang et al.	2018	Non saline	Rhizophagus intraradices	Rhizophagus	Elaeagnus angustifolia	Elaeagnaceae	Woody	Perennial	Shrub/Tree	Dicots	Short	C3	Non-legumes	3	3	1.09	0.242487	0.75	0.190526
21	67	Chang et al.	2018	High	Rhizophagus intraradices	Rhizophagus	Elaeagnus angustifolia	Elaeagnaceae	Woody	Perennial	Shrub/Tree	Dicots	Short	C3	Non-legumes	3	3	0.73	0.155885	0.59	0.259808
22	68	Chen et al.	2017	Non saline	Rhizophagus irregularis	Rhizophagus	Robinia pseudoacacia	Fabaceae	Woody	Perennial	Tree	Dicots	Short	C3	Legumes	30	30	2.19	1.36931	1.19	7.06562
22	69	Chen et al.	2017	Moderate	Rhizophagus irregularis	Rhizophagus	Robinia pseudoacacia	Fabaceae	Woody	Perennial	Tree	Dicots	Short	C3	Legumes	30	30	1.46	0.712039	0.99	0.668222
22	70	Chen et al.	2017	Moderate	Rhizophagus irregularis	Rhizophagus	Robinia pseudoacacia	Fabaceae	Woody	Perennial	Tree	Dicots	Short	C3	Legumes	30	30	2.09	1.18308	1.11	0.985901
24	71	Diouf et al.	2005	Non saline	Rhizophagus intraradices	Rhizophagus	Acacia auriculiformis	Fabaceae	Woody	Perennial	Tree	Dicots	Long	C3	Legumes	9	9	3.11	0.622669	2.67	0.622669
24	72	Diouf et al.	2005	Non saline	Rhizophagus intraradices	Rhizophagus	Acacia mangium	Fabaceae	Woody	Perennial	Tree	Dicots	Long	C3	Legumes	9	9	3.91	2.30671	2.28	2.30671
24	73	Diouf et al.	2005	Low	Rhizophagus intraradices	Rhizophagus	Acacia mangium	Fabaceae	Woody	Perennial	Tree	Dicots	Long	C3	Legumes	9	9	2.56	0.919852	1.91	0.919852
24	74	Diouf et al.	2005	Low	Rhizophagus intraradices	Rhizophagus	Acacia auriculiformis	Fabaceae	Woody	Perennial	Tree	Dicots	Long	C3	Legumes	9	9	3.55	1.96707	2.16	1.96707
24	75	Diouf et al.	2005	Moderate	Rhizophagus intraradices	Rhizophagus	Acacia mangium	Fabaceae	Woody	Perennial	Tree	Dicots	Long	C3	Legumes	9	9	1.42	0.438699	1.11	0.438699
24	76	Diouf et al.	2005	Moderate	Rhizophagus intraradices	Rhizophagus	Acacia auriculiformis	Fabaceae	Woody	Perennial	Tree	Dicots	Long	C3	Legumes	9	9	2.53	1.8114	1.25	1.8114
25	77	Dudhane et al.	2011	Non saline	Rhizophagus fasciculatus	Rhizophagus	Gmelina arborea.	Lamiaceae	Woody	Perennial	Tree	Dicots	Long	C3	Non-legumes	6	6	2.132	0.9	0.672	0.14
25	78	Dudhane et al.	2011	Moderate	Rhizophagus fasciculatus	Rhizophagus	Gmelina arborea.	Lamiaceae	Woody	Perennial	Tree	Dicots	Long	C3	Non-legumes	6	6	3.357	0.9	1.384	0.13
25	79	Dudhane et al.	2011	Moderate	Rhizophagus fasciculatus	Rhizophagus	Gmelina arborea.	Lamiaceae	Woody	Perennial	Tree	Dicots	Long	C3	Non-legumes	6	6	3.267	1.28	1.081	0.4
26	80	Duke et al.	1986	Non saline	Rhizophagus intraradices	Rhizophagus	Carrizo citrange	Rutaceae	Woody	Perennial	Shrub/Tree	Dicots	Moderate	C3	Non-legumes	5	5	1.18	0.67082	1.02	0.156525
26	81	Duke et al.	1986	Low	Rhizophagus intraradices	Rhizophagus	Carrizo citrange	Rutaceae	Woody	Perennial	Shrub/Tree	Dicots	Moderate	C3	Non-legumes	5	5	1.51	0.64846	1.02	0.156525
26	82	Duke et al.	1986	Low	Rhizophagus intraradices	Rhizophagus	Carrizo citrange	Rutaceae	Woody	Perennial	Shrub/Tree	Dicots	Moderate	C3	Non-legumes	5	5	1.05	0.581378	1.02	0.156525
26	83	Duke et al.	1986	Moderate	Rhizophagus intraradices	Rhizophagus	Carrizo citrange	Rutaceae	Woody	Perennial	Shrub/Tree	Dicots	Moderate	C3	Non-legumes	5	5	0.68	0.33541	0.40021	0.0894427
27	84	Echeverria et al.	2008	Non saline	Rhizophagus intraradices	Rhizophagus	Lotus glaber	Fabaceae	Herbaceous	Annual	Forb	Dicots	Short	C3	Legumes	4	4	0.04	0.008	0.042	0.008
27	85	Echeverria et al.	2008	Non saline	Rhizophagus intraradices	Rhizophagus	Lotus glaber	Fabaceae	Herbaceous	Annual	Forb	Dicots	Short	C3	Legumes	4	4	0.058	0.016	0.105	0.022
27	86	Echeverria et al.	2008	Moderate	Rhizophagus intraradices	Rhizophagus	Lotus glaber	Fabaceae	Herbaceous	Annual	Forb	Dicots	Short	C3	Legumes	4	4	0.077	0.016	0.04	0.008
27	87	Echeverria et al.	2008	Moderate	Rhizophagus intraradices	Rhizophagus	Lotus glaber	Fabaceae	Herbaceous	Annual	Forb	Dicots	Short	C3	Legumes	4	4	0.081	0.026	0.027	0.008
28	88	Echeverria et al.	2013	Non saline	Rhizophagus intraradices	Rhizophagus	Lotus tenuis	Fabaceae	Herbaceous	Annual	Forb	Dicots	Short	C3	Legumes	4	4	173.12	70.94	120.65	55.28
28	89	Echeverria et al.	2013	Moderate	Rhizophagus intraradices	Rhizophagus	Lotus tenuis	Fabaceae	Herbaceous	Annual	Forb	Dicots	Short	C3	Legumes	4	4	88.43	27.4	102.24	24.62
29	90	Elhindi et al.	2017	Non saline	Septoglomus deserticola	Septoglomus	Ocimum basilicum	Lamiaceae	Herbaceous	Annual/Perennial	Forb	Dicots	Moderate	C3	Non-legumes	4	4	21.28	10.56	17.21	7.5
29	91	Elhindi et al.	2017	Low	Septoglomus deserticola	Septoglomus	Ocimum basilicum	Lamiaceae	Herbaceous	Annual/Perennial	Forb	Dicots	Moderate	C3	Non-legumes	4	4	14.47	2.74	12.31	6.3
29	92	Elhindi et al.	2017	Moderate	Septoglomus deserticola	Septoglomus	Ocimum basilicum	Lamiaceae	Herbaceous	Annual/Perennial	Forb	Dicots	Moderate	C3	Non-legumes	4	4	10.41	4.32	8.95	5.22
30	93	Estrada et al.	2013a	Non saline	Rhizophagus intraradices	Rhizophagus	Zea mays	Poaceae	Herbaceous	Annual	Grass	Monocots	Short	C4	Non-legumes	10	10	5.084	0.600833	4.042	2.67529
30	94	Estrada et al.	2013a	Non saline	Rhizophagus intraradices	Rhizophagus	Zea mays	Poaceae	Herbaceous	Annual	Grass	Monocots	Short	C4	Non-legumes	10	10	3.884	1.99223	4.042	2.67529
30	95	Estrada et al.	2013a	Low	Rhizophagus intraradices	Rhizophagus	Zea mays	Poaceae	Herbaceous	Annual	Grass	Monocots	Short	C4	Non-legumes	10	10	3.536	0.38896	3.978	1.59695
30	96	Estrada et al.	2013a	Low	Rhizophagus intraradices	Rhizophagus	Zea mays	Poaceae	Herbaceous	Annual	Grass	Monocots	Short	C4	Non-legumes	10	10	4.61	0.63878	3.978	1.59695
30	97	Estrada et al.	2013a	Moderate	Rhizophagus intraradices	Rhizophagus	Zea mays	Poaceae	Herbaceous	Annual	Grass	Monocots	Short	C4	Non-legumes	10	10	4.168	0.474342	3.694	0.351013
30	98	Estrada et al.	2013a	Moderate	Rhizophagus intraradices	Rhizophagus	Zea mays	Poaceae	Herbaceous	Annual	Grass	Monocots	Short	C4	Non-legumes	10	10	3.157	0.547074	3.694	0.351013
31	99	Estrada et al.	2013b	Non saline	Claroideoglomus etunicatum	Claroideoglomus	Zea mays	Poaceae	Herbaceous	Annual	Grass	Monocots	Short	C4	Non-legumes	10	10	3.82	0.853815	4.06	0.379473
31	100	Estrada et al.	2013b	Non saline	Rhizophagus intraradices	Rhizophagus	Zea mays	Poaceae	Herbaceous	Annual	Grass	Monocots	Short	C4	Non-legumes	10	10	3.82	0.505964	4.06	0.379473
31	101	Estrada et al.	2013b	Non saline	Rhizophagus intraradices	Rhizophagus	Zea mays	Poaceae	Herbaceous	Annual	Grass	Monocots	Short	C4	Non-legumes	10	10	5.02	0.758947	4.06	0.379473
31	102	Estrada et al.	2013b	Non saline	Septoglomus constrictum	Septoglomus	Zea mays	Poaceae	Herbaceous	Annual	Grass	Monocots	Short	C4	Non-legumes	10	10	4.98	0.56921	4.06	0.379473
31	103	Estrada et al.	2013b	Low	Claroideoglomus etunicatum	Claroideoglomus	Zea mays	Poaceae	Herbaceous	Annual	Grass	Monocots	Short	C4	Non-legumes	10	10	3.63	0.790569	3.96	2.56144
31	104	Estrada et al.	2013b	Low	Rhizophagus intraradices	Rhizophagus	Zea mays	Poaceae	Herbaceous	Annual	Grass	Monocots	Short	C4	Non-legumes	10	10	4.59	0.727324	3.96	2.56144
31	105	Estrada et al.	2013b	Low	Rhizophagus intraradices	Rhizophagus	Zea mays	Poaceae	Herbaceous	Annual	Grass	Monocots	Short	C4	Non-legumes	10	10	3.57	1.58114	3.96	2.56144
31	106	Estrada et al.	2013b	Low	Septoglomus constrictum	Septoglomus	Zea mays	Poaceae	Herbaceous	Annual	Grass	Monocots	Short	C4	Non-legumes	10	10	5.18	2.37171	3.96	2.56144
31	107	Estrada et al.	2013b	Moderate	Claroideoglomus etunicatum	Claroideoglomus	Zea mays	Poaceae	Herbaceous	Annual	Grass	Monocots	Short	C4	Non-legumes	10	10	2.26	0.56921	3.7	1.58114
31	108	Estrada et al.	2013b	Moderate	Rhizophagus intraradices	Rhizophagus	Zea mays	Poaceae	Herbaceous	Annual	Grass	Monocots	Short	C4	Non-legumes	10	10	3.23	0.505964	3.7	1.58114
31	109	Estrada et al.	2013b	Moderate	Rhizophagus intraradices	Rhizophagus	Zea mays	Poaceae	Herbaceous	Annual	Grass	Monocots	Short	C4	Non-legumes	10	10	4.21	1.73925	3.7	1.58114
31	110	Estrada et al.	2013b	Moderate	Septoglomus constrictum	Septoglomus	Zea mays	Poaceae	Herbaceous	Annual	Grass	Monocots	Short	C4	Non-legumes	10	10	4.63	1.73925	3.7	1.58114
32	111	Estrada et al.	2013c	Non saline	Claroideoglomus etunicatum	Claroideoglomus	Zea mays	Poaceae	Herbaceous	Annual	Grass	Monocots	Short	C4	Non-legumes	10	10	3.87	1.01193	4.03	0.442719
32	112	Estrada et al.	2013c	Non saline	Rhizophagus intraradices	Rhizophagus	Zea mays	Poaceae	Herbaceous	Annual	Grass	Monocots	Short	C4	Non-legumes	10	10	5.07	0.695701	4.03	0.442719
32	113	Estrada et al.	2013c	Non saline	Rhizophagus intraradices	Rhizophagus	Zea mays	Poaceae	Herbaceous	Annual	Grass	Monocots	Short	C4	Non-legumes	10	10	3.87	1.73925	4.03	0.442719
32	114	Estrada et al.	2013c	Non saline	Septoglomus constrictum	Septoglomus	Zea mays	Poaceae	Herbaceous	Annual	Grass	Monocots	Short	C4	Non-legumes	10	10	4.97	1.01193	4.03	0.442719
32	115	Estrada et al.	2013c	Low	Claroideoglomus etunicatum	Claroideoglomus	Zea mays	Poaceae	Herbaceous	Annual	Grass	Monocots	Short	C4	Non-legumes	10	10	3.64	0.790569	3.95	0.379473
32	116	Estrada et al.	2013c	Low	Rhizophagus intraradices	Rhizophagus	Zea mays	Poaceae	Herbaceous	Annual	Grass	Monocots	Short	C4	Non-legumes	10	10	4.62	0.56921	3.95	0.379473
32	117	Estrada et al.	2013c	Low	Rhizophagus intraradices	Rhizophagus	Zea mays	Poaceae	Herbaceous	Annual	Grass	Monocots	Short	C4	Non-legumes	10	10	3.51	0.442719	3.95	0.379473
32	118	Estrada et al.	2013c	Low	Septoglomus constrictum	Septoglomus	Zea mays	Poaceae	Herbaceous	Annual	Grass	Monocots	Short	C4	Non-legumes	10	10	5.17	3.03579	3.95	0.379473
32	119	Estrada et al.	2013c	Moderate	Claroideoglomus etunicatum	Claroideoglomus	Zea mays	Poaceae	Herbaceous	Annual	Grass	Monocots	Short	C4	Non-legumes	10	10	4.19	1.73925	3.69	1.58114
32	120	Estrada et al.	2013c	Moderate	Rhizophagus intraradices	Rhizophagus	Zea mays	Poaceae	Herbaceous	Annual	Grass	Monocots	Short	C4	Non-legumes	10	10	3.17	0.505964	3.69	1.58114
32	121	Estrada et al.	2013c	Moderate	Rhizophagus intraradices	Rhizophagus	Zea mays	Poaceae	Herbaceous	Annual	Grass	Monocots	Short	C4	Non-legumes	10	10	3.17	0.505964	3.69	1.58114
32	122	Estrada et al.	2013c	Moderate	Septoglomus constrictum	Septoglomus	Zea mays	Poaceae	Herbaceous	Annual	Grass	Monocots	Short	C4	Non-legumes	10	10	4.62	1.73925	3.69	1.58114
33	123	Evelin and Kapoor	2014	Non saline	Rhizophagus intraradices	Rhizophagus	Trigonella foenum-graecum	Fabaceae	Herbaceous	Annual	Forb	Dicots	Short	C3	Legumes	3	3	0.91	0.318157	0.4	0.318157
33	124	Evelin and Kapoor	2014	Low	Rhizophagus intraradices	Rhizophagus	Trigonella foenum-graecum	Fabaceae	Herbaceous	Annual	Forb	Dicots	Short	C3	Legumes	3	3	0.43	0.0810989	0.3	0.0810989
33	125	Evelin and Kapoor	2014	Moderate	Rhizophagus intraradices	Rhizophagus	Trigonella foenum-graecum	Fabaceae	Herbaceous	Annual	Forb	Dicots	Short	C3	Legumes	3	3	0.3	0.0623838	0.2	0.0623838
33	126	Evelin and Kapoor	2014	Moderate	Rhizophagus intraradices	Rhizophagus	Trigonella foenum-graecum	Fabaceae	Herbaceous	Annual	Forb	Dicots	Short	C3	Legumes	3	3	0.32	0.149721	0.3	0.187151
34	127	Evelin et al.	2012	Non saline	Rhizophagus intraradices	Rhizophagus	Trigonella foenum-graecum	Fabaceae	Herbaceous	Annual	Forb	Dicots	Short	C3	Legumes	3	3	0.91	0.32	0.36	0.18
34	128	Evelin et al.	2012	Low	Rhizophagus intraradices	Rhizophagus	Trigonella foenum-graecum	Fabaceae	Herbaceous	Annual	Forb	Dicots	Short	C3	Legumes	3	3	0.43	0.2	0.29	0.18
34	129	Evelin et al.	2012	Moderate	Rhizophagus intraradices	Rhizophagus	Trigonella foenum-graecum	Fabaceae	Herbaceous	Annual	Forb	Dicots	Short	C3	Legumes	3	3	0.32	0.12	0.26	0.1
34	130	Evelin et al.	2012	Moderate	Rhizophagus intraradices	Rhizophagus	Trigonella foenum-graecum	Fabaceae	Herbaceous	Annual	Forb	Dicots	Short	C3	Legumes	3	3	0.28	0.15	0.19	0.09
36	131	Garg and Baher	2013	Non saline	Funneliformis mosseae	Funneliformis	Cicer arietinum	Fabaceae	Herbaceous	Annual	Forb	Dicots	Long	C3	Legumes	6	6	2.364	0.897493	1.762	0.195959
36	132	Garg and Baher	2013	Non saline	Funneliformis mosseae	Funneliformis	Cicer arietinum	Fabaceae	Herbaceous	Annual	Forb	Dicots	Long	C3	Legumes	6	6	2.38	1.01899	1.79	0.698105
36	133	Garg and Baher	2013	Moderate	Funneliformis mosseae	Funneliformis	Cicer arietinum	Fabaceae	Herbaceous	Annual	Forb	Dicots	Long	C3	Legumes	6	6	1.305	0.195959	0.836	0.269444
36	134	Garg and Baher	2013	Moderate	Funneliformis mosseae	Funneliformis	Cicer arietinum	Fabaceae	Herbaceous	Annual	Forb	Dicots	Long	C3	Legumes	6	6	1.41	0.254747	0.89	0.423762
36	135	Garg and Baher	2013	Moderate	Funneliformis mosseae	Funneliformis	Cicer arietinum	Fabaceae	Herbaceous	Annual	Forb	Dicots	Long	C3	Legumes	6	6	1.78	0.352727	1.2	0.183712
36	136	Garg and Baher	2013	Moderate	Funneliformis mosseae	Funneliformis	Cicer arietinum	Fabaceae	Herbaceous	Annual	Forb	Dicots	Long	C3	Legumes	6	6	1.734	0.374772	1.234	0.127373
36	137	Garg and Baher	2013	Moderate	Funneliformis mosseae	Funneliformis	Cicer arietinum	Fabaceae	Herbaceous	Annual	Forb	Dicots	Long	C3	Legumes	6	6	2.03	0.462954	1.46	0.252297
36	138	Garg and Baher	2013	Moderate	Funneliformis mosseae	Funneliformis	Cicer arietinum	Fabaceae	Herbaceous	Annual	Forb	Dicots	Long	C3	Legumes	6	6	0.771	0.509494	0.469	0.266994
38	139	Garg and Bhandari	2016b	Non saline	Funneliformis mosseae	Funneliformis	Cicer arietinum	Fabaceae	Herbaceous	Annual	Forb	Dicots	Long	C3	Legumes	6	6	3.86	1.46969	3.09	1.76363
38	140	Garg and Bhandari	2016b	Non saline	Funneliformis mosseae	Funneliformis	Cicer arietinum	Fabaceae	Herbaceous	Annual	Forb	Dicots	Long	C3	Legumes	6	6	3.35	1.34722	2.78	1.22474
38	141	Garg and Bhandari	2016b	Low	Funneliformis mosseae	Funneliformis	Cicer arietinum	Fabaceae	Herbaceous	Annual	Forb	Dicots	Long	C3	Legumes	6	6	3.29	1.22474	2.41	1.54318
38	142	Garg and Bhandari	2016b	Low	Funneliformis mosseae	Funneliformis	Cicer arietinum	Fabaceae	Herbaceous	Annual	Forb	Dicots	Long	C3	Legumes	6	6	2.53	0.979796	1.94	0.857321
38	143	Garg and Bhandari	2016b	Low	Funneliformis mosseae	Funneliformis	Cicer arietinum	Fabaceae	Herbaceous	Annual	Forb	Dicots	Long	C3	Legumes	6	6	3	1.46969	2.07	0.293939
38	144	Garg and Bhandari	2016b	Low	Funneliformis mosseae	Funneliformis	Cicer arietinum	Fabaceae	Herbaceous	Annual	Forb	Dicots	Long	C3	Legumes	6	6	2.04	1.17576	1.5	0.244949
38	145	Garg and Bhandari	2016b	Moderate	Funneliformis mosseae	Funneliformis	Cicer arietinum	Fabaceae	Herbaceous	Annual	Forb	Dicots	Long	C3	Legumes	6	6	1.09	0.269444	0.76	0.244949
38	146	Garg and Bhandari	2016b	Moderate	Funneliformis mosseae	Funneliformis	Cicer arietinum	Fabaceae	Herbaceous	Annual	Forb	Dicots	Long	C3	Legumes	6	6	2.08	0.979796	1.35	0.269444
39	147	Garg and Bharti	2018	Non saline	Rhizophagus intraradices	Rhizophagus	Cicer arietinum	Fabaceae	Herbaceous	Annual	Forb	Dicots	Moderate	C3	Legumes	6	6	3.41	1.46969	3.71	0.734847
39	148	Garg and Bharti	2018	Non saline	Rhizophagus intraradices	Rhizophagus	Cicer arietinum	Fabaceae	Herbaceous	Annual	Forb	Dicots	Moderate	C3	Legumes	6	6	3.04	1.56767	3.26	1.10227
39	149	Garg and Bharti	2018	Low	Rhizophagus intraradices	Rhizophagus	Cicer arietinum	Fabaceae	Herbaceous	Annual	Forb	Dicots	Moderate	C3	Legumes	6	6	3.01	1.17576	3.35	1.46969
39	150	Garg and Bharti	2018	Low	Rhizophagus intraradices	Rhizophagus	Cicer arietinum	Fabaceae	Herbaceous	Annual	Forb	Dicots	Moderate	C3	Legumes	6	6	2.31	0.979796	2.54	1.10227
39	151	Garg and Bharti	2018	Low	Rhizophagus intraradices	Rhizophagus	Cicer arietinum	Fabaceae	Herbaceous	Annual	Forb	Dicots	Moderate	C3	Legumes	6	6	2.73	1.17576	2.95	1.83712
39	152	Garg and Bharti	2018	Low	Rhizophagus intraradices	Rhizophagus	Cicer arietinum	Fabaceae	Herbaceous	Annual	Forb	Dicots	Moderate	C3	Legumes	6	6	3.31	2.02449	3.66	1.10227
39	153	Garg and Bharti	2018	Moderate	Rhizophagus intraradices	Rhizophagus	Cicer arietinum	Fabaceae	Herbaceous	Annual	Forb	Dicots	Moderate	C3	Legumes	6	6	2.62	0.881816	2.97	1.83712
39	154	Garg and Bharti	2018	Moderate	Rhizophagus intraradices	Rhizophagus	Cicer arietinum	Fabaceae	Herbaceous	Annual	Forb	Dicots	Moderate	C3	Legumes	6	6	1.55	0.783837	1.71	1.10227
40	155	Garg and Chandel	2011	Non saline	Funneliformis mosseae	Funneliformis	Cajanus cajan	Fabaceae	Woody	Annual/Perennial	Shrub	Dicots	Moderate	C3	Legumes	6	6	1.08	0.330681	0.865	0.298838
40	156	Garg and Chandel	2011	Non saline	Funneliformis mosseae	Funneliformis	Cajanus cajan	Fabaceae	Woody	Annual/Perennial	Shrub	Dicots	Moderate	C3	Legumes	6	6	0.424	0.276792	0.309	0.274343
40	157	Garg and Chandel	2011	Low	Funneliformis mosseae	Funneliformis	Cajanus cajan	Fabaceae	Woody	Annual/Perennial	Shrub	Dicots	Moderate	C3	Legumes	6	6	0.229	0.0587878	0.196	0.202083
40	158	Garg and Chandel	2011	Low	Funneliformis mosseae	Funneliformis	Cajanus cajan	Fabaceae	Woody	Annual/Perennial	Shrub	Dicots	Moderate	C3	Legumes	6	6	0.937	0.323333	0.795	0.347828
40	159	Garg and Chandel	2011	Low	Funneliformis mosseae	Funneliformis	Cajanus cajan	Fabaceae	Woody	Annual/Perennial	Shrub	Dicots	Moderate	C3	Legumes	6	6	0.845	0.308636	0.758	0.281691
40	160	Garg and Chandel	2011	Low	Funneliformis mosseae	Funneliformis	Cajanus cajan	Fabaceae	Woody	Annual/Perennial	Shrub	Dicots	Moderate	C3	Legumes	6	6	0.274	0.352727	0.232	0.203308
41	161	Garg and Chandel	2012	Non saline	Funneliformis mosseae	Funneliformis	Cajanus cajan	Fabaceae	Woody	Annual/Perennial	Shrub	Dicots	Moderate	C3	Legumes	6	6	3.183	0.419843	2.447	1.09982
41	162	Garg and Chandel	2012	Non saline	Funneliformis mosseae	Funneliformis	Cajanus cajan	Fabaceae	Woody	Annual/Perennial	Shrub	Dicots	Moderate	C3	Legumes	6	6	6.726	2.04287	4.775	3.23333
41	163	Garg and Chandel	2012	Low	Funneliformis mosseae	Funneliformis	Cajanus cajan	Fabaceae	Woody	Annual/Perennial	Shrub	Dicots	Moderate	C3	Legumes	6	6	1.68	0.590327	1.223	0.688307
41	164	Garg and Chandel	2012	Low	Funneliformis mosseae	Funneliformis	Cajanus cajan	Fabaceae	Woody	Annual/Perennial	Shrub	Dicots	Moderate	C3	Legumes	6	6	5.608	2.15555	3.609	1.50154
42	165	Garg and Manchanda	2009	Non saline	Funneliformis mosseae	Funneliformis	Cajanus cajan	Fabaceae	Woody	Annual/Perennial	Shrub	Dicots	Moderate	C3	Legumes	6	6	8.314	4.29294	4.409	4.29294
42	166	Garg and Manchanda	2009	Low	Funneliformis mosseae	Funneliformis	Cajanus cajan	Fabaceae	Woody	Annual/Perennial	Shrub	Dicots	Moderate	C3	Legumes	6	6	3.955	1.57976	2.518	1.57976
42	167	Garg and Manchanda	2009	Low	Funneliformis mosseae	Funneliformis	Cajanus cajan	Fabaceae	Woody	Annual/Perennial	Shrub	Dicots	Moderate	C3	Legumes	6	6	2.889	1.43684	1.582	1.43684
42	168	Garg and Manchanda	2009	Low	Funneliformis mosseae	Funneliformis	Cajanus cajan	Fabaceae	Woody	Annual/Perennial	Shrub	Dicots	Moderate	C3	Legumes	6	6	6.617	3.65202	3.295	3.65202
43	169	Garg and Pandey	2016	Non saline	Funneliformis mosseae	Funneliformis	Cajanus cajan	Fabaceae	Woody	Annual/Perennial	Shrub	Dicots	Moderate	C3	Legumes	6	6	6.85	0.881816	5.31	0.685857
43	170	Garg and Pandey	2016	Non saline	Funneliformis mosseae	Funneliformis	Cajanus cajan	Fabaceae	Woody	Annual/Perennial	Shrub	Dicots	Moderate	C3	Legumes	6	6	6.52	3.42929	5.19	3.30681
43	171	Garg and Pandey	2016	Non saline	Rhizophagus irregularis	Rhizophagus	Cajanus cajan	Fabaceae	Woody	Annual/Perennial	Shrub	Dicots	Moderate	C3	Legumes	6	6	7.21	1.15126	5.31	0.685857
43	172	Garg and Pandey	2016	Non saline	Rhizophagus irregularis	Rhizophagus	Cajanus cajan	Fabaceae	Woody	Annual/Perennial	Shrub	Dicots	Moderate	C3	Legumes	6	6	6.69	3.42929	5.19	3.30681
43	173	Garg and Pandey	2016	Low	Funneliformis mosseae	Funneliformis	Cajanus cajan	Fabaceae	Woody	Annual/Perennial	Shrub	Dicots	Moderate	C3	Legumes	6	6	6.1	2.32702	4.26	0.703004
43	174	Garg and Pandey	2016	Low	Funneliformis mosseae	Funneliformis	Cajanus cajan	Fabaceae	Woody	Annual/Perennial	Shrub	Dicots	Moderate	C3	Legumes	6	6	4.86	2.20454	3.49	1.34722
43	175	Garg and Pandey	2016	Low	Rhizophagus irregularis	Rhizophagus	Cajanus cajan	Fabaceae	Woody	Annual/Perennial	Shrub	Dicots	Moderate	C3	Legumes	6	6	5.6	2.08207	3.49	1.34722
43	176	Garg and Pandey	2016	Low	Rhizophagus irregularis	Rhizophagus	Cajanus cajan	Fabaceae	Woody	Annual/Perennial	Shrub	Dicots	Moderate	C3	Legumes	6	6	7.38	3.06186	4.26	0.703004
43	177	Garg and Pandey	2016	Moderate	Funneliformis mosseae	Funneliformis	Cajanus cajan	Fabaceae	Woody	Annual/Perennial	Shrub	Dicots	Moderate	C3	Legumes	6	6	2.52	0.685857	1.69	0.685857
43	178	Garg and Pandey	2016	Moderate	Funneliformis mosseae	Funneliformis	Cajanus cajan	Fabaceae	Woody	Annual/Perennial	Shrub	Dicots	Moderate	C3	Legumes	6	6	4.33	2.32702	2.65	0.636867
43	179	Garg and Pandey	2016	Moderate	Rhizophagus irregularis	Rhizophagus	Cajanus cajan	Fabaceae	Woody	Annual/Perennial	Shrub	Dicots	Moderate	C3	Legumes	6	6	3.06	0.367423	1.69	0.685857
43	180	Garg and Pandey	2016	Moderate	Rhizophagus irregularis	Rhizophagus	Cajanus cajan	Fabaceae	Woody	Annual/Perennial	Shrub	Dicots	Moderate	C3	Legumes	6	6	5.26	2.93939	2.65	0.636867
44	181	Huang et al.	2013	Non saline	Claroideoglomus etunicatum	Claroideoglomus	Cucurbita pepo	Cucurbitaceae	Herbaceous	Annual	Forb	Dicots	Short	C3	Non-legumes	3	3	18.65	8.64	18.32	11.85
44	182	Huang et al.	2013	Non saline	Claroideoglomus etunicatum	Claroideoglomus	Cucurbita pepo	Cucurbitaceae	Herbaceous	Annual	Forb	Dicots	Short	C3	Non-legumes	3	3	23.65	12.64	18.92	11.85
44	183	Huang et al.	2013	Non saline	Funneliformis mosseae	Funneliformis	Cucurbita pepo	Cucurbitaceae	Herbaceous	Annual	Forb	Dicots	Short	C3	Non-legumes	3	3	22.07	11.8	18.92	11.85
44	184	Huang et al.	2013	Non saline	Funneliformis mosseae	Funneliformis	Cucurbita pepo	Cucurbitaceae	Herbaceous	Annual	Forb	Dicots	Short	C3	Non-legumes	3	3	20.07	10.88	18.32	11.85
44	185	Huang et al.	2013	Low	Claroideoglomus etunicatum	Claroideoglomus	Cucurbita pepo	Cucurbitaceae	Herbaceous	Annual	Forb	Dicots	Short	C3	Non-legumes	3	3	19.71	2.36	18.13	3.15
44	186	Huang et al.	2013	Low	Claroideoglomus etunicatum	Claroideoglomus	Cucurbita pepo	Cucurbitaceae	Herbaceous	Annual	Forb	Dicots	Short	C3	Non-legumes	3	3	20.71	10.88	19.13	10.35
44	187	Huang et al.	2013	Low	Funneliformis mosseae	Funneliformis	Cucurbita pepo	Cucurbitaceae	Herbaceous	Annual	Forb	Dicots	Short	C3	Non-legumes	3	3	21.28	2.36	18.13	3.15
44	188	Huang et al.	2013	Low	Funneliformis mosseae	Funneliformis	Cucurbita pepo	Cucurbitaceae	Herbaceous	Annual	Forb	Dicots	Short	C3	Non-legumes	3	3	20.28	8.48	19.13	10.15
45	189	Latef and Chaoxing	2014	Non saline	Funneliformis mosseae	Funneliformis	Capsicum annuum	Solanaceae	Herbaceous	Annual/Perennial	Forb/Shrub	Dicots	Long	C3	Non-legumes	6	6	1.99	0.285829	1.73	0.285829
45	190	Latef and Chaoxing	2014	Low	Funneliformis mosseae	Funneliformis	Capsicum annuum	Solanaceae	Herbaceous	Annual/Perennial	Forb/Shrub	Dicots	Long	C3	Non-legumes	6	6	1.92	0.263842	1.68	0.263842
45	191	Latef and Chaoxing	2014	Low	Funneliformis mosseae	Funneliformis	Capsicum annuum	Solanaceae	Herbaceous	Annual/Perennial	Forb/Shrub	Dicots	Long	C3	Non-legumes	6	6	1.51	0.329803	1.21	0.329803
45	192	Latef and Chaoxing	2014	Moderate	Funneliformis mosseae	Funneliformis	Capsicum annuum	Solanaceae	Herbaceous	Annual/Perennial	Forb/Shrub	Dicots	Long	C3	Non-legumes	6	6	1.31	0.362783	0.98	0.362783
47	193	Hajiboland et al.	2010	Non saline	Rhizophagus intraradices	Rhizophagus	Solanum lycopersicum	Solanaceae	Herbaceous	Annual	Forb/Herb	Dicots	Long	C3	Non-legumes	4	4	6.119	2.652	4.94	2.646
47	194	Hajiboland et al.	2010	Non saline	Rhizophagus intraradices	Rhizophagus	Solanum lycopersicum	Solanaceae	Herbaceous	Annual	Forb/Herb	Dicots	Long	C3	Non-legumes	4	4	3.428	1.84	2.138	1.095
47	195	Hajiboland et al.	2010	Low	Rhizophagus intraradices	Rhizophagus	Solanum lycopersicum	Solanaceae	Herbaceous	Annual	Forb/Herb	Dicots	Long	C3	Non-legumes	4	4	4.497	2.208	2.654	1.105
47	196	Hajiboland et al.	2010	Low	Rhizophagus intraradices	Rhizophagus	Solanum lycopersicum	Solanaceae	Herbaceous	Annual	Forb/Herb	Dicots	Long	C3	Non-legumes	4	4	3.428	1.764	2.506	1.65
47	197	Hajiboland et al.	2010	Moderate	Rhizophagus intraradices	Rhizophagus	Solanum lycopersicum	Solanaceae	Herbaceous	Annual	Forb/Herb	Dicots	Long	C3	Non-legumes	4	4	1.364	0.55	0.921	0.11
47	198	Hajiboland et al.	2010	Moderate	Rhizophagus intraradices	Rhizophagus	Solanum lycopersicum	Solanaceae	Herbaceous	Annual	Forb/Herb	Dicots	Long	C3	Non-legumes	4	4	1.843	0.92	0.589	0.147
48	199	He and Huang	2013	Non saline	Funneliformis mosseae	Funneliformis	Solanum lycopersicum	Solanaceae	Herbaceous	Annual	Herb	Dicots	Long	C3	Non-legumes	6	6	5.3	2.54747	4.5	2.42499
48	200	He and Huang	2013	Low	Funneliformis mosseae	Funneliformis	Solanum lycopersicum	Solanaceae	Herbaceous	Annual	Herb	Dicots	Long	C3	Non-legumes	6	6	2.35	1.10227	1.91	0.734847
48	201	He and Huang	2013	Low	Funneliformis mosseae	Funneliformis	Solanum lycopersicum	Solanaceae	Herbaceous	Annual	Herb	Dicots	Long	C3	Non-legumes	6	6	3.35	1.95959	2.8	0.269444
49	202	He et al.	2007	Non saline	Funneliformis mosseae	Funneliformis	Solanum lycopersicum	Solanaceae	Herbaceous	Annual	Herb	Dicots	Long	C3	Non-legumes	6	6	6.26	2.44949	5.98	2.75568
49	203	He et al.	2007	Low	Funneliformis mosseae	Funneliformis	Solanum lycopersicum	Solanaceae	Herbaceous	Annual	Herb	Dicots	Long	C3	Non-legumes	6	6	5.38	1.97796	5.08	1.97796
49	204	He et al.	2007	Low	Funneliformis mosseae	Funneliformis	Solanum lycopersicum	Solanaceae	Herbaceous	Annual	Herb	Dicots	Long	C3	Non-legumes	6	6	5.64	2.81397	5.32	3.16572
50	205	He et al.	2010	Non saline	Funneliformis mosseae	Funneliformis	Solanum lycopersicum	Solanaceae	Herbaceous	Annual	Herb	Dicots	Long	C3	Non-legumes	6	6	6.26	2.44949	5.98	2.75568
50	206	He et al.	2010	Low	Funneliformis mosseae	Funneliformis	Solanum lycopersicum	Solanaceae	Herbaceous	Annual	Herb	Dicots	Long	C3	Non-legumes	6	6	5.38	2.62585	5.08	2.95408
50	207	He et al.	2010	Low	Funneliformis mosseae	Funneliformis	Solanum lycopersicum	Solanaceae	Herbaceous	Annual	Herb	Dicots	Long	C3	Non-legumes	6	6	5.64	2.80222	5.32	3.15249
52	208	Huang et al.	2010	Non saline	Funneliformis mosseae	Funneliformis	Solanum lycopersicum	Solanaceae	Herbaceous	Annual	Herb	Dicots	Long	C3	Non-legumes	10	10	14.35	4.247	9.917	6.18
52	209	Huang et al.	2010	Low	Funneliformis mosseae	Funneliformis	Solanum lycopersicum	Solanaceae	Herbaceous	Annual	Herb	Dicots	Long	C3	Non-legumes	10	10	13.855	3.329	8.103	2.46
52	210	Huang et al.	2010	Moderate	Funneliformis mosseae	Funneliformis	Solanum lycopersicum	Solanaceae	Herbaceous	Annual	Herb	Dicots	Long	C3	Non-legumes	10	10	13.381	3.582	8.608	4.446
55	211	Pandey and Garg	2017	Non saline	Funneliformis mosseae	Funneliformis	Cajanus cajan	Fabaceae	Herbaceous	Perennial	Shrub	Dicots	Long	C3	Legumes	6	6	7.22124	0.780368	5.68142	0.91043
55	212	Pandey and Garg	2017	Non saline	Funneliformis mosseae	Funneliformis	Cajanus cajan	Fabaceae	Herbaceous	Perennial	Shrub	Dicots	Long	C3	Legumes	6	6	7.9646	4.16196	6.15929	1.04049
55	213	Pandey and Garg	2017	Non saline	Rhizophagus irregularis	Rhizophagus	Cajanus cajan	Fabaceae	Herbaceous	Perennial	Shrub	Dicots	Long	C3	Legumes	6	6	8.33628	1.56074	6.15929	1.04049
55	214	Pandey and Garg	2017	Non saline	Rhizophagus irregularis	Rhizophagus	Cajanus cajan	Fabaceae	Herbaceous	Perennial	Shrub	Dicots	Long	C3	Legumes	6	6	6.84956	3.12147	5.68142	0.91043
55	215	Pandey and Garg	2017	Low	Funneliformis mosseae	Funneliformis	Cajanus cajan	Fabaceae	Herbaceous	Perennial	Shrub	Dicots	Long	C3	Legumes	6	6	4.99115	0.780368	3.45133	0.91043
55	216	Pandey and Garg	2017	Low	Funneliformis mosseae	Funneliformis	Cajanus cajan	Fabaceae	Herbaceous	Perennial	Shrub	Dicots	Long	C3	Legumes	6	6	3.87611	0.650307	2.60177	0.390184
55	217	Pandey and Garg	2017	Low	Funneliformis mosseae	Funneliformis	Cajanus cajan	Fabaceae	Herbaceous	Perennial	Shrub	Dicots	Long	C3	Legumes	6	6	6.84956	1.17055	4.72566	1.43068
55	218	Pandey and Garg	2017	Low	Funneliformis mosseae	Funneliformis	Cajanus cajan	Fabaceae	Herbaceous	Perennial	Shrub	Dicots	Long	C3	Legumes	6	6	6.10619	1.43068	3.9823	1.17055
55	219	Pandey and Garg	2017	Low	Rhizophagus irregularis	Rhizophagus	Cajanus cajan	Fabaceae	Herbaceous	Perennial	Shrub	Dicots	Long	C3	Legumes	6	6	4.56637	0.520246	2.60177	0.390184
55	220	Pandey and Garg	2017	Low	Rhizophagus irregularis	Rhizophagus	Cajanus cajan	Fabaceae	Herbaceous	Perennial	Shrub	Dicots	Long	C3	Legumes	6	6	8.17699	1.04049	4.72566	1.43068
55	221	Pandey and Garg	2017	Low	Rhizophagus irregularis	Rhizophagus	Cajanus cajan	Fabaceae	Herbaceous	Perennial	Shrub	Dicots	Long	C3	Legumes	6	6	5.30973	0.780368	3.45133	0.91043
55	222	Pandey and Garg	2017	Low	Rhizophagus irregularis	Rhizophagus	Cajanus cajan	Fabaceae	Herbaceous	Perennial	Shrub	Dicots	Long	C3	Legumes	6	6	7.32743	3.90184	3.9823	1.17055
55	223	Pandey and Garg	2017	Moderate	Funneliformis mosseae	Funneliformis	Cajanus cajan	Fabaceae	Herbaceous	Perennial	Shrub	Dicots	Long	C3	Legumes	6	6	4.61947	1.17055	2.86726	1.04049
55	224	Pandey and Garg	2017	Moderate	Funneliformis mosseae	Funneliformis	Cajanus cajan	Fabaceae	Herbaceous	Perennial	Shrub	Dicots	Long	C3	Legumes	6	6	2.0708	0.650307	1.27434	0.780368
55	225	Pandey and Garg	2017	Moderate	Rhizophagus irregularis	Rhizophagus	Cajanus cajan	Fabaceae	Herbaceous	Perennial	Shrub	Dicots	Long	C3	Legumes	6	6	2.70796	0.520246	1.27434	0.780368
55	226	Pandey and Garg	2017	Moderate	Rhizophagus irregularis	Rhizophagus	Cajanus cajan	Fabaceae	Herbaceous	Perennial	Shrub	Dicots	Long	C3	Legumes	6	6	5.68142	1.17055	2.86726	1.04049
56	227	Peng et al.	2011	Non saline	Funneliformis mosseae	Funneliformis	Astragalus sinicus	Fabaceae	Herbaceous	Annual/Perennial	Forb/Shrub	Dicots	Long	C3	Legumes	3	3	0.261	0.138564	0.105	0.0433013
56	228	Peng et al.	2011	Non saline	Rhizoglomus clarum	Rhizoglomus	Astragalus sinicus	Fabaceae	Herbaceous	Annual/Perennial	Forb/Shrub	Dicots	Long	C3	Legumes	3	3	0.302	0.129904	0.15	0.0779423
56	229	Peng et al.	2011	Non saline	Rhizophagus intraradices	Rhizophagus	Astragalus sinicus	Fabaceae	Herbaceous	Annual/Perennial	Forb/Shrub	Dicots	Long	C3	Legumes	3	3	0.311	0.0433013	0.15	0.0779423
56	230	Peng et al.	2011	Low	Funneliformis mosseae	Funneliformis	Astragalus sinicus	Fabaceae	Herbaceous	Annual/Perennial	Forb/Shrub	Dicots	Long	C3	Legumes	3	3	0.1505	0.0311769	0.1019	0.0155885
56	231	Peng et al.	2011	Low	Funneliformis mosseae	Funneliformis	Astragalus sinicus	Fabaceae	Herbaceous	Annual/Perennial	Forb/Shrub	Dicots	Long	C3	Legumes	3	3	0.12	0.0259808	0.1009	0.0121244
56	232	Peng et al.	2011	Low	Funneliformis mosseae	Funneliformis	Astragalus sinicus	Fabaceae	Herbaceous	Annual/Perennial	Forb/Shrub	Dicots	Long	C3	Legumes	3	3	0.211	0.112583	0.103	0.069282
56	233	Peng et al.	2011	Low	Rhizoglomus clarum	Rhizoglomus	Astragalus sinicus	Fabaceae	Herbaceous	Annual/Perennial	Forb/Shrub	Dicots	Long	C3	Legumes	3	3	0.191	0.0259808	0.1019	0.0155885
56	234	Peng et al.	2011	Low	Rhizoglomus clarum	Rhizoglomus	Astragalus sinicus	Fabaceae	Herbaceous	Annual/Perennial	Forb/Shrub	Dicots	Long	C3	Legumes	3	3	0.141	0.0259808	0.1009	0.0121244
56	235	Peng et al.	2011	Low	Rhizoglomus clarum	Rhizoglomus	Astragalus sinicus	Fabaceae	Herbaceous	Annual/Perennial	Forb/Shrub	Dicots	Long	C3	Legumes	3	3	0.241	0.138564	0.103	0.0623538
56	236	Peng et al.	2011	Low	Rhizophagus intraradices	Rhizophagus	Astragalus sinicus	Fabaceae	Herbaceous	Annual/Perennial	Forb/Shrub	Dicots	Long	C3	Legumes	3	3	0.287	0.0381051	0.193	0.069282
56	237	Peng et al.	2011	Low	Rhizophagus intraradices	Rhizophagus	Astragalus sinicus	Fabaceae	Herbaceous	Annual/Perennial	Forb/Shrub	Dicots	Long	C3	Legumes	3	3	0.269	0.0363731	0.1019	0.0155885
56	238	Peng et al.	2011	Low	Rhizophagus intraradices	Rhizophagus	Astragalus sinicus	Fabaceae	Herbaceous	Annual/Perennial	Forb/Shrub	Dicots	Long	C3	Legumes	3	3	0.241	0.129904	0.1009	0.0121244
57	239	Porcel et al.	2015	Non saline	Claroideoglomus etunicatum	Claroideoglomus	Oryza sativa	Poaceae	Herbaceous	Annual	Grass	Monocots	Moderate	C3	Non-legumes	15	15	0.4222	0.108444	0.313	0.130984
57	240	Porcel et al.	2015	Low	Claroideoglomus etunicatum	Claroideoglomus	Oryza sativa	Poaceae	Herbaceous	Annual	Grass	Monocots	Moderate	C3	Non-legumes	15	15	0.342	0.0774597	0.168	0.0154919
57	241	Porcel et al.	2015	Moderate	Claroideoglomus etunicatum	Claroideoglomus	Oryza sativa	Poaceae	Herbaceous	Annual	Grass	Monocots	Moderate	C3	Non-legumes	15	15	0.393	0.142603	0.2155	0.154919
58	242	Porcel et al.	2016	Non saline	Claroideoglomus etunicatum	Claroideoglomus	Oryza sativa	Poaceae	Herbaceous	Annual	Grass	Monocots	Moderate	C3	Non-legumes	5	5	0.59	0.165245	0.42	0.165245
58	243	Porcel et al.	2016	Low	Claroideoglomus etunicatum	Claroideoglomus	Oryza sativa	Poaceae	Herbaceous	Annual	Grass	Monocots	Moderate	C3	Non-legumes	5	5	0.57	0.213768	0.35	0.213768
58	244	Porcel et al.	2016	Moderate	Claroideoglomus etunicatum	Claroideoglomus	Oryza sativa	Poaceae	Herbaceous	Annual	Grass	Monocots	Moderate	C3	Non-legumes	5	5	0.53	0.174861	0.35	0.174861
59	245	Porras-Soriano et al.	2009	Non saline	Claroideoglomus claroideum	Claroideoglomus	Olea europaea	Oleaceae	Woody	Perennial	Tree	Dicots	Long	C3	Non-legumes	50	50	4.97	7.02864	3	7.02864
59	246	Porras-Soriano et al.	2009	Non saline	Funneliformis mosseae	Funneliformis	Olea europaea	Oleaceae	Woody	Perennial	Tree	Dicots	Long	C3	Non-legumes	50	50	7.89	17.4585	3	17.4585
59	247	Porras-Soriano et al.	2009	Non saline	Rhizophagus irregularis	Rhizophagus	Olea europaea	Oleaceae	Woody	Perennial	Tree	Dicots	Long	C3	Non-legumes	50	50	4.94	6.92258	3	6.92258
59	248	Porras-Soriano et al.	2009	High	Rhizophagus irregularis	Rhizophagus	Olea europaea	Oleaceae	Woody	Perennial	Tree	Dicots	Long	C3	Non-legumes	50	50	3.95	1.35391	1.89	1.35391
59	249	Porras-Soriano et al.	2009	High	Claroideoglomus claroideum	Claroideoglomus	Olea europaea	Oleaceae	Woody	Perennial	Tree	Dicots	Long	C3	Non-legumes	50	50	4.05	1.70746	1.89	1.70746
59	250	Porras-Soriano et al.	2009	High	Funneliformis mosseae	Funneliformis	Olea europaea	Oleaceae	Woody	Perennial	Tree	Dicots	Long	C3	Non-legumes	50	50	6.41	1.13618	4.89	1.13618
61	251	Rabie et al.	2005	Non saline	Rhizoglomus clarum	Rhizoglomus	Vigna sinensis	Fabaceae	Herbaceous	Annual	Herb	Dicots	Long	C3	Legumes	5	5	2.04	0.880102	0.880102	0.0880102
61	252	Rabie et al.	2005	Low	Rhizoglomus clarum	Rhizoglomus	Vigna sinensis	Fabaceae	Herbaceous	Annual	Herb	Dicots	Long	C3	Legumes	5	5	1.1	0.17052	0.705197	0.17052
61	253	Rabie et al.	2005	Low	Rhizoglomus clarum	Rhizoglomus	Vigna sinensis	Fabaceae	Herbaceous	Annual	Herb	Dicots	Long	C3	Legumes	5	5	1.91	0.357541	0.357541	0.357541
61	254	Rabie et al.	2005	Low	Rhizoglomus clarum	Rhizoglomus	Vigna sinensis	Fabaceae	Herbaceous	Annual	Herb	Dicots	Long	C3	Legumes	5	5	2.15	1.05887	1.21177	0.317662
61	255	Rabie et al.	2005	Low	Rhizoglomus clarum	Rhizoglomus	Vigna sinensis	Fabaceae	Herbaceous	Annual	Herb	Dicots	Long	C3	Legumes	5	5	2.23	1.16613	1.14577	0.21865
62	256	Rabie	2005	Non saline	Rhizoglomus clarum	Rhizoglomus	Vigna radiata	Fabaceae	Herbaceous	Annual	Herb	Dicots	Long	C3	Legumes	4	4	10.9	6.68774	3.6	0.68774
62	257	Rabie	2005	High	Rhizoglomus clarum	Rhizoglomus	Vigna radiata	Fabaceae	Herbaceous	Annual	Herb	Dicots	Long	C3	Legumes	4	4	13.3	2.68774	7.7	3.68774
62	258	Rabie	2005	High	Rhizoglomus clarum	Rhizoglomus	Vigna radiata	Fabaceae	Herbaceous	Annual	Herb	Dicots	Long	C3	Legumes	4	4	10.1	1.68774	4.9	1.68774
62	259	Rabie	2005	High	Rhizoglomus clarum	Rhizoglomus	Vigna radiata	Fabaceae	Herbaceous	Annual	Herb	Dicots	Long	C3	Legumes	4	4	6.7	1.68774	3.1	1.68774
63	260	Rinaldelli & Mancuso	2017	Non saline	Funneliformis mosseae	Funneliformis	Olea europaea	Oleaceae	Woody	Perennial	Shrub/Tree	Dicots	Long	C3	Non-legumes	5	5	1355.77	758.24	465.659	206.04
63	261	Rinaldelli & Mancuso	2017	Low	Funneliformis mosseae	Funneliformis	Olea europaea	Oleaceae	Woody	Perennial	Shrub/Tree	Dicots	Long	C3	Non-legumes	5	5	1384.62	659.336	490.384	45.329
63	262	Rinaldelli & Mancuso	2017	Low	Funneliformis mosseae	Funneliformis	Olea europaea	Oleaceae	Woody	Perennial	Shrub/Tree	Dicots	Long	C3	Non-legumes	5	5	1182.69	593.4	366.758	164.835
63	263	Rinaldelli & Mancuso	2017	Low	Funneliformis mosseae	Funneliformis	Olea europaea	Oleaceae	Woody	Perennial	Shrub/Tree	Dicots	Long	C3	Non-legumes	5	5	1347.53	692.304	457.417	206.04
63	264	Rinaldelli & Mancuso	2017	Moderate	Funneliformis mosseae	Funneliformis	Olea europaea	Oleaceae	Woody	Perennial	Shrub/Tree	Dicots	Long	C3	Non-legumes	5	5	1087.91	560.432	271.978	41.208
64	265	Wu & Zou	2009	Non saline	Funneliformis mosseae	Funneliformis	Citrus tangerine	Rutaceae	Woody	Perennial	Tree	Dicots	Long	C3	Non-legumes	3	3	0.31	0.0363731	0.25	0.0363731
64	266	Wu & Zou	2009	Non saline	Paraglomus occultum	Paraglomus	Citrus tangerine	Rutaceae	Woody	Perennial	Tree	Dicots	Long	C3	Non-legumes	3	3	0.32	0.0433013	0.25	0.0433013
64	267	Wu & Zou	2009	Moderate	Funneliformis mosseae	Funneliformis	Citrus tangerine	Rutaceae	Woody	Perennial	Tree	Dicots	Long	C3	Non-legumes	3	3	0.26	0.0433013	0.19	0.0433013
64	268	Wu & Zou	2009	Moderate	Paraglomus occultum	Paraglomus	Citrus tangerine	Rutaceae	Woody	Perennial	Tree	Dicots	Long	C3	Non-legumes	3	3	0.26	0.0433013	0.19	0.0433013
66	269	Yamato et al.	2008	Non saline	Rhizophagus intraradices	Rhizophagus	Sorghum bicolor	Poaceae	Herbaceous	Perennial	Grass	Monocots	Long	C4	Non-legumes	6	6	2.475	2.169	0.502	2.169
66	270	Yamato et al.	2008	Non saline	Rhizophagus intraradices	Rhizophagus	Sorghum bicolor	Poaceae	Herbaceous	Perennial	Grass	Monocots	Long	C4	Non-legumes	6	6	2.726	2.44494	0.502	2.44494
66	271	Yamato et al.	2008	Non saline	Rhizophagus intraradices	Rhizophagus	Sorghum bicolor	Poaceae	Herbaceous	Perennial	Grass	Monocots	Long	C4	Non-legumes	6	6	3.248	3.0188	0.9502	3.0188
66	272	Yamato et al.	2008	Moderate	Rhizophagus intraradices	Rhizophagus	Sorghum bicolor	Poaceae	Herbaceous	Perennial	Grass	Monocots	Long	C4	Non-legumes	6	6	1.991	1.61494	0.522	1.61494
66	273	Yamato et al.	2008	Moderate	Rhizophagus intraradices	Rhizophagus	Sorghum bicolor	Poaceae	Herbaceous	Perennial	Grass	Monocots	Long	C4	Non-legumes	6	6	2.301	1.95573	0.522	1.95573
66	274	Yamato et al.	2008	Moderate	Rhizophagus intraradices	Rhizophagus	Sorghum bicolor	Poaceae	Herbaceous	Perennial	Grass	Monocots	Long	C4	Non-legumes	6	6	2.687	2.38008	0.522	2.38008
66	275	Yamato et al.	2008	Moderate	Rhizophagus intraradices	Rhizophagus	Sorghum bicolor	Poaceae	Herbaceous	Perennial	Grass	Monocots	Long	C4	Non-legumes	6	6	1.314	1.25325	0.74	1.25325
66	276	Yamato et al.	2008	Moderate	Rhizophagus intraradices	Rhizophagus	Sorghum bicolor	Poaceae	Herbaceous	Perennial	Grass	Monocots	Long	C4	Non-legumes	6	6	1.334	1.27524	0.74	1.27524
66	277	Yamato et al.	2008	Moderate	Rhizophagus intraradices	Rhizophagus	Sorghum bicolor	Poaceae	Herbaceous	Perennial	Grass	Monocots	Long	C4	Non-legumes	6	6	1.8563	1.84943	1.174	1.84943
67	278	Younesi et al.	2013	Non saline	Funneliformis mosseae	Funneliformis	Glycine max	Fabaceae	Herbaceous	Annual	Herb	Dicots	Long	C3	Legumes	4	4	13.6	4.8	11.3	5.76
67	279	Zhang et al.	2014	Non saline	Funneliformis mosseae	Funneliformis	Kosteletzkya virginica	Malvaceae	Woody	Perennial	Shrub	Dicots	Long	C3	Non-legumes	3	3	0.32	0.0519615	0.24	0.155885
67	280	Younesi et al.	2013	Low	Funneliformis mosseae	Funneliformis	Glycine max	Fabaceae	Herbaceous	Annual	Herb	Dicots	Long	C3	Legumes	4	4	10.6	6	7.9	1.1
67	281	Younesi et al.	2013	Moderate	Funneliformis mosseae	Funneliformis	Glycine max	Fabaceae	Herbaceous	Annual	Herb	Dicots	Long	C3	Legumes	4	4	9.4	1.13	6.3	0.65
67	282	Zhang et al.	2014	Moderate	Funneliformis mosseae	Funneliformis	Kosteletzkya virginica	Malvaceae	Woody	Perennial	Shrub	Dicots	Long	C3	Non-legumes	3	3	0.24	0.0866025	0.14	0.0866025
68	283	ZhongQun et al.	2010	Non saline	Funneliformis mosseae	Funneliformis	Solanum lycopersicum	Solanaceae	Herbaceous	Annual	Herb	Dicots	Long	C3	Non-legumes	6	6	6.26	2.46253	5.98	2.77035
68	284	ZhongQun et al.	2010	High	Funneliformis mosseae	Funneliformis	Solanum lycopersicum	Solanaceae	Herbaceous	Annual	Herb	Dicots	Long	C3	Non-legumes	6	6	5.38	2.63842	5.08	2.96823
68	285	ZhongQun et al.	2010	High	Funneliformis mosseae	Funneliformis	Solanum lycopersicum	Solanaceae	Herbaceous	Annual	Herb	Dicots	Long	C3	Non-legumes	6	6	5.64	2.81432	5.32	3.16611
69	286	Zhu et al.	2016	Non saline	Rhizophagus irregularis	Rhizophagus	Triticum aestivum	Poaceae	Herbaceous	Annual	Herb	Monocots	Long	C3	Non-legumes	4	4	10.3	1.68	6.6	0.62
69	287	Zhu et al.	2016	Low	Rhizophagus irregularis	Rhizophagus	Triticum aestivum	Poaceae	Herbaceous	Annual	Herb	Monocots	Long	C3	Non-legumes	4	4	8.62	1.38	6.84	4.2
69	288	Zhu et al.	2016	Moderate	Rhizophagus irregularis	Rhizophagus	Triticum aestivum	Poaceae	Herbaceous	Annual	Herb	Monocots	Long	C3	Non-legumes	4	4	7.06	1.38	5.08	1.18
70	289	Zhu et al.	2018	Non saline	Rhizophagus irregularis	Rhizophagus	Triticum aestivum	Poaceae	Herbaceous	Annual	Herb	Monocots	Long	C3	Non-legumes	4	4	7.11	3.1	7.41	1.3
70	290	Zhu et al.	2018	Low	Rhizophagus irregularis	Rhizophagus	Triticum aestivum	Poaceae	Herbaceous	Annual	Herb	Monocots	Long	C3	Non-legumes	4	4	6.12	1.7	4.64	3.06
70	291	Zhu et al.	2018	Moderate	Rhizophagus irregularis	Rhizophagus	Triticum aestivum	Poaceae	Herbaceous	Annual	Herb	Monocots	Long	C3	Non-legumes	4	4	6.3	2.7	3.63	0.78
71	292	Zou and Wu	2011	Non saline	Diversispora versiformis	Diversispora	Poncirus trifoliata	Rutaceae	Woody	Perennial	Shrub	Dicots	Long	C3	Non-legumes	3	3	0.37	0.187151	0.31	0.0374303
71	293	Zou and Wu	2011	Non saline	Funneliformis mosseae	Funneliformis	Poncirus trifoliata	Rutaceae	Woody	Perennial	Shrub	Dicots	Long	C3	Non-legumes	3	3	0.42	0.0686221	0.31	0.0686221
71	294	Zou and Wu	2011	Moderate	Diversispora versiformis	Diversispora	Poncirus trifoliata	Rutaceae	Woody	Perennial	Shrub	Dicots	Long	C3	Non-legumes	3	3	0.33	0.0436686	0.26	0.0436686
71	295	Zou and Wu	2011	Moderate	Funneliformis mosseae	Funneliformis	Poncirus trifoliata	Rutaceae	Woody	Perennial	Shrub	Dicots	Long	C3	Non-legumes	3	3	0.38	0.0748605	0.26	0.0748605
73	296	Zuccarini & Okurowska	2008	Non saline	Rhizophagus intraradices	Rhizophagus	Ocimum basilicum	Lamiaceae	Herbaceous	Annual/Perennial	Herb	Dicots	Long	C3	Non-legumes	3	3	35.55	3.92394	29.26	3.92394
73	297	Zuccarini & Okurowska	2008	Moderate	Rhizophagus intraradices	Rhizophagus	Ocimum basilicum	Lamiaceae	Herbaceous	Annual/Perennial	Herb	Dicots	Long	C3	Non-legumes	3	3	33.79	7.42991	21.88	7.42991
74	298	Jahromi et al.	2007	Non saline	Rhizophagus irregularis	Rhizophagus	Lactuca sativa	Asteraceae	Herbaceous	Annual	Forb	Dicots	Long	C3	Non-legumes	6	6	1.206	0.660382	0.993	0.178813
74	299	Jahromi et al.	2007	Low	Rhizophagus irregularis	Rhizophagus	Lactuca sativa	Asteraceae	Herbaceous	Annual	Forb	Dicots	Long	C3	Non-legumes	6	6	0.508	0.0808332	0.401	0.0808332
74	300	Jahromi et al.	2007	Moderate	Rhizophagus irregularis	Rhizophagus	Lactuca sativa	Asteraceae	Herbaceous	Annual	Forb	Dicots	Long	C3	Non-legumes	6	6	0.483	0.206418	0.405718	0.0550223
75	301	Kaya et al.	2009	Non saline	Rhizoglomus clarum	Rhizoglomus	Capsicum annuum	Solanaceae	Herbaceous	Annual/Perennial	Forb/Shrub	Dicots	Moderate	C3	Non-legumes	3	3	50.4	23.9592	45.6	26.9541
75	302	Kaya et al.	2009	Low	Rhizoglomus clarum	Rhizoglomus	Capsicum annuum	Solanaceae	Herbaceous	Annual/Perennial	Forb/Shrub	Dicots	Moderate	C3	Non-legumes	3	3	39.7	19.654	33.4	3.93081
75	303	Kaya et al.	2009	Moderate	Rhizoglomus clarum	Rhizoglomus	Capsicum annuum	Solanaceae	Herbaceous	Annual/Perennial	Forb/Shrub	Dicots	Moderate	C3	Non-legumes	3	3	32.7	5.80262	23.4	5.80262
78	304	Kohler et al.	2010	Non saline	Funneliformis mosseae	Funneliformis	Lactuca sativa	Asteraceae	Herbaceous	Annual	Forb	Dicots	Long	C3	Non-legumes	5	5	1.46	0.536656	1.48	0.804984
78	305	Kohler et al.	2010	Moderate	Funneliformis mosseae	Funneliformis	Lactuca sativa	Asteraceae	Herbaceous	Annual	Forb	Dicots	Long	C3	Non-legumes	5	5	1.21	0.536656	0.84	0.402492
78	306	Kohler et al.	2010	High	Funneliformis mosseae	Funneliformis	Lactuca sativa	Asteraceae	Herbaceous	Annual	Forb	Dicots	Long	C3	Non-legumes	5	5	1.05	0.536656	0.83	0.402492
79	307	Kohler et al.	2009	Non saline	Funneliformis mosseae	Funneliformis	Lactuca sativa	Asteraceae	Herbaceous	Annual	Forb	Dicots	Moderate	C3	Non-legumes	5	5	1.46	0.246173	1.48	0.307716
79	308	Kohler et al.	2009	Non saline	Rhizophagus irregularis	Rhizophagus	Lactuca sativa	Asteraceae	Herbaceous	Annual	Forb	Dicots	Moderate	C3	Non-legumes	5	5	1.42	0.738518	1.48	0.923147
79	309	Kohler et al.	2009	Moderate	Funneliformis mosseae	Funneliformis	Lactuca sativa	Asteraceae	Herbaceous	Annual	Forb	Dicots	Moderate	C3	Non-legumes	5	5	1.21	0.359715	0.84	0.359715
79	310	Kohler et al.	2009	Moderate	Rhizophagus irregularis	Rhizophagus	Lactuca sativa	Asteraceae	Herbaceous	Annual	Forb	Dicots	Moderate	C3	Non-legumes	5	5	1.3	0.447214	0.84	0.447214
79	311	Kohler et al.	2009	High	Funneliformis mosseae	Funneliformis	Lactuca sativa	Asteraceae	Herbaceous	Annual	Forb	Dicots	Moderate	C3	Non-legumes	5	5	1.05	0.225658	0.83	0.225658
79	312	Kohler et al.	2009	High	Rhizophagus irregularis	Rhizophagus	Lactuca sativa	Asteraceae	Herbaceous	Annual	Forb	Dicots	Moderate	C3	Non-legumes	5	5	1.11	0.287201	0.83	0.287201
80	313	Latefa and Chaoxingb	2011	Non saline	Funneliformis mosseae	Funneliformis	Solanum lycopersicum	Solanaceae	Herbaceous	Annual	Forb	Dicots	Long	C3	Non-legumes	6	6	14.22	6.79437	8.04	6.79437
80	314	Latefa and Chaoxingb	2011	Low	Funneliformis mosseae	Funneliformis	Solanum lycopersicum	Solanaceae	Herbaceous	Annual	Forb	Dicots	Long	C3	Non-legumes	6	6	13.8	8.50945	6.06	8.50945
80	315	Latefa and Chaoxingb	2011	Moderate	Funneliformis mosseae	Funneliformis	Solanum lycopersicum	Solanaceae	Herbaceous	Annual	Forb	Dicots	Long	C3	Non-legumes	6	6	5.64	2.49567	3.37	2.49567
81	316	Lin et al.	2017	Non saline	Funneliformis mosseae	Funneliformis	Leymus chinensis	Poaceae	Herbaceous	Perennial	Grass	Monocots	Short	C3	Non-legumes	6	6	4.86022	0.895512	3.41935	0.737481
81	317	Lin et al.	2017	Moderate	Funneliformis mosseae	Funneliformis	Leymus chinensis	Poaceae	Herbaceous	Perennial	Grass	Monocots	Short	C3	Non-legumes	6	6	3.07527	0.526772	2.36559	0.263386
81	318	Lin et al.	2017	Moderate	Funneliformis mosseae	Funneliformis	Leymus chinensis	Poaceae	Herbaceous	Perennial	Grass	Monocots	Short	C3	Non-legumes	6	6	3.72043	0.895512	2.62366	0.421418
92	319	Sheng et al.	2008	Non saline	Funneliformis mosseae	Funneliformis	Zea mays	Poaceae	Herbaceous	Annual	Grass	Monocots	Long	C3	Non-legumes	5	5	6.15	1.86	4.07	2.57
92	320	Sheng et al.	2008	Low	Funneliformis mosseae	Funneliformis	Zea mays	Poaceae	Herbaceous	Annual	Grass	Monocots	Long	C3	Non-legumes	5	5	5.55	0.95	2.9	0.39
92	321	Sheng et al.	2008	Low	Funneliformis mosseae	Funneliformis	Zea mays	Poaceae	Herbaceous	Annual	Grass	Monocots	Long	C3	Non-legumes	5	5	3.69	1	1.43	0.45
92	322	Sheng et al.	2008	Moderate	Funneliformis mosseae	Funneliformis	Zea mays	Poaceae	Herbaceous	Annual	Grass	Monocots	Long	C3	Non-legumes	5	5	3.57	0.9	1.38	0.33
92	323	Sheng et al.	2008	Moderate	Funneliformis mosseae	Funneliformis	Zea mays	Poaceae	Herbaceous	Annual	Grass	Monocots	Long	C3	Non-legumes	5	5	1.76	0.88	0.83	0.13
93	324	Sheng et al.	2011	Non saline	Funneliformis mosseae	Funneliformis	Zea mays	Poaceae	Herbaceous	Annual	Grass	Monocots	Long	C3	Non-legumes	5	5	8.56051	1.03185	4.31847	1.72611
93	325	Sheng et al.	2011	Low	Funneliformis mosseae	Funneliformis	Zea mays	Poaceae	Herbaceous	Annual	Grass	Monocots	Long	C3	Non-legumes	5	5	7.83439	1.18471	4.08917	0.458599
93	326	Sheng et al.	2011	Low	Funneliformis mosseae	Funneliformis	Zea mays	Poaceae	Herbaceous	Annual	Grass	Monocots	Long	C3	Non-legumes	5	5	5.3121	1.07006	2.48408	0.420382
94	327	Shokri and Maadi	2009	Low	Rhizophagus irregularis	Rhizophagus	Trifolium alexandrium	Fabaceae	Herbaceous	Annual	Forb	Dicots	Long	C3	Legumes	3	3	1.82	0.894163	0.39	0.8
94	328	Shokri and Maadi	2009	Low	Rhizophagus irregularis	Rhizophagus	Trifolium alexandrium	Fabaceae	Herbaceous	Annual	Forb	Dicots	Long	C3	Legumes	3	3	1.59	0.825382	0.27	0.7
94	329	Shokri and Maadi	2009	Moderate	Rhizophagus irregularis	Rhizophagus	Trifolium alexandrium	Fabaceae	Herbaceous	Annual	Forb	Dicots	Long	C3	Legumes	3	3	1.38	0.71283	0.24	0.2
95	330	Tian et al.	2004	Non saline	Funneliformis mosseae	Funneliformis	Gossypium arboreum	Malvaceae	Woody	Perennial	Tree	Dicots	Long	C3	Non-legumes	3	3	6.46	0.866025	6.01	3.58535
95	331	Tian et al.	2004	Non saline	Funneliformis mosseae	Funneliformis	Gossypium arboreum	Malvaceae	Woody	Perennial	Tree	Dicots	Long	C3	Non-legumes	3	3	6.44	3.60267	6.01	3.58535
95	332	Tian et al.	2004	Low	Funneliformis mosseae	Funneliformis	Gossypium arboreum	Malvaceae	Woody	Perennial	Tree	Dicots	Long	C3	Non-legumes	3	3	5.89	0.640859	5.54	2.07846
95	333	Tian et al.	2004	Low	Funneliformis mosseae	Funneliformis	Gossypium arboreum	Malvaceae	Woody	Perennial	Tree	Dicots	Long	C3	Non-legumes	3	3	6.06	2.49415	5.54	2.07846
95	334	Tian et al.	2004	Moderate	Funneliformis mosseae	Funneliformis	Gossypium arboreum	Malvaceae	Woody	Perennial	Tree	Dicots	Long	C3	Non-legumes	3	3	4.91	0.623538	4.91	0.588897
95	335	Tian et al.	2004	Moderate	Funneliformis mosseae	Funneliformis	Gossypium arboreum	Malvaceae	Woody	Perennial	Tree	Dicots	Long	C3	Non-legumes	3	3	4.06	0.623538	3.09	0.34641
95	336	Tian et al.	2004	Moderate	Funneliformis mosseae	Funneliformis	Gossypium arboreum	Malvaceae	Woody	Perennial	Tree	Dicots	Long	C3	Non-legumes	3	3	5.19	1.45492	3.09	0.34641
95	337	Tian et al.	2004	Moderate	Funneliformis mosseae	Funneliformis	Gossypium arboreum	Malvaceae	Woody	Perennial	Tree	Dicots	Long	C3	Non-legumes	3	3	5.81	1.87061	4.91	0.588897
97	338	Turkmen et al.	2007	Non saline	Gigaspora margarita	Gigaspora	Capsicum annuum	Solanaceae	Herbaceous	Annual/Perennial	Forb/Shrub	Dicots	Long	C3	Non-legumes	4	4	0.223	0.0305666	0.163	0.0305666
97	339	Turkmen et al.	2007	Non saline	Rhizophagus irregularis	Rhizophagus	Capsicum annuum	Solanaceae	Herbaceous	Annual/Perennial	Forb/Shrub	Dicots	Long	C3	Non-legumes	4	4	0.245	0.0305666	0.163	0.0305666
97	340	Turkmen et al.	2007	Low	Gigaspora margarita	Gigaspora	Capsicum annuum	Solanaceae	Herbaceous	Annual/Perennial	Forb/Shrub	Dicots	Long	C3	Non-legumes	4	4	0.193	0.0305666	0.135	0.0305666
97	341	Turkmen et al.	2007	Low	Rhizophagus irregularis	Rhizophagus	Capsicum annuum	Solanaceae	Herbaceous	Annual/Perennial	Forb/Shrub	Dicots	Long	C3	Non-legumes	4	4	0.183	0.0305666	0.135	0.0305666
98	342	Wang et al.	2018	Non saline	Diversispora versiformis	Diversispora	Chrysanthemum morifolium	Asteraceae	Herbaceous	Perennial	Forb	Dicots	Long	C3	Non-legumes	5	5	3.03686	0.758175	1.35627	0.527426
98	343	Wang et al.	2018	Non saline	Funneliformis mosseae	Funneliformis	Chrysanthemum morifolium	Asteraceae	Herbaceous	Perennial	Forb	Dicots	Long	C3	Non-legumes	5	5	2.29975	0.428534	1.35627	0.527426
98	344	Wang et al.	2018	Low	Diversispora versiformis	Diversispora	Chrysanthemum morifolium	Asteraceae	Herbaceous	Perennial	Forb	Dicots	Long	C3	Non-legumes	5	5	4.05405	0.922996	1.72482	0.758175
98	345	Wang et al.	2018	Low	Funneliformis mosseae	Funneliformis	Chrysanthemum morifolium	Asteraceae	Herbaceous	Perennial	Forb	Dicots	Long	C3	Non-legumes	5	5	3.53808	0.758175	1.72482	0.758175
98	346	Wang et al.	2018	Moderate	Diversispora versiformis	Diversispora	Chrysanthemum morifolium	Asteraceae	Herbaceous	Perennial	Forb	Dicots	Long	C3	Non-legumes	5	5	1.07617	0.95596	0.958231	0.79114
98	347	Wang et al.	2018	Moderate	Funneliformis mosseae	Funneliformis	Chrysanthemum morifolium	Asteraceae	Herbaceous	Perennial	Forb	Dicots	Long	C3	Non-legumes	5	5	0.958231	0.824104	0.958231	0.79114
99	348	Wang et al.	2019	Non saline	Diversispora versiformis	Diversispora	Zelkova serrata	Ulmaceae	Woody	Perennial	Tree	Dicots	Long	C3	Non-legumes	24	24	23.3	24.9848	18.6	8.32827
99	349	Wang et al.	2019	Non saline	Funneliformis mosseae	Funneliformis	Zelkova serrata	Ulmaceae	Woody	Perennial	Tree	Dicots	Long	C3	Non-legumes	24	24	19.7	15.6767	18.6	8.32827
99	350	Wang et al.	2019	Non saline	Funneliformis mosseae	Funneliformis	Zelkova serrata	Ulmaceae	Woody	Perennial	Tree	Dicots	Long	C3	Non-legumes	24	24	21.2	18.1262	18.6	8.32827
99	351	Wang et al.	2019	Moderate	Diversispora versiformis	Diversispora	Zelkova serrata	Ulmaceae	Woody	Perennial	Tree	Dicots	Long	C3	Non-legumes	24	24	14.2	4.40908	14	6.85857
99	352	Wang et al.	2019	Moderate	Funneliformis mosseae	Funneliformis	Zelkova serrata	Ulmaceae	Woody	Perennial	Tree	Dicots	Long	C3	Non-legumes	24	24	16.9	4.89898	14	6.85857
99	353	Wang et al.	2019	Moderate	Funneliformis mosseae	Funneliformis	Zelkova serrata	Ulmaceae	Woody	Perennial	Tree	Dicots	Long	C3	Non-legumes	24	24	15	7.34847	14	6.85857
100	354	Wu and Zou	2009	Non saline	Funneliformis mosseae	Funneliformis	Citrus tangerine	Rutaceae	Woody	Perennial	Tree	Dicots	Long	C3	Non-legumes	3	3	0.31	0.0375173	0.25	0.0375173
100	355	Wu and Zou	2009	Non saline	Paraglomus occultum	Paraglomus	Citrus tangerine	Rutaceae	Woody	Perennial	Tree	Dicots	Long	C3	Non-legumes	3	3	0.32	0.0437702	0.25	0.0437702
100	356	Wu and Zou	2009	Moderate	Funneliformis mosseae	Funneliformis	Citrus tangerine	Rutaceae	Woody	Perennial	Tree	Dicots	Long	C3	Non-legumes	3	3	0.26	0.0437702	0.19	0.0437702
100	357	Wu and Zou	2009	Moderate	Paraglomus occultum	Paraglomus	Citrus tangerine	Rutaceae	Woody	Perennial	Tree	Dicots	Long	C3	Non-legumes	3	3	0.26	0.0437702	0.19	0.0437702
102	358	Wu et al.	2010b	Non saline	Funneliformis mosseae	Funneliformis	Citrus tangerine	Rutaceae	Woody	Perennial	Tree	Dicots	Long	C3	Non-legumes	3	3	0.31	0.0375173	0.25	0.0375173
102	359	Wu et al.	2013	Non saline	Funneliformis mosseae	Funneliformis	Poncirus trifoliata	Rutaceae	Woody	Perennial	Tree	Dicots	Long	C3	Non-legumes	4	4	1	0.16	0.7	0.36
102	360	Wu et al.	2010b	Non saline	Paraglomus occultum	Paraglomus	Citrus tangerine	Rutaceae	Woody	Perennial	Tree	Dicots	Long	C3	Non-legumes	3	3	0.32	0.0437702	0.25	0.0437702
102	361	Wu et al.	2010b	Moderate	Funneliformis mosseae	Funneliformis	Citrus tangerine	Rutaceae	Woody	Perennial	Tree	Dicots	Long	C3	Non-legumes	3	3	0.26	0.0437702	0.19	0.0437702
102	362	Wu et al.	2013	Moderate	Funneliformis mosseae	Funneliformis	Poncirus trifoliata	Rutaceae	Woody	Perennial	Tree	Dicots	Long	C3	Non-legumes	4	4	1.11	0.2	0.54	0.14
102	363	Wu et al.	2010b	Moderate	Paraglomus occultum	Paraglomus	Citrus tangerine	Rutaceae	Woody	Perennial	Tree	Dicots	Long	C3	Non-legumes	3	3	0.26	0.0437702	0.19	0.0437702
103	364	Wu et al.	2015	Non saline	Rhizophagus irregularis	Rhizophagus	Populus cathayana	Salicaceae	Woody	Perennial	Tree	Dicots	Moderate	C3	Non-legumes	15	15	13.4884	2.40185	12.5581	1.20093
103	365	Wu et al.	2015	Non saline	Rhizophagus irregularis	Rhizophagus	Populus cathayana	Salicaceae	Woody	Perennial	Tree	Dicots	Moderate	C3	Non-legumes	15	15	13.7984	3.00231	12.093	3.00231
103	366	Wu et al.	2015	Low	Rhizophagus irregularis	Rhizophagus	Populus cathayana	Salicaceae	Woody	Perennial	Tree	Dicots	Moderate	C3	Non-legumes	15	15	8.99225	2.40185	6.51163	3.00231
103	367	Wu et al.	2015	Low	Rhizophagus irregularis	Rhizophagus	Populus cathayana	Salicaceae	Woody	Perennial	Tree	Dicots	Moderate	C3	Non-legumes	15	15	5.5814	1.80139	5.89147	1.20093

## Sheet: RDB
PaperNo.	Study SL	Author	Year	Salinity_level	Mycorrhiza_Species	Mycorrhiza_Genera	Plant_Species	Plant_Family	Plant_Life_Styles	Plant_Lifecycle	Plant_Life_Forms	Plant_Clade	Salinity_duration	Nodulation	C3_C4	Ne	Nc	Me	Se	Mc	Sc
1	1	Abbaspour et al.	2006	Non saline	Claroideoglomus etunicatum	Claroideoglomus	Pistacia vera	Anacardiaceae	Woody	Perennial	Tree	Dicots	Moderate	Non-legumes	C3	4	4	0.4	0.0899092	0.29	0.0899092
1	2	Abbaspour et al.	2006	Low	Claroideoglomus etunicatum	Claroideoglomus	Pistacia vera	Anacardiaceae	Woody	Perennial	Tree	Dicots	Moderate	Non-legumes	C3	4	4	0.38	0.0899092	0.27	0.0899092
1	3	Abbaspour et al.	2006	Moderate	Claroideoglomus etunicatum	Claroideoglomus	Pistacia vera	Anacardiaceae	Woody	Perennial	Tree	Dicots	Moderate	Non-legumes	C3	4	4	0.25	0.0778122	0.18	0.0778122
1	4	Abbaspour et al.	2006	Moderate	Claroideoglomus etunicatum	Claroideoglomus	Pistacia vera	Anacardiaceae	Woody	Perennial	Tree	Dicots	Moderate	Non-legumes	C3	4	4	0.19	0.043229	0.16	0.043229
2	5	Abbaspour	2010	Non saline	Claroideoglomus etunicatum	Claroideoglomus	Carthamus tinctorius	Asteraceae	Herbaceous	Annual	Forb	Dicots	Moderate	Non-legumes	C3	4	4	0.42	0.106256	0.29	0.106256
2	6	Abbaspour	2010	Low	Claroideoglomus etunicatum	Claroideoglomus	Carthamus tinctorius	Asteraceae	Herbaceous	Annual	Forb	Dicots	Moderate	Non-legumes	C3	4	4	0.39	0.0980828	0.27	0.0980828
2	7	Abbaspour	2010	Moderate	Claroideoglomus etunicatum	Claroideoglomus	Carthamus tinctorius	Asteraceae	Herbaceous	Annual	Forb	Dicots	Moderate	Non-legumes	C3	4	4	0.24	0.0605206	0.17	0.0605206
2	8	Abbaspour	2010	High	Claroideoglomus etunicatum	Claroideoglomus	Carthamus tinctorius	Asteraceae	Herbaceous	Annual	Forb	Dicots	Moderate	Non-legumes	C3	4	4	0.19	0.0259374	0.16	0.0259374
4	9	Al-Karaki	2000	Non saline	Funneliformis mosseae	Funneliformis	Solanum lycopersicum	Solanaceae	Herbaceous	Annual	Forb	Dicots	Moderate	Non-legumes	C3	4	4	0.28	0.112406	0.2	0.0160579
4	10	Al-Karaki	2000	Low	Funneliformis mosseae	Funneliformis	Solanum lycopersicum	Solanaceae	Herbaceous	Annual	Forb	Dicots	Moderate	Non-legumes	C3	4	4	0.18	0.0160579	0.1	0.0160579
4	11	Al-Karaki	2000	Low	Funneliformis mosseae	Funneliformis	Solanum lycopersicum	Solanaceae	Herbaceous	Annual	Forb	Dicots	Moderate	Non-legumes	C3	4	4	0.09	0.0160579	0.08	0.0240869
5	12	Al-Karaki	2001	Non saline	Funneliformis mosseae	Funneliformis	Triticum aestivum	Poaceae	Herbaceous	Annual	Grass	Monocots	Moderate	Non-legumes	C3	4	4	0.89	0.602173	0.47	0.0401448
5	13	Al-Karaki	2001	Low	Funneliformis mosseae	Funneliformis	Triticum aestivum	Poaceae	Herbaceous	Annual	Grass	Monocots	Moderate	Non-legumes	C3	4	4	0.44	0.0901448	0.33	0.0401448
5	14	Al-Karaki	2001	Low	Funneliformis mosseae	Funneliformis	Triticum aestivum	Poaceae	Herbaceous	Annual	Grass	Monocots	Moderate	Non-legumes	C3	4	4	0.3	0.0401448	0.1	0.0401448
5	15	Al-Karaki	2001	Non saline	Funneliformis mosseae	Funneliformis	Triticum aestivum	Poaceae	Herbaceous	Annual	Grass	Monocots	Moderate	Non-legumes	C3	4	4	0.9	0.602173	0.44	0.0401448
5	16	Al-Karaki	2001	Low	Funneliformis mosseae	Funneliformis	Triticum aestivum	Poaceae	Herbaceous	Annual	Grass	Monocots	Moderate	Non-legumes	C3	4	4	0.36	0.0401448	0.32	0.0401448
5	17	Al-Karaki	2001	Low	Funneliformis mosseae	Funneliformis	Triticum aestivum	Poaceae	Herbaceous	Annual	Grass	Monocots	Moderate	Non-legumes	C3	4	4	0.15	0.0401448	0.07	0.0401448
9	18	Asghari	2008	Non saline	Rhizophagus intraradices	Rhizophagus	Trifolium subterraneum	Fabaceae	Herbaceous	Annual	Forb	Dicots	Short	Legumes	C3	3	3	412.94	150.559	114.35	21.5084
9	19	Asghari	2008	Low	Rhizophagus intraradices	Rhizophagus	Trifolium subterraneum	Fabaceae	Herbaceous	Annual	Forb	Dicots	Short	Legumes	C3	3	3	455.29	322.625	114.36	21.5084
9	20	Asghari	2008	Low	Rhizophagus intraradices	Rhizophagus	Trifolium subterraneum	Fabaceae	Herbaceous	Annual	Forb	Dicots	Short	Legumes	C3	3	3	374.82	150.559	180.47	21.5084
9	21	Asghari	2008	Low	Rhizophagus intraradices	Rhizophagus	Trifolium subterraneum	Fabaceae	Herbaceous	Annual	Forb	Dicots	Short	Legumes	C3	3	3	271.06	21.5084	165.65	21.5084
9	22	Asghari	2008	Moderate	Rhizophagus intraradices	Rhizophagus	Trifolium subterraneum	Fabaceae	Herbaceous	Annual	Forb	Dicots	Short	Legumes	C3	3	3	194.84	41.5084	140.25	31.5084
10	23	Asrar et al.	2014	Non saline	Septoglomus deserticola	Septoglomus	Kalanchoe blossfeldiana	Crassulaceae	Herbaceous	Perennial	Forb	Dicots	Moderate	Non-legumes	C3	10	10	0.55	0.064723	0.477	0.064723
10	24	Asrar et al.	2014	Low	Septoglomus deserticola	Septoglomus	Kalanchoe blossfeldiana	Crassulaceae	Herbaceous	Perennial	Forb	Dicots	Moderate	Non-legumes	C3	10	10	0.46	0.0709007	0.463	0.0709007
10	25	Asrar et al.	2014	Moderate	Septoglomus deserticola	Septoglomus	Kalanchoe blossfeldiana	Crassulaceae	Herbaceous	Perennial	Forb	Dicots	Moderate	Non-legumes	C3	10	10	0.403	0.120415	0.323	0.120415
10	26	Asrar et al.	2014	Moderate	Septoglomus deserticola	Septoglomus	Kalanchoe blossfeldiana	Crassulaceae	Herbaceous	Perennial	Forb	Dicots	Moderate	Non-legumes	C3	10	10	0.32	0.0677496	0.277	0.0677496
12	27	Bach Allen	1983	Non saline	Rhizophagus fasciculatus	Rhizophagus	Distichlis spicata	Poaceae	Herbaceous	Annual	Grass	Monocots	Not Provided	Non-legumes	C4	10	10	0.338	0.0358631	0.447	0.0358631
12	28	Bach Allen	1983	Low	Rhizophagus fasciculatus	Rhizophagus	Distichlis spicata	Poaceae	Herbaceous	Annual	Grass	Monocots	Not Provided	Non-legumes	C4	10	10	0.451	0.0358631	0.539	0.251042
12	29	Bach Allen	1983	Low	Rhizophagus fasciculatus	Rhizophagus	Distichlis spicata	Poaceae	Herbaceous	Annual	Grass	Monocots	Not Provided	Non-legumes	C4	10	10	0.366	0.0358631	0.411	0.0358631
12	30	Bach Allen	1983	Non saline	Rhizophagus fasciculatus	Rhizophagus	Distichlis spicata	Poaceae	Herbaceous	Annual	Grass	Monocots	Not Provided	Non-legumes	C4	10	10	0.406	0.0358631	0.525	0.251042
12	31	Bach Allen	1983	Low	Rhizophagus fasciculatus	Rhizophagus	Distichlis spicata	Poaceae	Herbaceous	Annual	Grass	Monocots	Not Provided	Non-legumes	C4	10	10	0.501	0.251042	0.753	0.537947
12	32	Bach Allen	1983	Low	Rhizophagus fasciculatus	Rhizophagus	Distichlis spicata	Poaceae	Herbaceous	Annual	Grass	Monocots	Not Provided	Non-legumes	C4	10	10	0.402	0.0358631	0.484	0.251042
13	33	Beltrano et al.	2013	Non saline	Rhizophagus intraradices	Rhizophagus	Capsicum annuum	Solanaceae	Herbaceous	Annual/Perennial	Forb/Shrub	Dicots	Moderate	Non-legumes	C3	3	3	0.065	0.0294449	0.087	0.0519615
13	34	Beltrano et al.	2013	Low	Rhizophagus intraradices	Rhizophagus	Capsicum annuum	Solanaceae	Herbaceous	Annual/Perennial	Forb/Shrub	Dicots	Moderate	Non-legumes	C3	3	3	0.335	0.0640859	0.195	0.0415692
13	35	Beltrano et al.	2013	Moderate	Rhizophagus intraradices	Rhizophagus	Capsicum annuum	Solanaceae	Herbaceous	Annual/Perennial	Forb/Shrub	Dicots	Moderate	Non-legumes	C3	3	3	0.271	0.145492	0.079	0.0138564
13	36	Beltrano et al.	2013	Moderate	Rhizophagus intraradices	Rhizophagus	Capsicum annuum	Solanaceae	Herbaceous	Annual/Perennial	Forb/Shrub	Dicots	Moderate	Non-legumes	C3	3	3	0.189	0.0944486	0.052	0.0138564
19	37	Campanelli et al.	2013	Non saline	Septoglomus viscosum	Septoglomus	Medicago sativa	Fabaceae	Herbaceous	Perennial	Forb	Dicots	Moderate	Legumes	C3	10	10	7.7	5.41867	4.1	1.6256
19	38	Campanelli et al.	2013	Moderate	Septoglomus viscosum	Septoglomus	Medicago sativa	Fabaceae	Herbaceous	Perennial	Forb	Dicots	Moderate	Legumes	C3	10	10	7.1	3.76296	3.6	3.76296
19	39	Campanelli et al.	2013	Moderate	Septoglomus viscosum	Septoglomus	Medicago sativa	Fabaceae	Herbaceous	Perennial	Forb	Dicots	Moderate	Legumes	C3	10	10	6.1	5.26815	2.6	1.58044
20	40	Carretero et al.	2008	Non saline	Rhizophagus intraradices	Rhizophagus	Manihot esculenta	Euphorbiaceae	Woody	Annual/Perennial	Shrub	Dicots	Moderate	Non-legumes	C3	3	3	85	21.8343	50	21.8343
20	41	Carretero et al.	2008	Low	Rhizophagus intraradices	Rhizophagus	Manihot esculenta	Euphorbiaceae	Woody	Annual/Perennial	Shrub	Dicots	Moderate	Non-legumes	C3	3	3	43	9.98967	42	9.98967
20	42	Carretero et al.	2008	Moderate	Rhizophagus intraradices	Rhizophagus	Manihot esculenta	Euphorbiaceae	Woody	Annual/Perennial	Shrub	Dicots	Moderate	Non-legumes	C3	3	3	72	29.969	69	29.969
20	43	Carretero et al.	2008	Non saline	Rhizophagus intraradices	Rhizophagus	Manihot esculenta	Euphorbiaceae	Woody	Annual/Perennial	Shrub	Dicots	Moderate	Non-legumes	C3	3	3	37	18.6474	33	2.66391
20	44	Carretero et al.	2008	Low	Rhizophagus intraradices	Rhizophagus	Manihot esculenta	Euphorbiaceae	Woody	Annual/Perennial	Shrub	Dicots	Moderate	Non-legumes	C3	3	3	41	29.969	44	29.969
20	45	Carretero et al.	2008	Moderate	Rhizophagus intraradices	Rhizophagus	Manihot esculenta	Euphorbiaceae	Woody	Annual/Perennial	Shrub	Dicots	Moderate	Non-legumes	C3	3	3	46	15.5959	21	15.5959
20	46	Carretero et al.	2008	Non saline	Rhizophagus intraradices	Rhizophagus	Manihot esculenta	Euphorbiaceae	Woody	Annual/Perennial	Shrub	Dicots	Moderate	Non-legumes	C3	3	3	29	9.98967	14	9.98967
20	47	Carretero et al.	2008	Low	Rhizophagus intraradices	Rhizophagus	Manihot esculenta	Euphorbiaceae	Woody	Annual/Perennial	Shrub	Dicots	Moderate	Non-legumes	C3	3	3	34	13.9855	36	13.9855
20	48	Carretero et al.	2008	Moderate	Rhizophagus intraradices	Rhizophagus	Manihot esculenta	Euphorbiaceae	Woody	Annual/Perennial	Shrub	Dicots	Moderate	Non-legumes	C3	3	3	29	20.0007	29	12.0007
21	49	Chang et al.	2018	Non saline	Rhizophagus intraradices	Rhizophagus	Elaeagnus angustifolia	Elaeagnaceae	Woody	Perennial	Shrub/Tree	Dicots	Short	Non-legumes	C3	3	3	0.62	0.225167	0.34	0.173205
21	50	Chang et al.	2018	High	Rhizophagus intraradices	Rhizophagus	Elaeagnus angustifolia	Elaeagnaceae	Woody	Perennial	Shrub/Tree	Dicots	Short	Non-legumes	C3	3	3	0.38	0.0519615	0.28	0.069282
22	51	Chen et al.	2017	Non saline	Rhizophagus irregularis	Rhizophagus	Robinia pseudoacacia	Fabaceae	Woody	Perennial	Tree	Dicots	Short	Legumes	C3	30	30	0.734	0.668222	0.449	0.179105
22	52	Chen et al.	2017	Moderate	Rhizophagus irregularis	Rhizophagus	Robinia pseudoacacia	Fabaceae	Woody	Perennial	Tree	Dicots	Short	Legumes	C3	30	30	0.617	0.202657	0.356	0.16103
22	53	Chen et al.	2017	Moderate	Rhizophagus irregularis	Rhizophagus	Robinia pseudoacacia	Fabaceae	Woody	Perennial	Tree	Dicots	Short	Legumes	C3	30	30	0.436	0.152417	0.237	0.13474
24	54	Diouf et al.	2005	Non saline	Rhizophagus intraradices	Rhizophagus	Acacia auriculiformis	Fabaceae	Woody	Perennial	Tree	Dicots	Long	Legumes	C3	9	9	0.79	0.45	0.77	0.45
24	55	Diouf et al.	2005	Low	Rhizophagus intraradices	Rhizophagus	Acacia auriculiformis	Fabaceae	Woody	Perennial	Tree	Dicots	Long	Legumes	C3	9	9	0.65	0.21	0.46	0.21
24	56	Diouf et al.	2005	Moderate	Rhizophagus intraradices	Rhizophagus	Acacia auriculiformis	Fabaceae	Woody	Perennial	Tree	Dicots	Long	Legumes	C3	9	9	0.46	0.177	0.34	0.177
24	57	Diouf et al.	2005	Non saline	Rhizophagus intraradices	Rhizophagus	Acacia mangium	Fabaceae	Woody	Perennial	Tree	Dicots	Long	Legumes	C3	9	9	2.22	1.884	0.89	0.5652
24	58	Diouf et al.	2005	Low	Rhizophagus intraradices	Rhizophagus	Acacia mangium	Fabaceae	Woody	Perennial	Tree	Dicots	Long	Legumes	C3	9	9	1.33	1.1886	0.49	0.35658
24	59	Diouf et al.	2005	Moderate	Rhizophagus intraradices	Rhizophagus	Acacia mangium	Fabaceae	Woody	Perennial	Tree	Dicots	Long	Legumes	C3	9	9	0.89	0.693427	0.41	0.208028
26	60	Duke et al.	1986	Non saline	Rhizophagus intraradices	Rhizophagus	Carrizo citrange	Rutaceae	Woody	Perennial	Shrub/Tree	Dicots	Moderate	Non-legumes	C3	5	5	0.032	0.0201246	0.03	0.0167082
26	61	Duke et al.	1986	Low	Rhizophagus intraradices	Rhizophagus	Carrizo citrange	Rutaceae	Woody	Perennial	Shrub/Tree	Dicots	Moderate	Non-legumes	C3	5	5	1.22	0.33541	0.42	0.0894427
26	62	Duke et al.	1986	Low	Rhizophagus intraradices	Rhizophagus	Carrizo citrange	Rutaceae	Woody	Perennial	Shrub/Tree	Dicots	Moderate	Non-legumes	C3	5	5	0.89	0.245967	0.206	0.134164
26	63	Duke et al.	1986	Moderate	Rhizophagus intraradices	Rhizophagus	Carrizo citrange	Rutaceae	Woody	Perennial	Shrub/Tree	Dicots	Moderate	Non-legumes	C3	5	5	0.68	0.290689	0.51	0.067082
27	64	Echeverria et al.	2008	Non saline	Rhizophagus intraradices	Rhizophagus	Lotus glaber	Fabaceae	Herbaceous	Annual	Forb	Dicots	Short	Legumes	C3	4	4	0.025	0.008	0.023	0.008
27	65	Echeverria et al.	2008	Moderate	Rhizophagus intraradices	Rhizophagus	Lotus glaber	Fabaceae	Herbaceous	Annual	Forb	Dicots	Short	Legumes	C3	4	4	0.019	0.004	0.008	0.002
27	66	Echeverria et al.	2008	Non saline	Rhizophagus intraradices	Rhizophagus	Lotus glaber	Fabaceae	Herbaceous	Annual	Forb	Dicots	Short	Legumes	C3	4	4	0.012	0.002	0.008	0.002
27	67	Echeverria et al.	2008	Moderate	Rhizophagus intraradices	Rhizophagus	Lotus glaber	Fabaceae	Herbaceous	Annual	Forb	Dicots	Short	Legumes	C3	4	4	0.015	0.004	0.005	0.002
28	68	Echeverria et al.	2013	Non saline	Rhizophagus intraradices	Rhizophagus	Lotus tenuis	Fabaceae	Herbaceous	Annual	Forb	Dicots	Short	Legumes	C3	4	4	67.69	24.12	68.36	13.06
28	69	Echeverria et al.	2013	Moderate	Rhizophagus intraradices	Rhizophagus	Lotus tenuis	Fabaceae	Herbaceous	Annual	Forb	Dicots	Short	Legumes	C3	4	4	30.99	13.28	41.94	16.32
29	70	Elhindi et al.	2017	Non saline	Septoglomus deserticola	Septoglomus	Ocimum basilicum	Lamiaceae	Herbaceous	Annual/Perennial	Forb	Dicots	Moderate	Non-legumes	C3	4	4	2.54	0.2	1.47	0.3
29	71	Elhindi et al.	2017	Low	Septoglomus deserticola	Septoglomus	Ocimum basilicum	Lamiaceae	Herbaceous	Annual/Perennial	Forb	Dicots	Moderate	Non-legumes	C3	4	4	1.83	0.84	1.33	0.6
29	72	Elhindi et al.	2017	Moderate	Septoglomus deserticola	Septoglomus	Ocimum basilicum	Lamiaceae	Herbaceous	Annual/Perennial	Forb	Dicots	Moderate	Non-legumes	C3	4	4	1.07	0.14	1	0.08
30	73	Estrada et al.	2013a	Non saline	Rhizophagus intraradices	Rhizophagus	Zea mays	Poaceae	Herbaceous	Annual	Grass	Monocots	Short	Non-legumes	C4	10	10	1.777	0.20871	2.02	0.230846
30	74	Estrada et al.	2013a	Low	Rhizophagus intraradices	Rhizophagus	Zea mays	Poaceae	Herbaceous	Annual	Grass	Monocots	Short	Non-legumes	C4	10	10	1.556	0.351013	1.607	0.183412
30	75	Estrada et al.	2013a	Moderate	Rhizophagus intraradices	Rhizophagus	Zea mays	Poaceae	Herbaceous	Annual	Grass	Monocots	Short	Non-legumes	C4	10	10	1.755	0.256144	1.667	0.486991
30	76	Estrada et al.	2013a	Non saline	Rhizophagus intraradices	Rhizophagus	Zea mays	Poaceae	Herbaceous	Annual	Grass	Monocots	Short	Non-legumes	C4	10	10	1.858	0.442719	2.02	0.230846
30	77	Estrada et al.	2013a	Low	Rhizophagus intraradices	Rhizophagus	Zea mays	Poaceae	Herbaceous	Annual	Grass	Monocots	Short	Non-legumes	C4	10	10	1.755	0.20871	1.607	0.183412
30	78	Estrada et al.	2013a	Moderate	Rhizophagus intraradices	Rhizophagus	Zea mays	Poaceae	Herbaceous	Annual	Grass	Monocots	Short	Non-legumes	C4	10	10	2.094	0.464855	1.667	0.486991
31	79	Estrada et al.	2013b	Non saline	Rhizophagus intraradices	Rhizophagus	Zea mays	Poaceae	Herbaceous	Annual	Grass	Monocots	Short	Non-legumes	C4	10	10	1.74	0.252982	2.02	0.221359
31	80	Estrada et al.	2013b	Low	Rhizophagus intraradices	Rhizophagus	Zea mays	Poaceae	Herbaceous	Annual	Grass	Monocots	Short	Non-legumes	C4	10	10	1.55	0.347851	1.61	0.189737
31	81	Estrada et al.	2013b	Moderate	Rhizophagus intraradices	Rhizophagus	Zea mays	Poaceae	Herbaceous	Annual	Grass	Monocots	Short	Non-legumes	C4	10	10	1.73	0.252982	1.66	0.442719
31	82	Estrada et al.	2013b	Non saline	Rhizophagus intraradices	Rhizophagus	Zea mays	Poaceae	Herbaceous	Annual	Grass	Monocots	Short	Non-legumes	C4	10	10	1.86	0.442719	2.02	0.221359
31	83	Estrada et al.	2013b	Low	Rhizophagus intraradices	Rhizophagus	Zea mays	Poaceae	Herbaceous	Annual	Grass	Monocots	Short	Non-legumes	C4	10	10	1.71	0.284605	1.61	0.189737
31	84	Estrada et al.	2013b	Moderate	Rhizophagus intraradices	Rhizophagus	Zea mays	Poaceae	Herbaceous	Annual	Grass	Monocots	Short	Non-legumes	C4	10	10	2.08	0.474342	1.66	0.442719
31	85	Estrada et al.	2013b	Non saline	Claroideoglomus etunicatum	Claroideoglomus	Zea mays	Poaceae	Herbaceous	Annual	Grass	Monocots	Short	Non-legumes	C4	10	10	1.46	0.632456	2.02	0.221359
31	86	Estrada et al.	2013b	Low	Claroideoglomus etunicatum	Claroideoglomus	Zea mays	Poaceae	Herbaceous	Annual	Grass	Monocots	Short	Non-legumes	C4	10	10	1.38	0.474342	1.61	0.189737
31	87	Estrada et al.	2013b	Moderate	Claroideoglomus etunicatum	Claroideoglomus	Zea mays	Poaceae	Herbaceous	Annual	Grass	Monocots	Short	Non-legumes	C4	10	10	1.48	0.252982	1.66	0.442719
31	88	Estrada et al.	2013b	Non saline	Septoglomus constrictum	Septoglomus	Zea mays	Poaceae	Herbaceous	Annual	Grass	Monocots	Short	Non-legumes	C4	10	10	2.81	0.664078	2.02	0.221359
31	89	Estrada et al.	2013b	Low	Septoglomus constrictum	Septoglomus	Zea mays	Poaceae	Herbaceous	Annual	Grass	Monocots	Short	Non-legumes	C4	10	10	2.01	0.442719	1.61	0.189737
31	90	Estrada et al.	2013b	Moderate	Septoglomus constrictum	Septoglomus	Zea mays	Poaceae	Herbaceous	Annual	Grass	Monocots	Short	Non-legumes	C4	10	10	2.08	0.537587	1.66	0.442719
33	91	Evelin and Kapoor	2014	Non saline	Rhizophagus intraradices	Rhizophagus	Trigonella foenum-graecum	Fabaceae	Herbaceous	Annual	Forb	Dicots	Short	Legumes	C3	3	3	0.1	0.0124768	0.08	0.0124768
33	92	Evelin and Kapoor	2014	Low	Rhizophagus intraradices	Rhizophagus	Trigonella foenum-graecum	Fabaceae	Herbaceous	Annual	Forb	Dicots	Short	Legumes	C3	3	3	0.09	0.0187151	0.06	0.0187151
33	93	Evelin and Kapoor	2014	Moderate	Rhizophagus intraradices	Rhizophagus	Trigonella foenum-graecum	Fabaceae	Herbaceous	Annual	Forb	Dicots	Short	Legumes	C3	3	3	0.06	0.00623838	0.05	0.00623838
33	94	Evelin and Kapoor	2014	Moderate	Rhizophagus intraradices	Rhizophagus	Trigonella foenum-graecum	Fabaceae	Herbaceous	Annual	Forb	Dicots	Short	Legumes	C3	3	3	0.05	0.0124768	0.03	0.0124768
34	95	Evelin et al.	2012	Non saline	Rhizophagus intraradices	Rhizophagus	Trigonella foenum-graecum	Fabaceae	Herbaceous	Annual	Forb	Dicots	Short	Legumes	C3	3	3	0.1	0.0173205	0.08	0.0173205
34	96	Evelin et al.	2012	Low	Rhizophagus intraradices	Rhizophagus	Trigonella foenum-graecum	Fabaceae	Herbaceous	Annual	Forb	Dicots	Short	Legumes	C3	3	3	0.09	0.069282	0.06	0.0173205
34	97	Evelin et al.	2012	Moderate	Rhizophagus intraradices	Rhizophagus	Trigonella foenum-graecum	Fabaceae	Herbaceous	Annual	Forb	Dicots	Short	Legumes	C3	3	3	0.06	0.00866025	0.05	0.009
34	98	Evelin et al.	2012	Moderate	Rhizophagus intraradices	Rhizophagus	Trigonella foenum-graecum	Fabaceae	Herbaceous	Annual	Forb	Dicots	Short	Legumes	C3	3	3	0.05	0.00866025	0.03	0.0173205
36	99	Garg and Baher	2013	Non saline	Funneliformis mosseae	Funneliformis	Cicer arietinum	Fabaceae	Herbaceous	Annual	Forb	Dicots	Long	Legumes	C3	6	6	5.63	2.12616	3.97	2.93939
36	100	Garg and Baher	2013	Moderate	Funneliformis mosseae	Funneliformis	Cicer arietinum	Fabaceae	Herbaceous	Annual	Forb	Dicots	Long	Legumes	C3	6	6	4.76	0.776488	3.2	0.563383
36	101	Garg and Baher	2013	Moderate	Funneliformis mosseae	Funneliformis	Cicer arietinum	Fabaceae	Herbaceous	Annual	Forb	Dicots	Long	Legumes	C3	6	6	3.79	0.734847	2.52	0.423762
36	102	Garg and Baher	2013	Moderate	Funneliformis mosseae	Funneliformis	Cicer arietinum	Fabaceae	Herbaceous	Annual	Forb	Dicots	Long	Legumes	C3	6	6	2.87	0.592777	1.78	0.649115
36	103	Garg and Baher	2013	Non saline	Funneliformis mosseae	Funneliformis	Cicer arietinum	Fabaceae	Herbaceous	Annual	Forb	Dicots	Long	Legumes	C3	6	6	5.567	0.678509	3.8	0.394368
36	104	Garg and Baher	2013	Moderate	Funneliformis mosseae	Funneliformis	Cicer arietinum	Fabaceae	Herbaceous	Annual	Forb	Dicots	Long	Legumes	C3	6	6	3.799	0.507044	2.41	0.323333
36	105	Garg and Baher	2013	Moderate	Funneliformis mosseae	Funneliformis	Cicer arietinum	Fabaceae	Herbaceous	Annual	Forb	Dicots	Long	Legumes	C3	6	6	2.343	0.592777	1.43	0.465403
36	106	Garg and Baher	2013	Moderate	Funneliformis mosseae	Funneliformis	Cicer arietinum	Fabaceae	Herbaceous	Annual	Forb	Dicots	Long	Legumes	C3	6	6	1.139	0.218005	0.66	0.163812
38	107	Garg and Bhandari	2016b	Non saline	Funneliformis mosseae	Funneliformis	Cicer arietinum	Fabaceae	Herbaceous	Annual	Forb	Dicots	Long	Legumes	C3	6	6	0.37	0.171464	0.27	0.0244949
38	108	Garg and Bhandari	2016b	Low	Funneliformis mosseae	Funneliformis	Cicer arietinum	Fabaceae	Herbaceous	Annual	Forb	Dicots	Long	Legumes	C3	6	6	0.27	0.0244949	0.2	0.0244949
38	109	Garg and Bhandari	2016b	Low	Funneliformis mosseae	Funneliformis	Cicer arietinum	Fabaceae	Herbaceous	Annual	Forb	Dicots	Long	Legumes	C3	6	6	0.22	0.0244949	0.15	0.0244949
38	110	Garg and Bhandari	2016b	Moderate	Funneliformis mosseae	Funneliformis	Cicer arietinum	Fabaceae	Herbaceous	Annual	Forb	Dicots	Long	Legumes	C3	6	6	0.12	0.0244949	0.08	0.0244949
38	111	Garg and Bhandari	2016b	Non saline	Funneliformis mosseae	Funneliformis	Cicer arietinum	Fabaceae	Herbaceous	Annual	Forb	Dicots	Long	Legumes	C3	6	6	0.29	0.0244949	0.24	0.0489898
38	112	Garg and Bhandari	2016b	Low	Funneliformis mosseae	Funneliformis	Cicer arietinum	Fabaceae	Herbaceous	Annual	Forb	Dicots	Long	Legumes	C3	6	6	0.2	0.0244949	0.15	0.06
38	113	Garg and Bhandari	2016b	Low	Funneliformis mosseae	Funneliformis	Cicer arietinum	Fabaceae	Herbaceous	Annual	Forb	Dicots	Long	Legumes	C3	6	6	0.15	0.0244949	0.1	0.0244949
38	114	Garg and Bhandari	2016b	Moderate	Funneliformis mosseae	Funneliformis	Cicer arietinum	Fabaceae	Herbaceous	Annual	Forb	Dicots	Long	Legumes	C3	6	6	0.06	0.0244949	0.04	0.01
39	115	Garg and Bharti	2018	Non saline	Rhizophagus intraradices	Rhizophagus	Cicer arietinum	Fabaceae	Herbaceous	Annual	Forb	Dicots	Moderate	Legumes	C3	6	6	1.74	0.685857	1.89	0.857321
39	116	Garg and Bharti	2018	Low	Rhizophagus intraradices	Rhizophagus	Cicer arietinum	Fabaceae	Herbaceous	Annual	Forb	Dicots	Moderate	Legumes	C3	6	6	1.62	1.10227	1.75	0.857321
39	117	Garg and Bharti	2018	Low	Rhizophagus intraradices	Rhizophagus	Cicer arietinum	Fabaceae	Herbaceous	Annual	Forb	Dicots	Moderate	Legumes	C3	6	6	1.36	0.514393	1.5	0.122474
39	118	Garg and Bharti	2018	Moderate	Rhizophagus intraradices	Rhizophagus	Cicer arietinum	Fabaceae	Herbaceous	Annual	Forb	Dicots	Moderate	Legumes	C3	6	6	1.08	0.122474	1.21	0.146969
39	119	Garg and Bharti	2018	Non saline	Rhizophagus intraradices	Rhizophagus	Cicer arietinum	Fabaceae	Herbaceous	Annual	Forb	Dicots	Moderate	Legumes	C3	6	6	1.52	1.10227	1.6	0.146969
39	120	Garg and Bharti	2018	Low	Rhizophagus intraradices	Rhizophagus	Cicer arietinum	Fabaceae	Herbaceous	Annual	Forb	Dicots	Moderate	Legumes	C3	6	6	1.29	0.367423	1.37	0.146969
39	121	Garg and Bharti	2018	Low	Rhizophagus intraradices	Rhizophagus	Cicer arietinum	Fabaceae	Herbaceous	Annual	Forb	Dicots	Moderate	Legumes	C3	6	6	0.96	0.0979796	1.05	0.514393
39	122	Garg and Bharti	2018	Moderate	Rhizophagus intraradices	Rhizophagus	Cicer arietinum	Fabaceae	Herbaceous	Annual	Forb	Dicots	Moderate	Legumes	C3	6	6	0.49	0.0979796	0.55	0.122474
40	123	Garg and Chandel	2011	Non saline	Funneliformis mosseae	Funneliformis	Cajanus cajan	Fabaceae	Woody	Annual/Perennial	Shrub	Dicots	Moderate	Legumes	C3	6	6	1.084	0.330681	0.865	0.298838
40	124	Garg and Chandel	2011	Low	Funneliformis mosseae	Funneliformis	Cajanus cajan	Fabaceae	Woody	Annual/Perennial	Shrub	Dicots	Moderate	Legumes	C3	6	6	0.937	0.323333	0.795	0.347828
40	125	Garg and Chandel	2011	Low	Funneliformis mosseae	Funneliformis	Cajanus cajan	Fabaceae	Woody	Annual/Perennial	Shrub	Dicots	Moderate	Legumes	C3	6	6	0.845	0.308636	0.758	0.281691
40	126	Garg and Chandel	2011	Non saline	Funneliformis mosseae	Funneliformis	Cajanus cajan	Fabaceae	Woody	Annual/Perennial	Shrub	Dicots	Moderate	Legumes	C3	6	6	0.424	0.276792	0.309	0.274343
40	127	Garg and Chandel	2011	Low	Funneliformis mosseae	Funneliformis	Cajanus cajan	Fabaceae	Woody	Annual/Perennial	Shrub	Dicots	Moderate	Legumes	C3	6	6	0.274	0.135273	0.232	0.200858
40	128	Garg and Chandel	2011	Low	Funneliformis mosseae	Funneliformis	Cajanus cajan	Fabaceae	Woody	Annual/Perennial	Shrub	Dicots	Moderate	Legumes	C3	6	6	0.229	0.0587878	0.196	0.0620946
41	129	Garg and Chandel	2012	Non saline	Funneliformis mosseae	Funneliformis	Cajanus cajan	Fabaceae	Woody	Annual/Perennial	Shrub	Dicots	Moderate	Legumes	C3	6	6	1.259	0.703004	0.865	0.315984
41	130	Garg and Chandel	2012	Low	Funneliformis mosseae	Funneliformis	Cajanus cajan	Fabaceae	Woody	Annual/Perennial	Shrub	Dicots	Moderate	Legumes	C3	6	6	0.962	0.100429	0.643	0.115126
41	131	Garg and Chandel	2012	Non saline	Funneliformis mosseae	Funneliformis	Cajanus cajan	Fabaceae	Woody	Annual/Perennial	Shrub	Dicots	Moderate	Legumes	C3	6	6	0.418	0.19106	0.309	0.154318
41	132	Garg and Chandel	2012	Low	Funneliformis mosseae	Funneliformis	Cajanus cajan	Fabaceae	Woody	Annual/Perennial	Shrub	Dicots	Moderate	Legumes	C3	6	6	0.185	0.107778	0.124	0.0465403
42	133	Garg and Manchanda	2009	Non saline	Funneliformis mosseae	Funneliformis	Cajanus cajan	Fabaceae	Woody	Annual/Perennial	Shrub	Dicots	Moderate	Legumes	C3	6	6	1.601	0.203331	1.425	0.203331
42	134	Garg and Manchanda	2009	Low	Funneliformis mosseae	Funneliformis	Cajanus cajan	Fabaceae	Woody	Annual/Perennial	Shrub	Dicots	Moderate	Legumes	C3	6	6	1.572	0.828345	0.855	0.828345
42	135	Garg and Manchanda	2009	Low	Funneliformis mosseae	Funneliformis	Cajanus cajan	Fabaceae	Woody	Annual/Perennial	Shrub	Dicots	Moderate	Legumes	C3	6	6	1.025	0.292289	0.772	0.292289
42	136	Garg and Manchanda	2009	Low	Funneliformis mosseae	Funneliformis	Cajanus cajan	Fabaceae	Woody	Annual/Perennial	Shrub	Dicots	Moderate	Legumes	C3	6	6	0.727	0.187157	0.565	0.187157
43	137	Garg and Pandey	2016	Non saline	Funneliformis mosseae	Funneliformis	Cajanus cajan	Fabaceae	Woody	Annual/Perennial	Shrub	Dicots	Moderate	Legumes	C3	6	6	2.82	1.83712	2.21	0.857321
43	138	Garg and Pandey	2016	Low	Funneliformis mosseae	Funneliformis	Cajanus cajan	Fabaceae	Woody	Annual/Perennial	Shrub	Dicots	Moderate	Legumes	C3	6	6	1.77	0.857321	1.25	0.146969
43	139	Garg and Pandey	2016	Moderate	Funneliformis mosseae	Funneliformis	Cajanus cajan	Fabaceae	Woody	Annual/Perennial	Shrub	Dicots	Moderate	Legumes	C3	6	6	0.7	0.195959	0.46	0.171464
43	140	Garg and Pandey	2016	Non saline	Rhizophagus irregularis	Rhizophagus	Cajanus cajan	Fabaceae	Woody	Annual/Perennial	Shrub	Dicots	Moderate	Legumes	C3	6	6	2.96	1.02879	2.21	0.857321
43	141	Garg and Pandey	2016	Low	Rhizophagus irregularis	Rhizophagus	Cajanus cajan	Fabaceae	Woody	Annual/Perennial	Shrub	Dicots	Moderate	Legumes	C3	6	6	2.14	1.02879	1.25	0.146969
43	142	Garg and Pandey	2016	Moderate	Rhizophagus irregularis	Rhizophagus	Cajanus cajan	Fabaceae	Woody	Annual/Perennial	Shrub	Dicots	Moderate	Legumes	C3	6	6	0.86	0.714643	0.46	0.171464
43	143	Garg and Pandey	2016	Non saline	Funneliformis mosseae	Funneliformis	Cajanus cajan	Fabaceae	Woody	Annual/Perennial	Shrub	Dicots	Moderate	Legumes	C3	6	6	3.02	0.9	2.29	1.02879
43	144	Garg and Pandey	2016	Low	Funneliformis mosseae	Funneliformis	Cajanus cajan	Fabaceae	Woody	Annual/Perennial	Shrub	Dicots	Moderate	Legumes	C3	6	6	2.46	1.02879	1.64	0.171464
43	145	Garg and Pandey	2016	Moderate	Funneliformis mosseae	Funneliformis	Cajanus cajan	Fabaceae	Woody	Annual/Perennial	Shrub	Dicots	Moderate	Legumes	C3	6	6	1.45	0.622045	0.85	0.469694
43	146	Garg and Pandey	2016	Non saline	Rhizophagus irregularis	Rhizophagus	Cajanus cajan	Fabaceae	Woody	Annual/Perennial	Shrub	Dicots	Moderate	Legumes	C3	6	6	3.19	1.20025	2.29	1.02879
43	147	Garg and Pandey	2016	Low	Rhizophagus irregularis	Rhizophagus	Cajanus cajan	Fabaceae	Woody	Annual/Perennial	Shrub	Dicots	Moderate	Legumes	C3	6	6	2.99	1.54318	1.64	0.171464
43	148	Garg and Pandey	2016	Moderate	Rhizophagus irregularis	Rhizophagus	Cajanus cajan	Fabaceae	Woody	Annual/Perennial	Shrub	Dicots	Moderate	Legumes	C3	6	6	1.79	0.714643	0.85	0.146969
44	149	Huang et al.	2013	Non saline	Claroideoglomus etunicatum	Claroideoglomus	Cucurbita pepo	Cucurbitaceae	Herbaceous	Annual	Forb	Dicots	Short	Non-legumes	C3	3	3	2.36	0.866025	2.36	0.69282
44	150	Huang et al.	2013	Low	Claroideoglomus etunicatum	Claroideoglomus	Cucurbita pepo	Cucurbitaceae	Herbaceous	Annual	Forb	Dicots	Short	Non-legumes	C3	3	3	3.14	0.69282	2.35	1.03923
44	151	Huang et al.	2013	Non saline	Funneliformis mosseae	Funneliformis	Cucurbita pepo	Cucurbitaceae	Herbaceous	Annual	Forb	Dicots	Short	Non-legumes	C3	3	3	2.66	0.866025	2.76	0.69282
44	152	Huang et al.	2013	Low	Funneliformis mosseae	Funneliformis	Cucurbita pepo	Cucurbitaceae	Herbaceous	Annual	Forb	Dicots	Short	Non-legumes	C3	3	3	2.74	0.69282	2.75	1.03923
44	153	Huang et al.	2013	Non saline	Claroideoglomus etunicatum	Claroideoglomus	Cucurbita pepo	Cucurbitaceae	Herbaceous	Annual	Forb	Dicots	Short	Non-legumes	C3	3	3	2.37	0.69282	2.36	0.69282
44	154	Huang et al.	2013	Low	Claroideoglomus etunicatum	Claroideoglomus	Cucurbita pepo	Cucurbitaceae	Herbaceous	Annual	Forb	Dicots	Short	Non-legumes	C3	3	3	3.14	0.519615	2.35	1.03923
44	155	Huang et al.	2013	Non saline	Funneliformis mosseae	Funneliformis	Cucurbita pepo	Cucurbitaceae	Herbaceous	Annual	Forb	Dicots	Short	Non-legumes	C3	3	3	3.37	0.69282	2.76	0.69282
44	156	Huang et al.	2013	Low	Funneliformis mosseae	Funneliformis	Cucurbita pepo	Cucurbitaceae	Herbaceous	Annual	Forb	Dicots	Short	Non-legumes	C3	3	3	3.44	0.519615	2.75	1.03923
45	157	Latef and Chaoxing	2014	Non saline	Funneliformis mosseae	Funneliformis	Capsicum annuum	Solanaceae	Herbaceous	Annual/Perennial	Forb/Shrub	Dicots	Long	Non-legumes	C3	6	6	0.73	0.131921	0.61	0.131921
45	158	Latef and Chaoxing	2014	Low	Funneliformis mosseae	Funneliformis	Capsicum annuum	Solanaceae	Herbaceous	Annual/Perennial	Forb/Shrub	Dicots	Long	Non-legumes	C3	6	6	0.71	0.329803	0.41	0.329803
45	159	Latef and Chaoxing	2014	Low	Funneliformis mosseae	Funneliformis	Capsicum annuum	Solanaceae	Herbaceous	Annual/Perennial	Forb/Shrub	Dicots	Long	Non-legumes	C3	6	6	0.53	0.219869	0.33	0.219869
45	160	Latef and Chaoxing	2014	Moderate	Funneliformis mosseae	Funneliformis	Capsicum annuum	Solanaceae	Herbaceous	Annual/Perennial	Forb/Shrub	Dicots	Long	Non-legumes	C3	6	6	0.38	0.186888	0.21	0.186888
47	161	Hajiboland et al.	2010	Non saline	Rhizophagus intraradices	Rhizophagus	Solanum lycopersicum	Solanaceae	Herbaceous	Annual	Forb	Dicots	Long	Non-legumes	C3	4	4	0.476	0.053	0.41	0.27
47	162	Hajiboland et al.	2010	Low	Rhizophagus intraradices	Rhizophagus	Solanum lycopersicum	Solanaceae	Herbaceous	Annual	Forb	Dicots	Long	Non-legumes	C3	4	4	0.312	0.025	0.252	0.09
47	163	Hajiboland et al.	2010	Moderate	Rhizophagus intraradices	Rhizophagus	Solanum lycopersicum	Solanaceae	Herbaceous	Annual	Forb	Dicots	Long	Non-legumes	C3	4	4	1.364	0.811	0.9636	0.435
47	164	Hajiboland et al.	2010	Non saline	Rhizophagus intraradices	Rhizophagus	Solanum lycopersicum	Solanaceae	Herbaceous	Annual	Forb	Dicots	Long	Non-legumes	C3	4	4	0.284	0.135	0.192	0.135
47	165	Hajiboland et al.	2010	Low	Rhizophagus intraradices	Rhizophagus	Solanum lycopersicum	Solanaceae	Herbaceous	Annual	Forb	Dicots	Long	Non-legumes	C3	4	4	0.344	0.18	0.246	0.028
47	166	Hajiboland et al.	2010	Moderate	Rhizophagus intraradices	Rhizophagus	Solanum lycopersicum	Solanaceae	Herbaceous	Annual	Forb	Dicots	Long	Non-legumes	C3	4	4	0.126	0.08	0.063	0.025
48	167	He and Huang	2013	Non saline	Funneliformis mosseae	Funneliformis	Solanum lycopersicum	Solanaceae	Herbaceous	Annual	Forb	Dicots	Long	Non-legumes	C3	6	6	0.95	0.342929	0.74	0.122474
48	168	He and Huang	2013	Low	Funneliformis mosseae	Funneliformis	Solanum lycopersicum	Solanaceae	Herbaceous	Annual	Forb	Dicots	Long	Non-legumes	C3	6	6	0.62	0.173485	0.45	0.0898979
48	169	He and Huang	2013	Low	Funneliformis mosseae	Funneliformis	Solanum lycopersicum	Solanaceae	Herbaceous	Annual	Forb	Dicots	Long	Non-legumes	C3	6	6	0.29	0.124495	0.18	0.0544949
49	170	He et al.	2007	Non saline	Funneliformis mosseae	Funneliformis	Solanum lycopersicum	Solanaceae	Herbaceous	Annual	Forb	Dicots	Long	Non-legumes	C3	6	6	1.37	0.296388	1.1	0.296388
49	171	He et al.	2007	Low	Funneliformis mosseae	Funneliformis	Solanum lycopersicum	Solanaceae	Herbaceous	Annual	Forb	Dicots	Long	Non-legumes	C3	6	6	0.86	0.208207	0.67	0.208207
49	172	He et al.	2007	Low	Funneliformis mosseae	Funneliformis	Solanum lycopersicum	Solanaceae	Herbaceous	Annual	Forb	Dicots	Long	Non-legumes	C3	6	6	0.42	0.151868	0.28	0.151868
50	173	He et al.	2010	Non saline	Funneliformis mosseae	Funneliformis	Solanum lycopersicum	Solanaceae	Herbaceous	Annual	Forb	Dicots	Long	Non-legumes	C3	6	6	1.37	0.296388	1.1	0.296388
50	174	He et al.	2010	Low	Funneliformis mosseae	Funneliformis	Solanum lycopersicum	Solanaceae	Herbaceous	Annual	Forb	Dicots	Long	Non-legumes	C3	6	6	0.86	0.208207	0.67	0.208207
50	175	He et al.	2010	Low	Funneliformis mosseae	Funneliformis	Solanum lycopersicum	Solanaceae	Herbaceous	Annual	Forb	Dicots	Long	Non-legumes	C3	6	6	0.42	0.151868	0.28	0.151868
52	176	Huang et al.	2010	Non saline	Funneliformis mosseae	Funneliformis	Solanum lycopersicum	Solanaceae	Herbaceous	Annual	Forb	Dicots	Long	Non-legumes	C3	10	10	3.873	1.05	1.39	0.49
52	177	Huang et al.	2010	Low	Funneliformis mosseae	Funneliformis	Solanum lycopersicum	Solanaceae	Herbaceous	Annual	Forb	Dicots	Long	Non-legumes	C3	10	10	0.862	0.088	1.866	0.861
52	178	Huang et al.	2010	Moderate	Funneliformis mosseae	Funneliformis	Solanum lycopersicum	Solanaceae	Herbaceous	Annual	Forb	Dicots	Long	Non-legumes	C3	10	10	0.651	0.123	0.5316	0.107
56	179	Peng et al.	2011	Non saline	Funneliformis mosseae	Funneliformis	Astragalus sinicus	Fabaceae	Herbaceous	Annual/Perennial	Forb/Shrub	Dicots	Long	Legumes	C3	3	3	0.223	0.05	0.112	0.0484974
56	180	Peng et al.	2011	Non saline	Rhizoglomus clarum	Rhizoglomus	Astragalus sinicus	Fabaceae	Herbaceous	Annual/Perennial	Forb/Shrub	Dicots	Long	Legumes	C3	3	3	0.238	0.109119	0.112	0.0484974
56	181	Peng et al.	2011	Non saline	Rhizophagus intraradices	Rhizophagus	Astragalus sinicus	Fabaceae	Herbaceous	Annual/Perennial	Forb/Shrub	Dicots	Long	Legumes	C3	3	3	0.311	0.0433013	0.112	0.0484974
56	182	Peng et al.	2011	Low	Funneliformis mosseae	Funneliformis	Astragalus sinicus	Fabaceae	Herbaceous	Annual/Perennial	Forb/Shrub	Dicots	Long	Legumes	C3	3	3	0.161	0.103923	0.08	0.0103923
56	183	Peng et al.	2011	Low	Rhizoglomus clarum	Rhizoglomus	Astragalus sinicus	Fabaceae	Herbaceous	Annual/Perennial	Forb/Shrub	Dicots	Long	Legumes	C3	3	3	0.208	0.0848705	0.08	0.0103923
56	184	Peng et al.	2011	Low	Rhizophagus intraradices	Rhizophagus	Astragalus sinicus	Fabaceae	Herbaceous	Annual/Perennial	Forb/Shrub	Dicots	Long	Legumes	C3	3	3	0.272	0.103923	0.18	0.0910392
56	185	Peng et al.	2011	Low	Funneliformis mosseae	Funneliformis	Astragalus sinicus	Fabaceae	Herbaceous	Annual/Perennial	Forb/Shrub	Dicots	Long	Legumes	C3	3	3	0.114	0.0155885	0.031	0.0103923
56	186	Peng et al.	2011	Low	Rhizoglomus clarum	Rhizoglomus	Astragalus sinicus	Fabaceae	Herbaceous	Annual/Perennial	Forb/Shrub	Dicots	Long	Legumes	C3	3	3	0.127	0.0484974	0.031	0.0103923
56	187	Peng et al.	2011	Low	Rhizophagus intraradices	Rhizophagus	Astragalus sinicus	Fabaceae	Herbaceous	Annual/Perennial	Forb/Shrub	Dicots	Long	Legumes	C3	3	3	0.24	0.155885	0.193	0.0810392
56	188	Peng et al.	2011	Low	Funneliformis mosseae	Funneliformis	Astragalus sinicus	Fabaceae	Herbaceous	Annual/Perennial	Forb/Shrub	Dicots	Long	Legumes	C3	3	3	0.079	0.0121244	0.016	0.0121244
56	189	Peng et al.	2011	Low	Rhizoglomus clarum	Rhizoglomus	Astragalus sinicus	Fabaceae	Herbaceous	Annual/Perennial	Forb/Shrub	Dicots	Long	Legumes	C3	3	3	0.095	0.0121244	0.048	0.0121244
56	190	Peng et al.	2011	Low	Rhizophagus intraradices	Rhizophagus	Astragalus sinicus	Fabaceae	Herbaceous	Annual/Perennial	Forb/Shrub	Dicots	Long	Legumes	C3	3	3	0.206	0.103923	0.2016	0.0848705
59	191	Porras-Soriano et al.	2009	Non saline	Funneliformis mosseae	Funneliformis	Olea europaea	Oleaceae	Woody	Perennial	Tree	Dicots	Long	Non-legumes	C3	50	50	2.96	1.89131	0.75	0.367394
59	192	Porras-Soriano et al.	2009	Non saline	Rhizophagus irregularis	Rhizophagus	Olea europaea	Oleaceae	Woody	Perennial	Tree	Dicots	Long	Non-legumes	C3	50	50	2.05	2.63862	0.75	0.391586
59	193	Porras-Soriano et al.	2009	Non saline	Claroideoglomus claroideum	Claroideoglomus	Olea europaea	Oleaceae	Woody	Perennial	Tree	Dicots	Long	Non-legumes	C3	50	50	1.99	1.42649	0.75	0.327947
59	194	Porras-Soriano et al.	2009	High	Funneliformis mosseae	Funneliformis	Olea europaea	Oleaceae	Woody	Perennial	Tree	Dicots	Long	Non-legumes	C3	50	50	2.5	1.35391	1.32	1.20617
59	195	Porras-Soriano et al.	2009	High	Rhizophagus irregularis	Rhizophagus	Olea europaea	Oleaceae	Woody	Perennial	Tree	Dicots	Long	Non-legumes	C3	50	50	1.46	0.6416	0.44	1.01925
59	196	Porras-Soriano et al.	2009	High	Claroideoglomus claroideum	Claroideoglomus	Olea europaea	Oleaceae	Woody	Perennial	Tree	Dicots	Long	Non-legumes	C3	50	50	1.62	0.820729	0.44	0.262186
64	197	Wu & Zou	2009	Non saline	Funneliformis mosseae	Funneliformis	Citrus tangerine	Rutaceae	Woody	Perennial	Tree	Dicots	Long	Non-legumes	C3	3	3	0.18	0.0173205	0.15	0.0173205
64	198	Wu & Zou	2009	Non saline	Paraglomus occultum	Paraglomus	Citrus tangerine	Rutaceae	Woody	Perennial	Tree	Dicots	Long	Non-legumes	C3	3	3	0.19	0.0242487	0.15	0.0242487
64	199	Wu & Zou	2009	Moderate	Funneliformis mosseae	Funneliformis	Citrus tangerine	Rutaceae	Woody	Perennial	Tree	Dicots	Long	Non-legumes	C3	3	3	0.12	0.0173205	0.09	0.0173205
64	200	Wu & Zou	2009	Moderate	Paraglomus occultum	Paraglomus	Citrus tangerine	Rutaceae	Woody	Perennial	Tree	Dicots	Long	Non-legumes	C3	3	3	0.12	0.0173205	0.09	0.0173205
66	201	Yamato et al.	2008	Non saline	Rhizophagus intraradices	Rhizophagus	Sorghum bicolor	Poaceae	Herbaceous	Perennial	Grass	Monocots	Long	Non-legumes	C4	6	6	1.062	0.727765	0.4	0.21833
66	202	Yamato et al.	2008	Non saline	Rhizophagus intraradices	Rhizophagus	Sorghum bicolor	Poaceae	Herbaceous	Perennial	Grass	Monocots	Long	Non-legumes	C4	6	6	1.034	0.696984	0.4	0.209095
66	203	Yamato et al.	2008	Non saline	Rhizophagus intraradices	Rhizophagus	Sorghum bicolor	Poaceae	Herbaceous	Perennial	Grass	Monocots	Long	Non-legumes	C4	6	6	1.006	0.666202	0.4	0.199861
66	204	Yamato et al.	2008	Moderate	Rhizophagus intraradices	Rhizophagus	Sorghum bicolor	Poaceae	Herbaceous	Perennial	Grass	Monocots	Long	Non-legumes	C4	6	6	0.675	0.424347	0.289	0.127304
66	205	Yamato et al.	2008	Moderate	Rhizophagus intraradices	Rhizophagus	Sorghum bicolor	Poaceae	Herbaceous	Perennial	Grass	Monocots	Long	Non-legumes	C4	6	6	0.634	0.379273	0.289	0.113782
66	206	Yamato et al.	2008	Moderate	Rhizophagus intraradices	Rhizophagus	Sorghum bicolor	Poaceae	Herbaceous	Perennial	Grass	Monocots	Long	Non-legumes	C4	6	6	0.786	0.546374	0.289	0.163912
66	207	Yamato et al.	2008	Moderate	Rhizophagus intraradices	Rhizophagus	Sorghum bicolor	Poaceae	Herbaceous	Perennial	Grass	Monocots	Long	Non-legumes	C4	6	6	0.282	0.257246	0.144	0.0771739
66	208	Yamato et al.	2008	Moderate	Rhizophagus intraradices	Rhizophagus	Sorghum bicolor	Poaceae	Herbaceous	Perennial	Grass	Monocots	Long	Non-legumes	C4	6	6	0.344	0.325406	0.144	0.0976217
66	209	Yamato et al.	2008	Moderate	Rhizophagus intraradices	Rhizophagus	Sorghum bicolor	Poaceae	Herbaceous	Perennial	Grass	Monocots	Long	Non-legumes	C4	6	6	0.379	0.363883	0.144	0.109165
67	210	Younesi et al.	2013	Non saline	Funneliformis mosseae	Funneliformis	Glycine max	Fabaceae	Herbaceous	Annual	Forb	Dicots	Long	Legumes	C3	4	4	5.8	0.51	4.6	0.7
67	211	Younesi et al.	2013	Low	Funneliformis mosseae	Funneliformis	Glycine max	Fabaceae	Herbaceous	Annual	Forb	Dicots	Long	Legumes	C3	4	4	5.3	1.37	3.8	0.67
67	212	Younesi et al.	2013	Moderate	Funneliformis mosseae	Funneliformis	Glycine max	Fabaceae	Herbaceous	Annual	Forb	Dicots	Long	Legumes	C3	4	4	3.6	0.7	2.1	0.28
67	213	Zhang et al.	2014	Non saline	Funneliformis mosseae	Funneliformis	Kosteletzkya virginica	Malvaceae	Woody	Perennial	Shrub	Dicots	Long	Non-legumes	C3	3	3	0.066	0.0173205	0.046	0.0173205
67	214	Zhang et al.	2014	Moderate	Funneliformis mosseae	Funneliformis	Kosteletzkya virginica	Malvaceae	Woody	Perennial	Shrub	Dicots	Long	Non-legumes	C3	3	3	0.068	0.034641	0.036	0.0173205
68	215	ZhongQun et al.	2010	Non saline	Funneliformis mosseae	Funneliformis	Solanum lycopersicum	Solanaceae	Herbaceous	Annual	Forb	Dicots	Long	Non-legumes	C3	6	6	1.37	0.296823	1.1	0.296823
68	216	ZhongQun et al.	2010	High	Funneliformis mosseae	Funneliformis	Solanum lycopersicum	Solanaceae	Herbaceous	Annual	Forb	Dicots	Long	Non-legumes	C3	6	6	0.86	0.208875	0.67	0.208875
68	217	ZhongQun et al.	2010	High	Funneliformis mosseae	Funneliformis	Solanum lycopersicum	Solanaceae	Herbaceous	Annual	Forb	Dicots	Long	Non-legumes	C3	6	6	0.42	0.153908	0.28	0.153908
69	218	Zhu et al.	2016	Non saline	Rhizophagus irregularis	Rhizophagus	Triticum aestivum	Poaceae	Herbaceous	Annual	Forb	Monocots	Long	Non-legumes	C3	4	4	2.83	1.26	2.25	0.98
69	219	Zhu et al.	2016	Low	Rhizophagus irregularis	Rhizophagus	Triticum aestivum	Poaceae	Herbaceous	Annual	Forb	Monocots	Long	Non-legumes	C3	4	4	2.67	1.12	2.37	0.4
69	220	Zhu et al.	2016	Moderate	Rhizophagus irregularis	Rhizophagus	Triticum aestivum	Poaceae	Herbaceous	Annual	Forb	Monocots	Long	Non-legumes	C3	4	4	1.6	0.7	1.5	0.28
70	221	Zhu et al.	2018	Non saline	Rhizophagus irregularis	Rhizophagus	Triticum aestivum	Poaceae	Herbaceous	Annual	Forb	Monocots	Long	Non-legumes	C3	4	4	5.84	0.54	4.35	0.66
70	222	Zhu et al.	2018	Low	Rhizophagus irregularis	Rhizophagus	Triticum aestivum	Poaceae	Herbaceous	Annual	Forb	Monocots	Long	Non-legumes	C3	4	4	2.02	0.56	1.79	0.84
70	223	Zhu et al.	2018	Moderate	Rhizophagus irregularis	Rhizophagus	Triticum aestivum	Poaceae	Herbaceous	Annual	Forb	Monocots	Long	Non-legumes	C3	4	4	1.34	0.7	1.32	0.2
71	224	Zou and Wu	2011	Non saline	Funneliformis mosseae	Funneliformis	Poncirus trifoliata	Rutaceae	Woody	Perennial	Shrub	Dicots	Long	Non-legumes	C3	3	3	0.17	0.049907	0.09	0.049907
71	225	Zou and Wu	2011	Non saline	Diversispora versiformis	Diversispora	Poncirus trifoliata	Rutaceae	Woody	Perennial	Shrub	Dicots	Long	Non-legumes	C3	3	3	0.12	0.0187151	0.09	0.0187151
71	226	Zou and Wu	2011	Moderate	Funneliformis mosseae	Funneliformis	Poncirus trifoliata	Rutaceae	Woody	Perennial	Shrub	Dicots	Long	Non-legumes	C3	3	3	0.11	0.0249535	0.07	0.0249535
71	227	Zou and Wu	2011	Moderate	Diversispora versiformis	Diversispora	Poncirus trifoliata	Rutaceae	Woody	Perennial	Shrub	Dicots	Long	Non-legumes	C3	3	3	0.09	0.0124768	0.07	0.0124768
75	228	Kaya et al.	2009	Non saline	Rhizoglomus clarum	Rhizoglomus	Capsicum annuum	Solanaceae	Herbaceous	Annual/Perennial	Forb/Shrub	Dicots	Not Provided	Non-legumes	C3	3	3	6.9	1.99852	6.7	1.99852
75	229	Kaya et al.	2009	Low	Rhizoglomus clarum	Rhizoglomus	Capsicum annuum	Solanaceae	Herbaceous	Annual/Perennial	Forb/Shrub	Dicots	Not Provided	Non-legumes	C3	3	3	5.9	3.99704	5.5	3.99704
75	230	Kaya et al.	2009	Moderate	Rhizoglomus clarum	Rhizoglomus	Capsicum annuum	Solanaceae	Herbaceous	Annual/Perennial	Forb/Shrub	Dicots	Not Provided	Non-legumes	C3	3	3	3.8	0.333087	3.3	0.333087
78	231	Kohler et al.	2010	Non saline	Funneliformis mosseae	Funneliformis	Lactuca sativa	Asteraceae	Herbaceous	Annual	Forb	Dicots	Long	Non-legumes	C3	5	5	0.73	0.067082	0.82	0.31305
78	232	Kohler et al.	2010	Moderate	Funneliformis mosseae	Funneliformis	Lactuca sativa	Asteraceae	Herbaceous	Annual	Forb	Dicots	Long	Non-legumes	C3	5	5	0.78	0.067082	0.42	0.156525
78	233	Kohler et al.	2010	High	Funneliformis mosseae	Funneliformis	Lactuca sativa	Asteraceae	Herbaceous	Annual	Forb	Dicots	Long	Non-legumes	C3	5	5	0.45	0.0447214	0.26	0.0223607
79	234	Kohler et al.	2009	Non saline	Funneliformis mosseae	Funneliformis	Lactuca sativa	Asteraceae	Herbaceous	Annual	Forb	Dicots	Moderate	Non-legumes	C3	5	5	0.73	0.0923147	0.82	0.0923147
79	235	Kohler et al.	2009	Non saline	Rhizophagus irregularis	Rhizophagus	Lactuca sativa	Asteraceae	Herbaceous	Annual	Forb	Dicots	Moderate	Non-legumes	C3	5	5	0.64	0.184629	0.82	0.184629
79	236	Kohler et al.	2009	Moderate	Funneliformis mosseae	Funneliformis	Lactuca sativa	Asteraceae	Herbaceous	Annual	Forb	Dicots	Moderate	Non-legumes	C3	5	5	0.78	0.369259	0.42	0.369259
79	237	Kohler et al.	2009	Moderate	Rhizophagus irregularis	Rhizophagus	Lactuca sativa	Asteraceae	Herbaceous	Annual	Forb	Dicots	Moderate	Non-legumes	C3	5	5	0.7	0.287201	0.42	0.287201
79	238	Kohler et al.	2009	High	Funneliformis mosseae	Funneliformis	Lactuca sativa	Asteraceae	Herbaceous	Annual	Forb	Dicots	Moderate	Non-legumes	C3	5	5	0.45	0.194887	0.26	0.194887
79	239	Kohler et al.	2009	High	Rhizophagus irregularis	Rhizophagus	Lactuca sativa	Asteraceae	Herbaceous	Annual	Forb	Dicots	Moderate	Non-legumes	C3	5	5	0.41	0.153858	0.26	0.153858
80	240	Latefa and Chaoxingb	2011	Non saline	Funneliformis mosseae	Funneliformis	Solanum lycopersicum	Solanaceae	Herbaceous	Annual	Forb	Dicots	Long	Non-legumes	C3	6	6	3.88	2.74853	1.38	0.824559
80	241	Latefa and Chaoxingb	2011	Low	Funneliformis mosseae	Funneliformis	Solanum lycopersicum	Solanaceae	Herbaceous	Annual	Forb	Dicots	Long	Non-legumes	C3	6	6	1.86	1.09941	0.86	0.329824
80	242	Latefa and Chaoxingb	2011	Moderate	Funneliformis mosseae	Funneliformis	Solanum lycopersicum	Solanaceae	Herbaceous	Annual	Forb	Dicots	Long	Non-legumes	C3	6	6	0.66	0.3738	0.32	0.11214
92	243	Sheng et al.	2008	Non saline	Funneliformis mosseae	Funneliformis	Zea mays	Poaceae	Herbaceous	Annual	Grass	Monocots	Long	Non-legumes	C4	5	5	2.37	0.2	1.32	0.21
92	244	Sheng et al.	2008	Low	Funneliformis mosseae	Funneliformis	Zea mays	Poaceae	Herbaceous	Annual	Grass	Monocots	Long	Non-legumes	C4	5	5	2.26	0.49	1.2	0.6
92	245	Sheng et al.	2008	Low	Funneliformis mosseae	Funneliformis	Zea mays	Poaceae	Herbaceous	Annual	Grass	Monocots	Long	Non-legumes	C4	5	5	1.65	0.17	1.09	0.19
92	246	Sheng et al.	2008	Moderate	Funneliformis mosseae	Funneliformis	Zea mays	Poaceae	Herbaceous	Annual	Grass	Monocots	Long	Non-legumes	C4	5	5	1.24	1.01	0.87	0.3
92	247	Sheng et al.	2008	Moderate	Funneliformis mosseae	Funneliformis	Zea mays	Poaceae	Herbaceous	Annual	Grass	Monocots	Long	Non-legumes	C4	5	5	0.94	0.35	0.6	0.3
94	248	Shokri and Maadi	2009	Low	Rhizophagus irregularis	Rhizophagus	Trifolium alexandrium	Fabaceae	Herbaceous	Annual	Forb	Dicots	Long	Legumes	C3	3	3	0.64	0.300139	0.16	0.09
94	249	Shokri and Maadi	2009	Low	Rhizophagus irregularis	Rhizophagus	Trifolium alexandrium	Fabaceae	Herbaceous	Annual	Forb	Dicots	Long	Legumes	C3	3	3	0.6	0.312645	0.3	0.089
94	250	Shokri and Maadi	2009	Moderate	Rhizophagus irregularis	Rhizophagus	Trifolium alexandrium	Fabaceae	Herbaceous	Annual	Forb	Dicots	Long	Legumes	C3	3	3	0.46	0.250116	0.18	0.098
95	251	Tian et al.	2004	Non saline	Funneliformis mosseae	Funneliformis	Gossypium arboreum	Malvaceae	Woody	Perennial	Tree	Dicots	Long	Non-legumes	C3	3	3	1.56	0.259808	1.65	0.311769
95	252	Tian et al.	2004	Non saline	Funneliformis mosseae	Funneliformis	Gossypium arboreum	Malvaceae	Woody	Perennial	Tree	Dicots	Long	Non-legumes	C3	3	3	1.52	0.606218	1.65	0.311769
95	253	Tian et al.	2004	Low	Funneliformis mosseae	Funneliformis	Gossypium arboreum	Malvaceae	Woody	Perennial	Tree	Dicots	Long	Non-legumes	C3	3	3	1.49	0.606218	1.46	0.32909
95	254	Tian et al.	2004	Low	Funneliformis mosseae	Funneliformis	Gossypium arboreum	Malvaceae	Woody	Perennial	Tree	Dicots	Long	Non-legumes	C3	3	3	1.33	0.173205	1.46	0.32909
95	255	Tian et al.	2004	Moderate	Funneliformis mosseae	Funneliformis	Gossypium arboreum	Malvaceae	Woody	Perennial	Tree	Dicots	Long	Non-legumes	C3	3	3	1.54	0.779423	1.21	0.588897
95	256	Tian et al.	2004	Moderate	Funneliformis mosseae	Funneliformis	Gossypium arboreum	Malvaceae	Woody	Perennial	Tree	Dicots	Long	Non-legumes	C3	3	3	1.07	0.519615	1.21	0.588897
95	257	Tian et al.	2004	Moderate	Funneliformis mosseae	Funneliformis	Gossypium arboreum	Malvaceae	Woody	Perennial	Tree	Dicots	Long	Non-legumes	C3	3	3	1.21	0.34641	0.99	0.259808
95	258	Tian et al.	2004	Moderate	Funneliformis mosseae	Funneliformis	Gossypium arboreum	Malvaceae	Woody	Perennial	Tree	Dicots	Long	Non-legumes	C3	3	3	0.77	0.103923	0.99	0.259808
97	259	Turkmen et al.	2007	Non saline	Rhizophagus irregularis	Rhizophagus	Capsicum annuum	Solanaceae	Herbaceous	Annual/Perennial	Forb/Shrub	Dicots	Long	Non-legumes	C3	4	4	0.073	0.00662276	0.053	0.00662276
97	260	Turkmen et al.	2007	Non saline	Gigaspora margarita	Gigaspora	Capsicum annuum	Solanaceae	Herbaceous	Annual/Perennial	Forb/Shrub	Dicots	Long	Non-legumes	C3	4	4	0.068	0.00662276	0.053	0.00662276
97	261	Turkmen et al.	2007	Low	Rhizophagus irregularis	Rhizophagus	Capsicum annuum	Solanaceae	Herbaceous	Annual/Perennial	Forb/Shrub	Dicots	Long	Non-legumes	C3	4	4	0.053	0.00662276	0.04	0.00662276
97	262	Turkmen et al.	2007	Low	Gigaspora margarita	Gigaspora	Capsicum annuum	Solanaceae	Herbaceous	Annual/Perennial	Forb/Shrub	Dicots	Long	Non-legumes	C3	4	4	0.06	0.00662276	0.04	0.00662276
98	263	Wang et al.	2018	Non saline	Funneliformis mosseae	Funneliformis	Chrysanthemum morifolium	Asteraceae	Herbaceous	Perennial	Forb	Dicots	Long	Non-legumes	C3	5	5	0.760826	0.39706	0.680392	0.34776
98	264	Wang et al.	2018	Non saline	Diversispora versiformis	Diversispora	Chrysanthemum morifolium	Asteraceae	Herbaceous	Perennial	Forb	Dicots	Long	Non-legumes	C3	5	5	1.01906	0.364388	0.680392	0.34776
98	265	Wang et al.	2018	Low	Funneliformis mosseae	Funneliformis	Chrysanthemum morifolium	Asteraceae	Herbaceous	Perennial	Forb	Dicots	Long	Non-legumes	C3	5	5	1.87406	0.82822	1.36415	0.496179
98	266	Wang et al.	2018	Low	Diversispora versiformis	Diversispora	Chrysanthemum morifolium	Asteraceae	Herbaceous	Perennial	Forb	Dicots	Long	Non-legumes	C3	5	5	1.48784	0.397709	1.36415	0.496179
98	267	Wang et al.	2018	Moderate	Funneliformis mosseae	Funneliformis	Chrysanthemum morifolium	Asteraceae	Herbaceous	Perennial	Forb	Dicots	Long	Non-legumes	C3	5	5	0.350435	0.297811	0.429251	0.248447
98	268	Wang et al.	2018	Moderate	Diversispora versiformis	Diversispora	Chrysanthemum morifolium	Asteraceae	Herbaceous	Perennial	Forb	Dicots	Long	Non-legumes	C3	5	5	0.467877	0.143077	0.729251	0.248447
99	269	Wang et al.	2019	Non saline	Funneliformis mosseae	Funneliformis	Zelkova serrata	Ulmaceae	Woody	Perennial	Tree	Dicots	Long	Non-legumes	C3	24	24	10.6	5.77775	9.9	9.30806
99	270	Wang et al.	2019	Non saline	Funneliformis mosseae	Funneliformis	Zelkova serrata	Ulmaceae	Woody	Perennial	Tree	Dicots	Long	Non-legumes	C3	24	24	10.3	7.63633	9.9	9.30806
99	271	Wang et al.	2019	Non saline	Diversispora versiformis	Diversispora	Zelkova serrata	Ulmaceae	Woody	Perennial	Tree	Dicots	Long	Non-legumes	C3	24	24	11.3	10.7778	9.9	9.30806
99	272	Wang et al.	2019	Moderate	Funneliformis mosseae	Funneliformis	Zelkova serrata	Ulmaceae	Woody	Perennial	Tree	Dicots	Long	Non-legumes	C3	24	24	8.7	2.9798	7.1	4.40908
99	273	Wang et al.	2019	Moderate	Funneliformis mosseae	Funneliformis	Zelkova serrata	Ulmaceae	Woody	Perennial	Tree	Dicots	Long	Non-legumes	C3	24	24	8.2	2.44949	7.1	4.40908
99	274	Wang et al.	2019	Moderate	Diversispora versiformis	Diversispora	Zelkova serrata	Ulmaceae	Woody	Perennial	Tree	Dicots	Long	Non-legumes	C3	24	24	7.1	4.89898	7.1	4.40908
100	275	Wu and Zou	2009	Non saline	Funneliformis mosseae	Funneliformis	Citrus tangerine	Rutaceae	Woody	Perennial	Tree	Dicots	Long	Non-legumes	C3	3	3	0.18	0.0187587	0.15	0.0187587
100	276	Wu and Zou	2009	Non saline	Paraglomus occultum	Paraglomus	Citrus tangerine	Rutaceae	Woody	Perennial	Tree	Dicots	Long	Non-legumes	C3	3	3	0.19	0.0250116	0.15	0.0250116
100	277	Wu and Zou	2009	Moderate	Funneliformis mosseae	Funneliformis	Citrus tangerine	Rutaceae	Woody	Perennial	Tree	Dicots	Long	Non-legumes	C3	3	3	0.12	0.0187587	0.09	0.0187587
100	278	Wu and Zou	2009	Moderate	Paraglomus occultum	Paraglomus	Citrus tangerine	Rutaceae	Woody	Perennial	Tree	Dicots	Long	Non-legumes	C3	3	3	0.12	0.0187587	0.09	0.0187587
102	279	Wu et al.	2010b	Non saline	Funneliformis mosseae	Funneliformis	Citrus tangerine	Rutaceae	Woody	Perennial	Tree	Dicots	Long	Non-legumes	C3	3	3	0.18	0.0187587	0.15	0.0187587
102	280	Wu et al.	2010b	Non saline	Paraglomus occultum	Paraglomus	Citrus tangerine	Rutaceae	Woody	Perennial	Tree	Dicots	Long	Non-legumes	C3	3	3	0.19	0.0250116	0.15	0.0250116
102	281	Wu et al.	2010b	Moderate	Funneliformis mosseae	Funneliformis	Citrus tangerine	Rutaceae	Woody	Perennial	Tree	Dicots	Long	Non-legumes	C3	3	3	0.12	0.0187587	0.09	0.0187587
102	282	Wu et al.	2010b	Moderate	Paraglomus occultum	Paraglomus	Citrus tangerine	Rutaceae	Woody	Perennial	Tree	Dicots	Long	Non-legumes	C3	3	3	0.12	0.0187587	0.09	0.0187587
102	283	Wu et al.	2013	Non saline	Funneliformis mosseae	Funneliformis	Poncirus trifoliata	Rutaceae	Woody	Perennial	Tree	Dicots	Long	Non-legumes	C3	4	4	0.71	0.1	0.65	0.28
102	284	Wu et al.	2013	Moderate	Funneliformis mosseae	Funneliformis	Poncirus trifoliata	Rutaceae	Woody	Perennial	Tree	Dicots	Long	Non-legumes	C3	4	4	0.57	0.06	0.43	0.06
103	285	Wu et al.	2015	Non saline	Rhizophagus irregularis	Rhizophagus	Populus cathayana	Salicaceae	Woody	Perennial	Tree	Dicots	Moderate	Non-legumes	C3	15	15	5	2.42061	4.84375	1.81546
103	286	Wu et al.	2015	Low	Rhizophagus irregularis	Rhizophagus	Populus cathayana	Salicaceae	Woody	Perennial	Tree	Dicots	Moderate	Non-legumes	C3	15	15	3.28125	1.81546	2.8125	1.81546
103	287	Wu et al.	2015	Non saline	Rhizophagus irregularis	Rhizophagus	Populus cathayana	Salicaceae	Woody	Perennial	Tree	Dicots	Moderate	Non-legumes	C3	15	15	3.4375	3.02577	4.6875	1.21031
103	288	Wu et al.	2015	Low	Rhizophagus irregularis	Rhizophagus	Populus cathayana	Salicaceae	Woody	Perennial	Tree	Dicots	Moderate	Non-legumes	C3	15	15	2.8125	1.81546	3.28125	1.81546

## Sheet: PH
PaperNo.	Study SL	Author	Year	Salinity_level	Mycorrhiza_Species	Mycorrhiza_Genera	Plant_Species	Plant_Family	Plant_Life_Styles	Plant_Lifecycle	Plant_Life_Forms	Plant_Clade	Salinity_duration	Ne	Nc	Me	Se	Mc	Sc
2	1	Abbaspour	2010	Non saline	Claroideoglomus etunicatum	Claroideoglomus	Carthamus tinctorius	Asteraceae	Herbaceous	Annual	Forb	Dicots	Moderate	4	4	28.92	3.80888	24.26	3.80888
2	2	Abbaspour	2010	Low	Claroideoglomus etunicatum	Claroideoglomus	Carthamus tinctorius	Asteraceae	Herbaceous	Annual	Forb	Dicots	Moderate	4	4	26.34	6.02392	18.97	6.02392
2	3	Abbaspour	2010	Moderate	Claroideoglomus etunicatum	Claroideoglomus	Carthamus tinctorius	Asteraceae	Herbaceous	Annual	Forb	Dicots	Moderate	4	4	28.5	5.78689	21.42	5.78689
2	4	Abbaspour	2010	High	Claroideoglomus etunicatum	Claroideoglomus	Carthamus tinctorius	Asteraceae	Herbaceous	Annual	Forb	Dicots	Moderate	4	4	24.63	4.5445	19.07	4.5445
3	5	Abdel-Fattah et al.	2013	Non saline	Funneliformis mosseae	Funneliformis	Triticum aestivum	Poaceae	Herbaceous	Annual	Grass	Monocots	Long	10	10	77.33	12.5382	69	12.5382
3	6	Abdel-Fattah et al.	2013	Low	Funneliformis mosseae	Funneliformis	Triticum aestivum	Poaceae	Herbaceous	Annual	Grass	Monocots	Long	10	10	28.67	19.8522	27.83	18.5287
3	7	Abdel-Fattah et al.	2013	Moderate	Funneliformis mosseae	Funneliformis	Triticum aestivum	Poaceae	Herbaceous	Annual	Grass	Monocots	Long	10	10	23.5	18.9069	22	16.5435
10	8	Asrar et al.	2014	Non saline	Septoglomus deserticola	Septoglomus	Kalanchoe blossfeldiana	Crassulaceae	Herbaceous	Perennial	Forb	Dicots	Moderate	10	10	23.7	9.9839	17.067	9.9839
10	9	Asrar et al.	2014	Low	Septoglomus deserticola	Septoglomus	Kalanchoe blossfeldiana	Crassulaceae	Herbaceous	Perennial	Forb	Dicots	Moderate	10	10	25.933	8.62923	20.2	8.62923
10	10	Asrar et al.	2014	Moderate	Septoglomus deserticola	Septoglomus	Kalanchoe blossfeldiana	Crassulaceae	Herbaceous	Perennial	Forb	Dicots	Moderate	10	10	28.767	18.4909	27.3	16.1795
10	11	Asrar et al.	2014	Moderate	Septoglomus deserticola	Septoglomus	Kalanchoe blossfeldiana	Crassulaceae	Herbaceous	Perennial	Forb	Dicots	Moderate	10	10	24.933	5.71971	21.133	5.71971
17	12	Borde et al.	2011	Non saline	Rhizophagus fasciculatus	Rhizophagus	Pennisetum glaucum	Poaceae	Herbaceous	Annual	Grass	Monocots	Moderate	3	3	95.82	60.2754	78.33	16.4891
17	13	Borde et al.	2011	Moderate	Rhizophagus fasciculatus	Rhizophagus	Pennisetum glaucum	Poaceae	Herbaceous	Annual	Grass	Monocots	Moderate	3	3	91.06	82.3071	68.5	56.257
17	14	Borde et al.	2011	Moderate	Rhizophagus fasciculatus	Rhizophagus	Pennisetum glaucum	Poaceae	Herbaceous	Annual	Grass	Monocots	Moderate	3	3	93.13	13.8218	66.09	10.6868
17	15	Borde et al.	2011	High	Rhizophagus fasciculatus	Rhizophagus	Pennisetum glaucum	Poaceae	Herbaceous	Annual	Grass	Monocots	Moderate	3	3	59.99	16.5584	44	9.89001
19	16	Campanelli et al.	2013	Non saline	Septoglomus viscosum	Septoglomus	Medicago sativa	Fabaceae	Herbaceous	Perennial	Forb	Dicots	Moderate	10	10	56.4	19.1159	43.7	19.1159
19	17	Campanelli et al.	2013	Moderate	Septoglomus viscosum	Septoglomus	Medicago sativa	Fabaceae	Herbaceous	Perennial	Forb	Dicots	Moderate	10	10	53.4	15.8044	42.9	15.8044
19	18	Campanelli et al.	2013	Moderate	Septoglomus viscosum	Septoglomus	Medicago sativa	Fabaceae	Herbaceous	Perennial	Forb	Dicots	Moderate	10	10	48.6	26.9428	30.7	26.9428
34	19	Evelin et al.	2012	Non saline	Rhizophagus intraradices	Rhizophagus	Trigonella foenum-graecum	Fabaceae	Herbaceous	Annual	Forb	Dicots	Short	3	3	24	7.93279	19.33	2.63272
34	20	Evelin et al.	2012	Low	Rhizophagus intraradices	Rhizophagus	Trigonella foenum-graecum	Fabaceae	Herbaceous	Annual	Forb	Dicots	Short	3	3	23	8.66025	18.83	9.25088
34	21	Evelin et al.	2012	Moderate	Rhizophagus intraradices	Rhizophagus	Trigonella foenum-graecum	Fabaceae	Herbaceous	Annual	Forb	Dicots	Short	3	3	17.65	2.63272	16	12.1244
34	22	Evelin et al.	2012	Moderate	Rhizophagus intraradices	Rhizophagus	Trigonella foenum-graecum	Fabaceae	Herbaceous	Annual	Forb	Dicots	Short	3	3	16.66	15.9349	14.83	2.16506
49	23	He et al.	2007	Non saline	Funneliformis mosseae	Funneliformis	Solanum lycopersicum	Solanaceae	Herbaceous	Annual	Forb	Dicots	Long	6	6	4.8	1.05328	3.84	1.05328
49	24	He et al.	2007	Low	Funneliformis mosseae	Funneliformis	Solanum lycopersicum	Solanaceae	Herbaceous	Annual	Forb	Dicots	Long	6	6	2.38	0.306186	2.1	0.306186
49	25	He et al.	2007	Low	Funneliformis mosseae	Funneliformis	Solanum lycopersicum	Solanaceae	Herbaceous	Annual	Forb	Dicots	Long	6	6	2.2	0.438459	1.8	0.438459
50	26	He et al.	2010	Non saline	Funneliformis mosseae	Funneliformis	Solanum lycopersicum	Solanaceae	Herbaceous	Annual	Forb	Dicots	Long	6	6	4.8	1.05328	3.84	1.05328
50	27	He et al.	2010	Low	Funneliformis mosseae	Funneliformis	Solanum lycopersicum	Solanaceae	Herbaceous	Annual	Forb	Dicots	Long	6	6	2.38	0.306186	2.1	0.306186
50	28	He et al.	2010	Low	Funneliformis mosseae	Funneliformis	Solanum lycopersicum	Solanaceae	Herbaceous	Annual	Forb	Dicots	Long	6	6	2.2	0.438459	1.8	0.438459
61	29	Rabie et al.	2005	Non saline	Rhizoglomus clarum	Rhizoglomus	Vigna sinensis	Fabaceae	Herbaceous	Annual	Forb	Dicots	Long	5	5	96	30.6935	66	28.6473
61	30	Rabie et al.	2005	Low	Rhizoglomus clarum	Rhizoglomus	Vigna sinensis	Fabaceae	Herbaceous	Annual	Forb	Dicots	Long	5	5	99	56.519	59	26.3756
61	31	Rabie et al.	2005	Low	Rhizoglomus clarum	Rhizoglomus	Vigna sinensis	Fabaceae	Herbaceous	Annual	Forb	Dicots	Long	5	5	76	26.8981	54	25.1049
61	32	Rabie et al.	2005	Low	Rhizoglomus clarum	Rhizoglomus	Vigna sinensis	Fabaceae	Herbaceous	Annual	Forb	Dicots	Long	5	5	65	16.3369	39	15.2478
61	33	Rabie et al.	2005	Low	Rhizoglomus clarum	Rhizoglomus	Vigna sinensis	Fabaceae	Herbaceous	Annual	Forb	Dicots	Long	5	5	57	14.0679	21	13.13
62	34	Rabie	2005	Non saline	Rhizoglomus clarum	Rhizoglomus	Vigna radiata	Fabaceae	Herbaceous	Annual	Forb	Dicots	Long	4	4	51.3	24.1094	40.1	22.5021
62	35	Rabie	2005	High	Rhizoglomus clarum	Rhizoglomus	Vigna radiata	Fabaceae	Herbaceous	Annual	Forb	Dicots	Long	4	4	50.5	24.1094	25.3	22.5021
62	36	Rabie	2005	High	Rhizoglomus clarum	Rhizoglomus	Vigna radiata	Fabaceae	Herbaceous	Annual	Forb	Dicots	Long	4	4	38.6	24.1094	24.5	11.251
62	37	Rabie	2005	High	Rhizoglomus clarum	Rhizoglomus	Vigna radiata	Fabaceae	Herbaceous	Annual	Forb	Dicots	Long	4	4	27.3	12.8583	21.8	11.251
63	38	Rinaldelli & Mancuso	2017	Non saline	Funneliformis mosseae	Funneliformis	Olea europaea	Oleaceae	Woody	Perennial	Shrub/Tree	Dicots	Long	5	5	84.705	33.84	54.352	32.116
63	39	Rinaldelli & Mancuso	2017	Low	Funneliformis mosseae	Funneliformis	Olea europaea	Oleaceae	Woody	Perennial	Shrub/Tree	Dicots	Long	5	5	78.352	31.056	45.882	6.352
63	40	Rinaldelli & Mancuso	2017	Low	Funneliformis mosseae	Funneliformis	Olea europaea	Oleaceae	Woody	Perennial	Shrub/Tree	Dicots	Long	5	5	76.941	47.64	42.352	22.232
63	41	Rinaldelli & Mancuso	2017	Low	Funneliformis mosseae	Funneliformis	Olea europaea	Oleaceae	Woody	Perennial	Shrub/Tree	Dicots	Long	5	5	74.117	47.64	40.235	34.587
63	42	Rinaldelli & Mancuso	2017	Moderate	Funneliformis mosseae	Funneliformis	Olea europaea	Oleaceae	Woody	Perennial	Shrub/Tree	Dicots	Long	5	5	70.235	47.64	36.352	19.761
67	43	Younesi et al.	2013	Non saline	Funneliformis mosseae	Funneliformis	Glycine max	Fabaceae	Herbaceous	Annual	Forb	Dicots	Long	4	4	98.4	42.15	89.4	42.98
67	44	Younesi et al.	2013	Low	Funneliformis mosseae	Funneliformis	Glycine max	Fabaceae	Herbaceous	Annual	Forb	Dicots	Long	4	4	94.1	21.15	75.5	32.2
67	45	Younesi et al.	2013	Moderate	Funneliformis mosseae	Funneliformis	Glycine max	Fabaceae	Herbaceous	Annual	Forb	Dicots	Long	4	4	76.8	31.35	63.2	39.06
68	46	ZhongQun et al.	2010	Non saline	Funneliformis mosseae	Funneliformis	Solanum lycopersicum	Solanaceae	Herbaceous	Annual	Forb	Dicots	Long	6	6	4.8	1.05537	3.84	1.05537
68	47	ZhongQun et al.	2010	High	Funneliformis mosseae	Funneliformis	Solanum lycopersicum	Solanaceae	Herbaceous	Annual	Forb	Dicots	Long	6	6	2.38	0.307816	2.1	0.307816
68	48	ZhongQun et al.	2010	High	Funneliformis mosseae	Funneliformis	Solanum lycopersicum	Solanaceae	Herbaceous	Annual	Forb	Dicots	Long	6	6	2.2	0.439737	1.8	0.439737
72	49	Zou et al.	2013	Non saline	Diversispora versiformis	Diversispora	Poncirus trifoliata	Rutaceae	Woody	Perennial	Shrub	Dicots	Long	3	3	14.4	5.6	12	9.8
72	50	Zou et al.	2013	Moderate	Diversispora versiformis	Diversispora	Poncirus trifoliata	Rutaceae	Woody	Perennial	Shrub	Dicots	Long	3	3	13.2	4.5	11.2	6.3
72	51	Zou et al.	2013	Moderate	Diversispora versiformis	Diversispora	Poncirus trifoliata	Rutaceae	Woody	Perennial	Shrub	Dicots	Long	3	3	10.6	8.8	9	2.8
72	52	Zou et al.	2013	High	Diversispora versiformis	Diversispora	Poncirus trifoliata	Rutaceae	Woody	Perennial	Shrub	Dicots	Long	3	3	8.7	8.18	7.5	1
73	53	Zuccarini & Okurowska	2008	Non saline	Rhizophagus intraradices	Rhizophagus	Ocimum basilicum	Lamiaceae	Herbaceous	Annual/Perennial	Forb	Dicots	Long	3	3	40.715	6.17823	33.342	4.94154
73	54	Zuccarini & Okurowska	2008	Moderate	Rhizophagus intraradices	Rhizophagus	Ocimum basilicum	Lamiaceae	Herbaceous	Annual/Perennial	Forb	Dicots	Long	3	3	38.038	11.2912	25.283	8.34502
77	55	Khalloufi et al.	2017	Non saline	Rhizophagus irregularis	Rhizophagus	Solanum lycopersicum	Solanaceae	Herbaceous	Annual	Forb	Dicots	Moderate	6	6	58	21.3106	55.67	22.9762
77	56	Khalloufi et al.	2017	Moderate	Rhizophagus irregularis	Rhizophagus	Solanum lycopersicum	Solanaceae	Herbaceous	Annual	Forb	Dicots	Moderate	6	6	45.5	10.6553	41.67	11.3166
88	57	Selvakumar and Thamizhiniyan	2011	Non saline	Rhizophagus irregularis	Rhizophagus	Capsicum annuum	Solanaceae	Herbaceous	Annual/Perennial	Forb/Shrub	Dicots	Long	5	5	73.5	33	65.32	27.44
88	58	Selvakumar and Thamizhiniyan	2011	Low	Rhizophagus irregularis	Rhizophagus	Capsicum annuum	Solanaceae	Herbaceous	Annual/Perennial	Forb/Shrub	Dicots	Long	5	5	66.03	29.7	63.12	26.46
88	59	Selvakumar and Thamizhiniyan	2011	Low	Rhizophagus irregularis	Rhizophagus	Capsicum annuum	Solanaceae	Herbaceous	Annual/Perennial	Forb/Shrub	Dicots	Long	5	5	54.71	24.6	43.89	18.06
89	60	Shabbir et al.	2010	Non saline	Rhizophagus irregularis	Rhizophagus	Phoenix dactylifera	Arecaceae	Woody	Perennial	Tree	Monocots	Long	6	6	34.8795	14.5566	21.6867	14.5566
89	61	Shabbir et al.	2010	Low	Rhizophagus irregularis	Rhizophagus	Phoenix dactylifera	Arecaceae	Woody	Perennial	Tree	Monocots	Long	6	6	33.7952	14.3572	20.7831	14.3572
89	62	Shabbir et al.	2010	Moderate	Rhizophagus irregularis	Rhizophagus	Phoenix dactylifera	Arecaceae	Woody	Perennial	Tree	Monocots	Long	6	6	26.3855	8.57441	18.6145	8.57441
94	63	Shokri and Maadi	2009	Low	Rhizophagus irregularis	Rhizophagus	Trifolium alexandrium	Fabaceae	Herbaceous	Annual	Forb	Dicots	Long	3	3	5385.67	3077.8	1463.47	1077.8
94	64	Shokri and Maadi	2009	Low	Rhizophagus irregularis	Rhizophagus	Trifolium alexandrium	Fabaceae	Herbaceous	Annual	Forb	Dicots	Long	3	3	4288.34	2556.75	1199.43	1156.75
94	65	Shokri and Maadi	2009	Moderate	Rhizophagus irregularis	Rhizophagus	Trifolium alexandrium	Fabaceae	Herbaceous	Annual	Forb	Dicots	Long	3	3	3161.55	1889.8	1139.26	189.805
97	66	Turkmen et al.	2007	Non saline	Rhizophagus irregularis	Rhizophagus	Capsicum annuum	Solanaceae	Herbaceous	Annual/Perennial	Forb/Shrub	Dicots	Long	4	4	26.53	9.62847	20.88	8.98657
97	67	Turkmen et al.	2007	Non saline	Gigaspora margarita	Gigaspora	Capsicum annuum	Solanaceae	Herbaceous	Annual/Perennial	Forb/Shrub	Dicots	Long	4	4	24.82	9.62847	20.88	8.98657
97	68	Turkmen et al.	2007	Low	Rhizophagus irregularis	Rhizophagus	Capsicum annuum	Solanaceae	Herbaceous	Annual/Perennial	Forb/Shrub	Dicots	Long	4	4	24.3	9.62847	16.98	8.98657
97	69	Turkmen et al.	2007	Low	Gigaspora margarita	Gigaspora	Capsicum annuum	Solanaceae	Herbaceous	Annual/Perennial	Forb/Shrub	Dicots	Long	4	4	23.65	9.62847	16.98	8.98657
101	70	Wu et al.	2010	Non saline	Diversispora versiformis	Diversispora	Poncirus trifoliata	Rutaceae	Woody	Perennial	Tree	Dicots	Long	4	4	18.6	2.45902	15.6	2.45902
101	71	Wu et al.	2010	Non saline	Funneliformis mosseae	Funneliformis	Poncirus trifoliata	Rutaceae	Woody	Perennial	Tree	Dicots	Long	4	4	23	6.06557	15.6	6.06557
101	72	Wu et al.	2010	Moderate	Diversispora versiformis	Diversispora	Poncirus trifoliata	Rutaceae	Woody	Perennial	Tree	Dicots	Long	4	4	16.9	2.70492	13.6	2.70492
101	73	Wu et al.	2010	Moderate	Funneliformis mosseae	Funneliformis	Poncirus trifoliata	Rutaceae	Woody	Perennial	Tree	Dicots	Long	4	4	22.1	6.96721	13.6	6.96721
102	74	Wu et al.	2010b	Non saline	Funneliformis mosseae	Funneliformis	Citrus tangerine	Rutaceae	Woody	Perennial	Tree	Dicots	Long	3	3	11.9	6.00278	10.7	5.25243
102	75	Wu et al.	2010b	Non saline	Paraglomus occultum	Paraglomus	Citrus tangerine	Rutaceae	Woody	Perennial	Tree	Dicots	Long	3	3	11.5	7.50347	10.7	7.00324
102	76	Wu et al.	2010b	Moderate	Funneliformis mosseae	Funneliformis	Citrus tangerine	Rutaceae	Woody	Perennial	Tree	Dicots	Long	3	3	10.4	5.6276	9.8	5.25243
102	77	Wu et al.	2010b	Moderate	Paraglomus occultum	Paraglomus	Citrus tangerine	Rutaceae	Woody	Perennial	Tree	Dicots	Long	3	3	10.7	4.50208	9.8	7.87864
102	78	Wu et al.	2013	Non saline	Funneliformis mosseae	Funneliformis	Poncirus trifoliata	Rutaceae	Woody	Perennial	Tree	Dicots	Long	4	4	18	2.6	13.4	2.2
102	79	Wu et al.	2013	Moderate	Funneliformis mosseae	Funneliformis	Poncirus trifoliata	Rutaceae	Woody	Perennial	Tree	Dicots	Long	4	4	17.5	2.4	11	2.2

## Sheet: Carotenoids
PaperNo.	Study SL	Author	Year	Salinity_level	Mycorrhiza_Species	Mycorrhiza_Genera	Plant_Species	Plant_Family	Plant_Life_Styles	Plant_Lifecycle	Plant_Life_Forms	Plant_Clade	Salinity_duration	Ne	Nc	Me	Mc	Se	Sc
3	1	Abdel-Fattah et al.	2013	Non saline	Funneliformis mosseae	Funneliformis	Triticum aestivum	Poaceae	Herbaceous	Annual	Grass	Monocots	Long	10	10	4.47	4.41	1.09453	1.09453
3	2	Abdel-Fattah et al.	2013	Low	Funneliformis mosseae	Funneliformis	Triticum aestivum	Poaceae	Herbaceous	Annual	Grass	Monocots	Long	10	10	3.07	2.62	0.677334	0.677334
3	3	Abdel-Fattah et al.	2013	Moderate	Funneliformis mosseae	Funneliformis	Triticum aestivum	Poaceae	Herbaceous	Annual	Grass	Monocots	Long	10	10	2.87	2.45	0.632178	0.632178
10	4	Asrar et al.	2014	Non saline	Septoglomus deserticola	Septoglomus	Kalanchoe blossfeldiana	Crassulaceae	Herbaceous	Perennial	Forb	Dicots	Moderate	10	10	336.02	206.27	195.298	195.298
10	5	Asrar et al.	2014	Low	Septoglomus deserticola	Septoglomus	Kalanchoe blossfeldiana	Crassulaceae	Herbaceous	Perennial	Forb	Dicots	Moderate	10	10	263	203.88	88.9866	88.9866
10	6	Asrar et al.	2014	Moderate	Septoglomus deserticola	Septoglomus	Kalanchoe blossfeldiana	Crassulaceae	Herbaceous	Perennial	Forb	Dicots	Moderate	10	10	218.23	182.36	53.991	53.991
10	7	Asrar et al.	2014	Moderate	Septoglomus deserticola	Septoglomus	Kalanchoe blossfeldiana	Crassulaceae	Herbaceous	Perennial	Forb	Dicots	Moderate	10	10	191.33	150.074	62.0979	62.0979
15	8	Bharti et al.	2013	Non saline	Funneliformis mosseae	Funneliformis	Mentha arvensis	Lamiaceae	Herbaceous	Perennial	Forb	Dicots	Long	3	3	0.609	0.471	0.169282	0.34641
15	9	Bharti et al.	2013	High	Funneliformis mosseae	Funneliformis	Mentha arvensis	Lamiaceae	Herbaceous	Perennial	Forb	Dicots	Long	3	3	0.415	0.294	0.069282	0.234641
15	10	Bharti et al.	2013	Non saline	Rhizophagus aggregatum	Rhizophagus	Mentha arvensis	Lamiaceae	Herbaceous	Perennial	Forb	Dicots	Long	3	3	0.551	0.551	0.34641	0.34641
15	11	Bharti et al.	2013	High	Rhizophagus aggregatum	Rhizophagus	Mentha arvensis	Lamiaceae	Herbaceous	Perennial	Forb	Dicots	Long	3	3	0.306	0.306	0.103923	0.103923
15	12	Bharti et al.	2013	Non saline	Rhizophagus fasciculatus	Rhizophagus	Mentha arvensis	Lamiaceae	Herbaceous	Perennial	Forb	Dicots	Long	3	3	0.56	0.56	0.173205	0.173205
15	13	Bharti et al.	2013	High	Rhizophagus fasciculatus	Rhizophagus	Mentha arvensis	Lamiaceae	Herbaceous	Perennial	Forb	Dicots	Long	3	3	0.469	0.469	0.069282	0.106928
15	14	Bharti et al.	2013	Non saline	Rhizophagus intraradices	Rhizophagus	Mentha arvensis	Lamiaceae	Herbaceous	Perennial	Forb	Dicots	Long	3	3	0.584	0.584	0.0866025	0.0866025
15	15	Bharti et al.	2013	High	Rhizophagus intraradices	Rhizophagus	Mentha arvensis	Lamiaceae	Herbaceous	Perennial	Forb	Dicots	Long	3	3	0.393	0.393	0.151962	0.105196
45	16	Latef and Chaoxing	2014	Non saline	Funneliformis mosseae	Funneliformis	Capsicum annuum	Solanaceae	Herbaceous	Annual/Perennial	Forb/Shrub	Dicots	Long	6	6	0.693	0.46	0.322108	0.322108
45	17	Latef and Chaoxing	2014	Low	Funneliformis mosseae	Funneliformis	Capsicum annuum	Solanaceae	Herbaceous	Annual/Perennial	Forb/Shrub	Dicots	Long	6	6	0.553	0.342	0.231961	0.231961
45	18	Latef and Chaoxing	2014	Low	Funneliformis mosseae	Funneliformis	Capsicum annuum	Solanaceae	Herbaceous	Annual/Perennial	Forb/Shrub	Dicots	Long	6	6	0.314	0.232	0.0901462	0.0901462
45	19	Latef and Chaoxing	2014	Moderate	Funneliformis mosseae	Funneliformis	Capsicum annuum	Solanaceae	Herbaceous	Annual/Perennial	Forb/Shrub	Dicots	Long	6	6	0.251	0.158	0.102239	0.102239
57	20	Porcel et al.	2015	Non saline	Claroideoglomus etunicatum	Claroideoglomus	Oryza sativa	Poaceae	Herbaceous	Annual	Grass	Monocots	Moderate	15	15	1.439	1.221	0.325331	0.313712
57	21	Porcel et al.	2015	Low	Claroideoglomus etunicatum	Claroideoglomus	Oryza sativa	Poaceae	Herbaceous	Annual	Grass	Monocots	Moderate	15	15	1.163	1.128	0.232379	0.18203
57	22	Porcel et al.	2015	Moderate	Claroideoglomus etunicatum	Claroideoglomus	Oryza sativa	Poaceae	Herbaceous	Annual	Grass	Monocots	Moderate	15	15	1.51	1.31	0.294347	0.282728
81	23	Lin et al.	2017	Non saline	Funneliformis mosseae	Funneliformis	Leymus chinensis	Poaceae	Herbaceous	Perennial	Grass	Monocots	Short	6	6	2.12083	1.93209	0.251393	0.290193
81	24	Lin et al.	2017	Moderate	Funneliformis mosseae	Funneliformis	Leymus chinensis	Poaceae	Herbaceous	Perennial	Grass	Monocots	Short	6	6	1.90272	1.72187	0.521603	0.966896
81	25	Lin et al.	2017	Moderate	Funneliformis mosseae	Funneliformis	Leymus chinensis	Poaceae	Herbaceous	Perennial	Grass	Monocots	Short	6	6	1.72402	1.63792	0.580137	0.772277
85	26	Porcel et al.	2015	Non saline	Claroideoglomus etunicatum	Claroideoglomus	Oryza sativa	Poaceae	Herbaceous	Annual	Grass	Monocots	Moderate	15	15	1.43548	1.22067	0.308263	0.307468
85	27	Porcel et al.	2015	Low	Claroideoglomus etunicatum	Claroideoglomus	Oryza sativa	Poaceae	Herbaceous	Annual	Grass	Monocots	Moderate	15	15	1.15109	1.11656	0.226165	0.204847
85	28	Porcel et al.	2015	Moderate	Claroideoglomus etunicatum	Claroideoglomus	Oryza sativa	Poaceae	Herbaceous	Annual	Grass	Monocots	Moderate	15	15	1.48694	1.28782	0.307468	0.288136
90	29	Shamshiri and Fattahi	2016	Non saline	Funneliformis mosseae	Funneliformis	Pistacia vera	Anacardiaceae	Woody	Perennial	Tree	Dicots	Long	4	4	1.20425	0.755608	0.585274	0.178636
90	30	Shamshiri and Fattahi	2016	Low	Funneliformis mosseae	Funneliformis	Pistacia vera	Anacardiaceae	Woody	Perennial	Tree	Dicots	Long	4	4	1.19625	0.782792	0.918045	0.165575
90	31	Shamshiri and Fattahi	2016	Moderate	Funneliformis mosseae	Funneliformis	Pistacia vera	Anacardiaceae	Woody	Perennial	Tree	Dicots	Long	4	4	0.962049	0.688818	0.185247	0.30484
90	32	Shamshiri and Fattahi	2016	High	Funneliformis mosseae	Funneliformis	Pistacia vera	Anacardiaceae	Woody	Perennial	Tree	Dicots	Long	4	4	0.737715	0.49562	0.152433	0.152433
99	33	Wang et al.	2019	Non saline	Funneliformis mosseae	Funneliformis	Zelkova serrata	Ulmaceae	Woody	Perennial	Tree	Dicots	Long	24	24	0.499748	0.419144	0.325776	0.178976
99	34	Wang et al.	2019	Non saline	Funneliformis mosseae	Funneliformis	Zelkova serrata	Ulmaceae	Woody	Perennial	Tree	Dicots	Long	24	24	0.447355	0.419144	0.217184	0.278976
99	35	Wang et al.	2019	Non saline	Diversispora versiformis	Diversispora	Zelkova serrata	Ulmaceae	Woody	Perennial	Tree	Dicots	Long	24	24	0.378841	0.419144	0.108592	0.078976
99	36	Wang et al.	2019	Moderate	Funneliformis mosseae	Funneliformis	Zelkova serrata	Ulmaceae	Woody	Perennial	Tree	Dicots	Long	24	24	0.425189	0.366751	0.078976	0.138208
99	37	Wang et al.	2019	Moderate	Funneliformis mosseae	Funneliformis	Zelkova serrata	Ulmaceae	Woody	Perennial	Tree	Dicots	Long	24	24	0.36272	0.366751	0.266544	0.138208
99	38	Wang et al.	2019	Moderate	Diversispora versiformis	Diversispora	Zelkova serrata	Ulmaceae	Woody	Perennial	Tree	Dicots	Long	24	24	0.308312	0.366751	0.29616	0.138208

## Sheet: CAT
PaperNo.	Study SL	Author	Year	Salinity_level	Mycorrhiza_Species	Mycorrhiza_Genera	Plant_Species	Plant_Family	Plant_Life_Styles	Plant_Lifecycle	Plant_Life_Forms	Plant_Clade	Salinity_duration	Ne	Nc	Me	Se	Mc	Sc
10	1	Asrar et al.	2014	Low	Septoglomus deserticola	Septoglomus	Kalanchoe blossfeldiana	Crassulaceae	Herbaceous	Perennial	Forb	Dicots	Moderate	10	10	57.831	21.181	43.759	21.181
10	2	Asrar et al.	2014	Moderate	Septoglomus deserticola	Septoglomus	Kalanchoe blossfeldiana	Crassulaceae	Herbaceous	Perennial	Forb	Dicots	Moderate	10	10	64.771	13.0575	56.096	13.0575
10	3	Asrar et al.	2014	Moderate	Septoglomus deserticola	Septoglomus	Kalanchoe blossfeldiana	Crassulaceae	Herbaceous	Perennial	Forb	Dicots	Moderate	10	10	71.903	19.441	58.987	19.441
10	4	Asrar et al.	2014	Non saline	Septoglomus deserticola	Septoglomus	Kalanchoe blossfeldiana	Crassulaceae	Herbaceous	Perennial	Forb	Dicots	Moderate	10	10	33.734	16.828	22.554	16.828
14	5	Bharti and Garg	2019	Low	Rhizophagus intraradices	Rhizophagus	Cicer arietinum	Fabaceae	Herbaceous	Annual	Forb	Dicots	Long	6	6	5264.15	685.268	3877.35	489.077
14	6	Bharti and Garg	2019	Low	Rhizophagus intraradices	Rhizophagus	Cicer arietinum	Fabaceae	Herbaceous	Annual	Forb	Dicots	Long	6	6	4160.37	415.948	3141.53	411.465
14	7	Bharti and Garg	2019	Low	Rhizophagus intraradices	Rhizophagus	Cicer arietinum	Fabaceae	Herbaceous	Annual	Forb	Dicots	Long	6	6	2575.47	485.832	1924.52	346.627
14	8	Bharti and Garg	2019	Low	Rhizophagus intraradices	Rhizophagus	Cicer arietinum	Fabaceae	Herbaceous	Annual	Forb	Dicots	Long	6	6	2094.33	277.307	1528.3	415.972
14	9	Bharti and Garg	2019	Non saline	Rhizophagus intraradices	Rhizophagus	Cicer arietinum	Fabaceae	Herbaceous	Annual	Forb	Dicots	Long	6	6	1641.5	346.627	1245.28	207.962
14	10	Bharti and Garg	2019	Non saline	Rhizophagus intraradices	Rhizophagus	Cicer arietinum	Fabaceae	Herbaceous	Annual	Forb	Dicots	Long	6	6	1132.07	138.641	735.84	346.701
17	11	Borde et al.	2011	Moderate	Rhizophagus fasciculatus	Rhizophagus	Pennisetum glaucum	Poaceae	Herbaceous	Annual	Grass	Monocots	Moderate	3	3	0.552	0.190526	0.463	0.245033
17	12	Borde et al.	2011	Moderate	Rhizophagus fasciculatus	Rhizophagus	Pennisetum glaucum	Poaceae	Herbaceous	Annual	Grass	Monocots	Moderate	3	3	0.656	0.0727461	0.442	0.0814064
17	13	Borde et al.	2011	Non saline	Rhizophagus fasciculatus	Rhizophagus	Pennisetum glaucum	Poaceae	Herbaceous	Annual	Grass	Monocots	Moderate	3	3	0.337	0.0450333	0.41	0.145033
21	14	Chang et al.	2018	Non saline	Rhizophagus intraradices	Rhizophagus	Elaeagnus angustifolia	Elaeagnaceae	Woody	Perennial	Shrub/Tree	Dicots	Short	3	3	5.59	0.710141	4.98	0.710141
25	15	Dudhane et al.	2011	Moderate	Rhizophagus fasciculatus	Rhizophagus	Gmelina arborea.	Lamiaceae	Woody	Perennial	Tree	Dicots	Long	6	6	0.027	0.00489898	0.023	0.0124495
25	16	Dudhane et al.	2011	Moderate	Rhizophagus fasciculatus	Rhizophagus	Gmelina arborea.	Lamiaceae	Woody	Perennial	Tree	Dicots	Long	6	6	0.025	0.00489898	0.017	0.00244949
25	17	Dudhane et al.	2011	Non saline	Rhizophagus fasciculatus	Rhizophagus	Gmelina arborea.	Lamiaceae	Woody	Perennial	Tree	Dicots	Long	6	6	0.021	0.00244949	0.019	0.00244949
32	18	Estrada et al.	2013c	Low	Septoglomus constrictum	Septoglomus	Zea mays	Poaceae	Herbaceous	Annual	Grass	Monocots	Short	10	10	8.05	2.30846	11.26	3.13065
32	19	Estrada et al.	2013c	Low	Rhizophagus intraradices	Rhizophagus	Zea mays	Poaceae	Herbaceous	Annual	Grass	Monocots	Short	10	10	14.86	5.09127	11.26	3.13065
32	20	Estrada et al.	2013c	Low	Claroideoglomus etunicatum	Claroideoglomus	Zea mays	Poaceae	Herbaceous	Annual	Grass	Monocots	Short	10	10	6.73	3.82636	11.26	3.13065
32	21	Estrada et al.	2013c	Low	Rhizophagus intraradices	Rhizophagus	Zea mays	Poaceae	Herbaceous	Annual	Grass	Monocots	Short	10	10	5.78	4.96478	11.26	3.13065
32	22	Estrada et al.	2013c	Moderate	Rhizophagus intraradices	Rhizophagus	Zea mays	Poaceae	Herbaceous	Annual	Grass	Monocots	Short	10	10	9.36	2.46658	6.55	2.68794
32	23	Estrada et al.	2013c	Moderate	Claroideoglomus etunicatum	Claroideoglomus	Zea mays	Poaceae	Herbaceous	Annual	Grass	Monocots	Short	10	10	5.48	1.54952	6.55	2.68794
32	24	Estrada et al.	2013c	Moderate	Rhizophagus intraradices	Rhizophagus	Zea mays	Poaceae	Herbaceous	Annual	Grass	Monocots	Short	10	10	6.06	2.40333	6.55	2.68794
32	25	Estrada et al.	2013c	Moderate	Septoglomus constrictum	Septoglomus	Zea mays	Poaceae	Herbaceous	Annual	Grass	Monocots	Short	10	10	10.01	4.83828	6.55	2.68794
32	26	Estrada et al.	2013c	Non saline	Claroideoglomus etunicatum	Claroideoglomus	Zea mays	Poaceae	Herbaceous	Annual	Grass	Monocots	Short	10	10	5.61	3.13065	3.79	2.15035
32	27	Estrada et al.	2013c	Non saline	Rhizophagus intraradices	Rhizophagus	Zea mays	Poaceae	Herbaceous	Annual	Grass	Monocots	Short	10	10	4.21	2.52982	3.79	2.15035
32	28	Estrada et al.	2013c	Non saline	Rhizophagus intraradices	Rhizophagus	Zea mays	Poaceae	Herbaceous	Annual	Grass	Monocots	Short	10	10	2.35	1.92899	3.79	2.15035
32	29	Estrada et al.	2013c	Non saline	Septoglomus constrictum	Septoglomus	Zea mays	Poaceae	Herbaceous	Annual	Grass	Monocots	Short	10	10	3.52	3.06741	3.79	2.15035
33	30	Evelin and Kapoor	2014	Low	Rhizophagus intraradices	Rhizophagus	Trigonella foenum-graecum	Fabaceae	Herbaceous	Annual	Forb	Dicots	Short	3	3	451.6	48.6164	378.6	48.6164
33	31	Evelin and Kapoor	2014	Moderate	Rhizophagus intraradices	Rhizophagus	Trigonella foenum-graecum	Fabaceae	Herbaceous	Annual	Forb	Dicots	Short	3	3	314.5	58.6061	402.5	58.6061
33	32	Evelin and Kapoor	2014	Moderate	Rhizophagus intraradices	Rhizophagus	Trigonella foenum-graecum	Fabaceae	Herbaceous	Annual	Forb	Dicots	Short	3	3	518.3	161.367	276	161.367
33	33	Evelin and Kapoor	2014	Non saline	Rhizophagus intraradices	Rhizophagus	Trigonella foenum-graecum	Fabaceae	Herbaceous	Annual	Forb	Dicots	Short	3	3	390	102.228	236.5	102.228
42	34	Garg and Manchanda	2009	Low	Funneliformis mosseae	Funneliformis	Cajanus cajan	Fabaceae	Woody	Annual/Perennial	Shrub	Dicots	Moderate	6	6	144.52	27.6705	119.35	27.6705
42	35	Garg and Manchanda	2009	Low	Funneliformis mosseae	Funneliformis	Cajanus cajan	Fabaceae	Woody	Annual/Perennial	Shrub	Dicots	Moderate	6	6	299.3	99.4246	208.86	99.4246
42	36	Garg and Manchanda	2009	Low	Funneliformis mosseae	Funneliformis	Cajanus cajan	Fabaceae	Woody	Annual/Perennial	Shrub	Dicots	Moderate	6	6	409.32	195.771	231.24	195.771
42	37	Garg and Manchanda	2009	Non saline	Funneliformis mosseae	Funneliformis	Cajanus cajan	Fabaceae	Woody	Annual/Perennial	Shrub	Dicots	Moderate	6	6	206.99	82.2011	199.53	28.2011
46	38	Ghorbanli et al.	2004	Low	Claroideoglomus etunicatum	Claroideoglomus	Glycine max	Fabaceae	Herbaceous	Annual	Forb	Dicots	Moderate	3	3	3.46	0.444442	3.35	1.31111
46	39	Ghorbanli et al.	2004	Moderate	Claroideoglomus etunicatum	Claroideoglomus	Pistacia vera	Fabaceae	Herbaceous	Annual	Forb	Dicots	Moderate	3	3	6.53	0.64444	6.17	0.733333
46	40	Ghorbanli et al.	2004	Moderate	Claroideoglomus etunicatum	Claroideoglomus	Pistacia vera	Fabaceae	Herbaceous	Annual	Forb	Dicots	Moderate	3	3	4.8	0.711107	4.5	2.33333
46	41	Ghorbanli et al.	2004	Non saline	Claroideoglomus etunicatum	Claroideoglomus	Glycine max	Fabaceae	Herbaceous	Annual	Forb	Dicots	Moderate	3	3	3.35	0.888883	3.28	0.622222
47	42	Hajiboland et al.	2010	Low	Rhizophagus intraradices	Rhizophagus	Solanum lycopersicum	Solanaceae	Herbaceous	Annual	Forb	Dicots	Long	4	4	612	85	529	130
47	43	Hajiboland et al.	2010	Low	Rhizophagus intraradices	Rhizophagus	Solanum lycopersicum	Solanaceae	Herbaceous	Annual	Forb	Dicots	Long	4	4	710	120	454	260
47	44	Hajiboland et al.	2010	Moderate	Rhizophagus intraradices	Rhizophagus	Solanum lycopersicum	Solanaceae	Herbaceous	Annual	Forb	Dicots	Long	4	4	1008	160	680	75
47	45	Hajiboland et al.	2010	Non saline	Rhizophagus intraradices	Rhizophagus	Solanum lycopersicum	Solanaceae	Herbaceous	Annual	Forb	Dicots	Long	4	4	451	82	302	48
47	46	Hajiboland et al.	2010	Non saline	Rhizophagus intraradices	Rhizophagus	Solanum lycopersicum	Solanaceae	Herbaceous	Annual	Forb	Dicots	Long	4	4	370	32	270	97
49	47	He et al.	2007	Low	Funneliformis mosseae	Funneliformis	Solanum lycopersicum	Solanaceae	Herbaceous	Annual	Forb	Dicots	Long	6	6	29.363	4.36279	28.854	4.49309
49	48	He et al.	2007	Low	Funneliformis mosseae	Funneliformis	Solanum lycopersicum	Solanaceae	Herbaceous	Annual	Forb	Dicots	Long	6	6	32.926	4.36254	31.908	4.98471
49	49	He et al.	2007	Non saline	Funneliformis mosseae	Funneliformis	Solanum lycopersicum	Solanaceae	Herbaceous	Annual	Forb	Dicots	Long	6	6	15.6234	1.86896	15.114	3.73792
52	50	Huang et al.	2010	Low	Funneliformis mosseae	Funneliformis	Solanum lycopersicum	Solanaceae	Herbaceous	Annual	Forb	Dicots	Long	10	10	154.771	19.5524	141.78	19.5524
52	51	Huang et al.	2010	Moderate	Funneliformis mosseae	Funneliformis	Solanum lycopersicum	Solanaceae	Herbaceous	Annual	Forb	Dicots	Long	10	10	246.891	78.2158	194.926	78.2158
52	52	Huang et al.	2010	Non saline	Funneliformis mosseae	Funneliformis	Solanum lycopersicum	Solanaceae	Herbaceous	Annual	Forb	Dicots	Long	10	10	53.202	21.3296	39.03	21.3296
67	53	Younesi et al.	2013	Low	Funneliformis mosseae	Funneliformis	Glycine max	Fabaceae	Herbaceous	Annual	Forb	Dicots	Long	4	4	15.11	1.33	8.03	1.45
67	54	Younesi et al.	2013	Non saline	Funneliformis mosseae	Funneliformis	Glycine max	Fabaceae	Herbaceous	Annual	Forb	Dicots	Long	4	4	9.84	1.85	7.86	3.23
79	55	Kohler et al.	2009	Moderate	Funneliformis mosseae	Funneliformis	Lactuca sativa	Asteraceae	Herbaceous	Annual	Forb	Dicots	Moderate	5	5	11	8.20575	19	8.20575
79	56	Kohler et al.	2009	Moderate	Rhizophagus irregularis	Rhizophagus	Lactuca sativa	Asteraceae	Herbaceous	Annual	Forb	Dicots	Moderate	5	5	9	3.25719	19	10.2572
79	57	Kohler et al.	2009	Non saline	Rhizophagus irregularis	Rhizophagus	Lactuca sativa	Asteraceae	Herbaceous	Annual	Forb	Dicots	Moderate	5	5	31	2.94887	29.1	5.94887
79	58	Kohler et al.	2009	Non saline	Funneliformis mosseae	Funneliformis	Lactuca sativa	Asteraceae	Herbaceous	Annual	Forb	Dicots	Moderate	5	5	21.5	7.79547	29.1	7.79547
80	59	Latefa and Chaoxingb	2011	Low	Funneliformis mosseae	Funneliformis	Solanum lycopersicum	Solanaceae	Herbaceous	Annual	Forb	Dicots	Long	6	6	10.6233	14436108	8.48937	2.89517
80	60	Latefa and Chaoxingb	2011	Moderate	Funneliformis mosseae	Funneliformis	Solanum lycopersicum	Solanaceae	Herbaceous	Annual	Forb	Dicots	Long	6	6	3.65135	1.49194	1.94697	1.04693
80	61	Latefa and Chaoxingb	2011	Non saline	Funneliformis mosseae	Funneliformis	Solanum lycopersicum	Solanaceae	Herbaceous	Annual	Forb	Dicots	Long	6	6	10.8301	1.19613	5.34944	2.08872
96	62	Tofighi et al.	2017	Moderate	Funneliformis mosseae	Funneliformis	Triticum aestivum	Poaceae	Herbaceous	Annual	Grass	Monocots	Moderate	4	4	3.48859	0.41045	2.14759	0.456
96	63	Tofighi et al.	2017	Non saline	Funneliformis mosseae	Funneliformis	Triticum aestivum	Poaceae	Herbaceous	Annual	Grass	Monocots	Moderate	4	4	0.238867	0.056	0.0753962	0.0152665
101	64	Wu et al.	2010	Moderate	Funneliformis mosseae	Funneliformis	Poncirus trifoliata	Rutaceae	Woody	Perennial	Tree	Dicots	Long	4	4	3.32793	0.847187	2.29436	0.847187
101	65	Wu et al.	2010	Moderate	Diversispora versiformis	Diversispora	Poncirus trifoliata	Rutaceae	Woody	Perennial	Tree	Dicots	Long	4	4	4.05805	1.44565	2.29436	1.44565
101	66	Wu et al.	2010	Non saline	Funneliformis mosseae	Funneliformis	Poncirus trifoliata	Rutaceae	Woody	Perennial	Tree	Dicots	Long	4	4	2.72023	0.53666	2.06551	0.53666
101	67	Wu et al.	2010	Non saline	Diversispora versiformis	Diversispora	Poncirus trifoliata	Rutaceae	Woody	Perennial	Tree	Dicots	Long	4	4	3.54173	1.21002	2.06551	1.21002

## Sheet: EC
PaperNo.	Study SL	Author	Year	Salinity_level	Mycorrhiza_Species	Mycorrhiza_Genera	Plant_Species	Plant_Family	Plant_Life_Styles	Plant_Lifecycle	Plant_Life_Forms	Plant_Clade	Salinity_duration	Ne	Nc	Me	Se	Mc	Sc
14	1	Bharti and Garg	2019	Non saline	Rhizophagus intraradices	Rhizophagus	Cicer arietinum	Fabaceae	Herbaceous	Annual	Forb	Dicots	Long	6	6	19.99	2.51439	21.45	4.40908
14	2	Bharti and Garg	2019	Non saline	Rhizophagus intraradices	Rhizophagus	Cicer arietinum	Fabaceae	Herbaceous	Annual	Forb	Dicots	Long	6	6	22.8	3.53889	23.56	8.08332
14	3	Bharti and Garg	2019	Low	Rhizophagus intraradices	Rhizophagus	Cicer arietinum	Fabaceae	Herbaceous	Annual	Forb	Dicots	Long	6	6	39.94	4.36742	43.56	15.3717
14	4	Bharti and Garg	2019	Low	Rhizophagus intraradices	Rhizophagus	Cicer arietinum	Fabaceae	Herbaceous	Annual	Forb	Dicots	Long	6	6	41.98	11.801	50.12	20.9431
14	5	Bharti and Garg	2019	Low	Rhizophagus intraradices	Rhizophagus	Cicer arietinum	Fabaceae	Herbaceous	Annual	Forb	Dicots	Long	6	6	30.98	10.0864	36.5	9.18559
14	6	Bharti and Garg	2019	Low	Rhizophagus intraradices	Rhizophagus	Cicer arietinum	Fabaceae	Herbaceous	Annual	Forb	Dicots	Long	6	6	54.78	35.2015	60.28	24.2499
30	7	Estrada et al.	2013a	Non saline	Rhizophagus intraradices	Rhizophagus	Zea mays	Poaceae	Herbaceous	Annual	Grass	Monocots	Short	10	10	12.46	2.28633	16.32	5.33792
30	8	Estrada et al.	2013a	Non saline	Rhizophagus intraradices	Rhizophagus	Zea mays	Poaceae	Herbaceous	Annual	Grass	Monocots	Short	10	10	14.39	7.12777	16.32	5.33792
30	9	Estrada et al.	2013a	Moderate	Rhizophagus intraradices	Rhizophagus	Zea mays	Poaceae	Herbaceous	Annual	Grass	Monocots	Short	10	10	15.03	2.03334	18.25	3.82636
30	10	Estrada et al.	2013a	Moderate	Rhizophagus intraradices	Rhizophagus	Zea mays	Poaceae	Herbaceous	Annual	Grass	Monocots	Short	10	10	12.46	3.04844	18.25	3.82636
30	11	Estrada et al.	2013a	Low	Rhizophagus intraradices	Rhizophagus	Zea mays	Poaceae	Herbaceous	Annual	Grass	Monocots	Short	10	10	15.68	4.31967	16.24	5.07862
30	12	Estrada et al.	2013a	Low	Rhizophagus intraradices	Rhizophagus	Zea mays	Poaceae	Herbaceous	Annual	Grass	Monocots	Short	10	10	11.73	7.12777	16.24	5.07862
32	13	Estrada et al.	2013c	Non saline	Claroideoglomus etunicatum	Claroideoglomus	Zea mays	Poaceae	Herbaceous	Annual	Grass	Monocots	Short	10	10	13.59	2.24522	16.51	11.9534
32	14	Estrada et al.	2013c	Non saline	Septoglomus constrictum	Septoglomus	Zea mays	Poaceae	Herbaceous	Annual	Grass	Monocots	Short	10	10	13.62	2.27684	16.51	11.9534
32	15	Estrada et al.	2013c	Non saline	Rhizophagus intraradices	Rhizophagus	Zea mays	Poaceae	Herbaceous	Annual	Grass	Monocots	Short	10	10	14.54	4.64855	16.51	11.9534
32	16	Estrada et al.	2013c	Non saline	Rhizophagus intraradices	Rhizophagus	Zea mays	Poaceae	Herbaceous	Annual	Grass	Monocots	Short	10	10	12.62	4.64855	16.51	11.9534
32	17	Estrada et al.	2013c	Moderate	Rhizophagus intraradices	Rhizophagus	Zea mays	Poaceae	Herbaceous	Annual	Grass	Monocots	Short	10	10	15.42	1.64438	18.3	4.42719
32	18	Estrada et al.	2013c	Moderate	Claroideoglomus etunicatum	Claroideoglomus	Zea mays	Poaceae	Herbaceous	Annual	Grass	Monocots	Short	10	10	13.46	1.70763	18.3	4.42719
32	19	Estrada et al.	2013c	Moderate	Septoglomus constrictum	Septoglomus	Zea mays	Poaceae	Herbaceous	Annual	Grass	Monocots	Short	10	10	14.52	2.27684	18.3	4.42719
32	20	Estrada et al.	2013c	Moderate	Rhizophagus intraradices	Rhizophagus	Zea mays	Poaceae	Herbaceous	Annual	Grass	Monocots	Short	10	10	12.5	4.42719	18.3	4.42719
32	21	Estrada et al.	2013c	Low	Rhizophagus intraradices	Rhizophagus	Zea mays	Poaceae	Herbaceous	Annual	Grass	Monocots	Short	10	10	15.53	2.24522	16.5	3.85798
32	22	Estrada et al.	2013c	Low	Septoglomus constrictum	Septoglomus	Zea mays	Poaceae	Herbaceous	Annual	Grass	Monocots	Short	10	10	13.54	7.0835	16.5	3.85798
32	23	Estrada et al.	2013c	Low	Claroideoglomus etunicatum	Claroideoglomus	Zea mays	Poaceae	Herbaceous	Annual	Grass	Monocots	Short	10	10	13.51	7.0835	16.5	3.85798
32	24	Estrada et al.	2013c	Low	Rhizophagus intraradices	Rhizophagus	Zea mays	Poaceae	Herbaceous	Annual	Grass	Monocots	Short	10	10	11.59	6.86214	16.5	3.85798
34	25	Evelin et al.	2012	Non saline	Rhizophagus intraradices	Rhizophagus	Trigonella foenum-graecum	Fabaceae	Herbaceous	Annual	Forb	Dicots	Short	3	3	22.35	6.72	21.32	9.94
34	26	Evelin et al.	2012	Moderate	Rhizophagus intraradices	Rhizophagus	Trigonella foenum-graecum	Fabaceae	Herbaceous	Annual	Forb	Dicots	Short	3	3	27.72	10.57	35.25	9.38
34	27	Evelin et al.	2012	Moderate	Rhizophagus intraradices	Rhizophagus	Trigonella foenum-graecum	Fabaceae	Herbaceous	Annual	Forb	Dicots	Short	3	3	35.76	13.86	39.1	21.15
34	28	Evelin et al.	2012	Low	Rhizophagus intraradices	Rhizophagus	Trigonella foenum-graecum	Fabaceae	Herbaceous	Annual	Forb	Dicots	Short	3	3	24.95	2.566	30.49	15.05
35	29	Evelin et al.	2013	Non saline	Rhizophagus intraradices	Rhizophagus	Trigonella foenum-graecum	Fabaceae	Herbaceous	Annual	Forb	Dicots	Not Provided	3	3	22.3	4.70711	21.3	12.7279
35	30	Evelin et al.	2013	Moderate	Rhizophagus intraradices	Rhizophagus	Trigonella foenum-graecum	Fabaceae	Herbaceous	Annual	Forb	Dicots	Not Provided	3	3	27.5	3.6364	35.2	23.2638
35	31	Evelin et al.	2013	Moderate	Rhizophagus intraradices	Rhizophagus	Trigonella foenum-graecum	Fabaceae	Herbaceous	Annual	Forb	Dicots	Not Provided	3	3	35.6	10.3945	38.9	16.9706
35	32	Evelin et al.	2013	Low	Rhizophagus intraradices	Rhizophagus	Trigonella foenum-graecum	Fabaceae	Herbaceous	Annual	Forb	Dicots	Not Provided	3	3	24.8	9.47487	30.5	10.8894
37	33	Garg and Bhandari	2016a	Non saline	Funneliformis mosseae	Funneliformis	Cicer arietinum	Fabaceae	Herbaceous	Annual	Forb	Dicots	Long	6	6	20.4	3.41641	22.6	10.6553
37	34	Garg and Bhandari	2016a	Non saline	Funneliformis mosseae	Funneliformis	Cicer arietinum	Fabaceae	Herbaceous	Annual	Forb	Dicots	Long	6	6	17.5	9.602	19.6	6.2462
37	35	Garg and Bhandari	2016a	Moderate	Funneliformis mosseae	Funneliformis	Cicer arietinum	Fabaceae	Herbaceous	Annual	Forb	Dicots	Long	6	6	32.7	5.73181	46.5	19.6204
37	36	Garg and Bhandari	2016a	Moderate	Funneliformis mosseae	Funneliformis	Cicer arietinum	Fabaceae	Herbaceous	Annual	Forb	Dicots	Long	6	6	50.7	44.1153	63.2	14.256
37	37	Garg and Bhandari	2016a	Low	Funneliformis mosseae	Funneliformis	Cicer arietinum	Fabaceae	Herbaceous	Annual	Forb	Dicots	Long	6	6	19.1	2.4899	24	14.6969
37	38	Garg and Bhandari	2016a	Low	Funneliformis mosseae	Funneliformis	Cicer arietinum	Fabaceae	Herbaceous	Annual	Forb	Dicots	Long	6	6	29.7	3.90631	34.7	15.9462
37	39	Garg and Bhandari	2016a	Low	Funneliformis mosseae	Funneliformis	Cicer arietinum	Fabaceae	Herbaceous	Annual	Forb	Dicots	Long	6	6	39.2	5.2909	46.7	17.4894
37	40	Garg and Bhandari	2016a	Low	Funneliformis mosseae	Funneliformis	Cicer arietinum	Fabaceae	Herbaceous	Annual	Forb	Dicots	Long	6	6	25.4	10.2578	33.8	11.831
41	41	Garg and Chandel	2012	Non saline	Funneliformis mosseae	Funneliformis	Cajanus cajan	Fabaceae	Woody	Annual/Perennial	Shrub	Dicots	Moderate	6	6	19.76	6.43971	20.25	3.55666
41	42	Garg and Chandel	2012	Non saline	Funneliformis mosseae	Funneliformis	Cajanus cajan	Fabaceae	Woody	Annual/Perennial	Shrub	Dicots	Moderate	6	6	30.97	14.3859	31.47	7.97064
41	43	Garg and Chandel	2012	Low	Funneliformis mosseae	Funneliformis	Cajanus cajan	Fabaceae	Woody	Annual/Perennial	Shrub	Dicots	Moderate	6	6	27.66	4.1029	29.51	10.0331
41	44	Garg and Chandel	2012	Low	Funneliformis mosseae	Funneliformis	Cajanus cajan	Fabaceae	Woody	Annual/Perennial	Shrub	Dicots	Moderate	6	6	53.21	26.6627	55.34	26.8856
42	45	Garg and Manchanda	2009	Non saline	Funneliformis mosseae	Funneliformis	Cajanus cajan	Fabaceae	Woody	Annual/Perennial	Shrub	Dicots	Moderate	6	6	12.94	2.7727	15.34	2.7727
42	46	Garg and Manchanda	2009	Low	Funneliformis mosseae	Funneliformis	Cajanus cajan	Fabaceae	Woody	Annual/Perennial	Shrub	Dicots	Moderate	6	6	26.97	14.3354	40.01	14.3354
42	47	Garg and Manchanda	2009	Low	Funneliformis mosseae	Funneliformis	Cajanus cajan	Fabaceae	Woody	Annual/Perennial	Shrub	Dicots	Moderate	6	6	23.69	14.8411	37.19	14.8411
42	48	Garg and Manchanda	2009	Low	Funneliformis mosseae	Funneliformis	Cajanus cajan	Fabaceae	Woody	Annual/Perennial	Shrub	Dicots	Moderate	6	6	17.35	8.7438	34.37	18.7438
49	49	He et al.	2007	Non saline	Funneliformis mosseae	Funneliformis	Solanum lycopersicum	Solanaceae	Herbaceous	Annual	Forb	Dicots	Long	6	6	1.007	0.619721	1.007	0.541337
49	50	He et al.	2007	Low	Funneliformis mosseae	Funneliformis	Solanum lycopersicum	Solanaceae	Herbaceous	Annual	Forb	Dicots	Long	6	6	7.096	1.03184	7.127	2.03184
49	51	He et al.	2007	Low	Funneliformis mosseae	Funneliformis	Solanum lycopersicum	Solanaceae	Herbaceous	Annual	Forb	Dicots	Long	6	6	4.273	2.70914	4.273	1.08267
73	52	Zuccarini & Okurowska	2008	Non saline	Rhizophagus intraradices	Rhizophagus	Ocimum basilicum	Lamiaceae	Herbaceous	Annual/Perennial	Forb	Dicots	Long	3	3	4.16	0.511547	4.98	3.58083
73	53	Zuccarini & Okurowska	2008	Moderate	Rhizophagus intraradices	Rhizophagus	Ocimum basilicum	Lamiaceae	Herbaceous	Annual/Perennial	Forb	Dicots	Long	3	3	5.72	2.06862	5.83	1.02933

## Sheet: H2O2
PaperNo.	Study SL	Author	Year	Salinity_level	Mycorrhiza_Species	Mycorrhiza_Genera	Plant_Species	Plant_Family	Plant_Life_Styles	Plant_Lifecycle	Plant_Life_Forms	Plant_Clade	Salinity_duration	Ne	Nc	Me	Se	Mc	Sc
14	1	Bharti and Garg	2019	Non saline	Rhizophagus intraradices	Rhizophagus	Cicer arietinum	Fabaceae	Herbaceous	Annual	Forb	Dicots	Long	6	6	3.383	0.499696	3.791	0.399267
14	2	Bharti and Garg	2019	Non saline	Rhizophagus intraradices	Rhizophagus	Cicer arietinum	Fabaceae	Herbaceous	Annual	Forb	Dicots	Long	6	6	0.292	0.0416413	0.323	0.173485
14	3	Bharti and Garg	2019	Low	Rhizophagus intraradices	Rhizophagus	Cicer arietinum	Fabaceae	Herbaceous	Annual	Forb	Dicots	Long	6	6	8.56	2.60012	11.577	2.79853
14	4	Bharti and Garg	2019	Low	Rhizophagus intraradices	Rhizophagus	Cicer arietinum	Fabaceae	Herbaceous	Annual	Forb	Dicots	Long	6	6	7.133	1.60012	8.805	2.49725
14	5	Bharti and Garg	2019	Low	Rhizophagus intraradices	Rhizophagus	Cicer arietinum	Fabaceae	Herbaceous	Annual	Forb	Dicots	Long	6	6	0.421	0.105144	0.656	0.204164
14	6	Bharti and Garg	2019	Low	Rhizophagus intraradices	Rhizophagus	Cicer arietinum	Fabaceae	Herbaceous	Annual	Forb	Dicots	Long	6	6	0.36	0.134293	0.479	0.124495
32	7	Estrada et al.	2013c	Non saline	Claroideoglomus etunicatum	Claroideoglomus	Zea mays	Poaceae	Herbaceous	Annual	Grass	Monocots	Short	10	10	0.4	0.126491	0.23	0.158114
32	8	Estrada et al.	2013c	Non saline	Rhizophagus intraradices	Rhizophagus	Zea mays	Poaceae	Herbaceous	Annual	Grass	Monocots	Short	10	10	0.35	0.0948683	0.23	0.158114
32	9	Estrada et al.	2013c	Non saline	Rhizophagus intraradices	Rhizophagus	Zea mays	Poaceae	Herbaceous	Annual	Grass	Monocots	Short	10	10	0.34	0.0316228	0.23	0.158114
32	10	Estrada et al.	2013c	Non saline	Septoglomus constrictum	Septoglomus	Zea mays	Poaceae	Herbaceous	Annual	Grass	Monocots	Short	10	10	0.32	0.0980306	0.23	0.158114
32	11	Estrada et al.	2013c	Low	Claroideoglomus etunicatum	Claroideoglomus	Zea mays	Poaceae	Herbaceous	Annual	Grass	Monocots	Short	10	10	0.43	0.131623	0.37	0.158114
32	12	Estrada et al.	2013c	Low	Rhizophagus intraradices	Rhizophagus	Zea mays	Poaceae	Herbaceous	Annual	Grass	Monocots	Short	10	10	0.39	0.131623	0.37	0.158114
32	13	Estrada et al.	2013c	Low	Rhizophagus intraradices	Rhizophagus	Zea mays	Poaceae	Herbaceous	Annual	Grass	Monocots	Short	10	10	0.38	0.221359	0.37	0.158114
32	14	Estrada et al.	2013c	Low	Septoglomus constrictum	Septoglomus	Zea mays	Poaceae	Herbaceous	Annual	Grass	Monocots	Short	10	10	0.35	0.139487	0.37	0.158114
32	15	Estrada et al.	2013c	Moderate	Rhizophagus intraradices	Rhizophagus	Zea mays	Poaceae	Herbaceous	Annual	Grass	Monocots	Short	10	10	0.56	0.189737	0.55	0.158114
32	16	Estrada et al.	2013c	Moderate	Claroideoglomus etunicatum	Claroideoglomus	Zea mays	Poaceae	Herbaceous	Annual	Grass	Monocots	Short	10	10	0.48	0.0632456	0.55	0.158114
32	17	Estrada et al.	2013c	Moderate	Septoglomus constrictum	Septoglomus	Zea mays	Poaceae	Herbaceous	Annual	Grass	Monocots	Short	10	10	0.41	0.0948683	0.55	0.158114
32	18	Estrada et al.	2013c	Moderate	Rhizophagus intraradices	Rhizophagus	Zea mays	Poaceae	Herbaceous	Annual	Grass	Monocots	Short	10	10	0.36	0.126491	0.55	0.158114
33	19	Evelin and Kapoor	2014	Non saline	Rhizophagus intraradices	Rhizophagus	Trigonella foenum-graecum	Fabaceae	Herbaceous	Annual	Forb	Dicots	Short	3	3	8.67	2.53694	13.42	1.50688
33	20	Evelin and Kapoor	2014	Low	Rhizophagus intraradices	Rhizophagus	Trigonella foenum-graecum	Fabaceae	Herbaceous	Annual	Forb	Dicots	Short	3	3	11.81	1.50688	14.52	1.12583
33	21	Evelin and Kapoor	2014	Moderate	Rhizophagus intraradices	Rhizophagus	Trigonella foenum-graecum	Fabaceae	Herbaceous	Annual	Forb	Dicots	Short	3	3	14.83	1.76669	16.78	1.24708
33	22	Evelin and Kapoor	2014	Moderate	Rhizophagus intraradices	Rhizophagus	Trigonella foenum-graecum	Fabaceae	Herbaceous	Annual	Forb	Dicots	Short	3	3	14.45	0.814064	16.86	1.17779
47	23	Hajiboland et al.	2010	Non saline	Rhizophagus intraradices	Rhizophagus	Solanum lycopersicum	Solanaceae	Herbaceous	Annual	Forb	Dicots	Long	4	4	40	13.3	48	12.7
47	24	Hajiboland et al.	2010	Non saline	Rhizophagus intraradices	Rhizophagus	Solanum lycopersicum	Solanaceae	Herbaceous	Annual	Forb	Dicots	Long	4	4	39	5.7	40	3.2
47	25	Hajiboland et al.	2010	Low	Rhizophagus intraradices	Rhizophagus	Solanum lycopersicum	Solanaceae	Herbaceous	Annual	Forb	Dicots	Long	4	4	42	4.3	44	4.4
47	26	Hajiboland et al.	2010	Low	Rhizophagus intraradices	Rhizophagus	Solanum lycopersicum	Solanaceae	Herbaceous	Annual	Forb	Dicots	Long	4	4	41	4.8	42	3
47	27	Hajiboland et al.	2010	Moderate	Rhizophagus intraradices	Rhizophagus	Solanum lycopersicum	Solanaceae	Herbaceous	Annual	Forb	Dicots	Long	4	4	73	6	91	7.8
47	28	Hajiboland et al.	2010	Moderate	Rhizophagus intraradices	Rhizophagus	Solanum lycopersicum	Solanaceae	Herbaceous	Annual	Forb	Dicots	Long	4	4	70	6.2	90	6.3
96	29	Tofighi et al.	2017	Non saline	Funneliformis mosseae	Funneliformis	Triticum aestivum	Poaceae	Herbaceous	Annual	Grass	Monocots	Moderate	4	4	0.915306	0.15616	1.7976	0.312672
96	30	Tofighi et al.	2017	Moderate	Funneliformis mosseae	Funneliformis	Triticum aestivum	Poaceae	Herbaceous	Annual	Grass	Monocots	Moderate	4	4	2.92444	0.196781	3.88265	0.950249
101	31	Wu et al.	2010	Non saline	Funneliformis mosseae	Funneliformis	Poncirus trifoliata	Rutaceae	Woody	Perennial	Tree	Dicots	Long	4	4	13.6611	2.42075	16.6144	2.42075
101	32	Wu et al.	2010	Non saline	Diversispora versiformis	Diversispora	Poncirus trifoliata	Rutaceae	Woody	Perennial	Tree	Dicots	Long	4	4	12.4395	3.42205	16.6144	3.42205
101	33	Wu et al.	2010	Moderate	Funneliformis mosseae	Funneliformis	Poncirus trifoliata	Rutaceae	Woody	Perennial	Tree	Dicots	Long	4	4	18.3758	2.55601	21.4942	2.55601
101	34	Wu et al.	2010	Moderate	Diversispora versiformis	Diversispora	Poncirus trifoliata	Rutaceae	Woody	Perennial	Tree	Dicots	Long	4	4	17.8966	2.94883	21.4942	2.94883

## Sheet: RWC
PaperNo.	Study SL	Author	Salinity_level	Mycorrhiza Species	Plant Species	Plant Family	Plant Life Styles	Plant Lifecycle	Plant Life Forms/Growth habit	Plant Clade	Duration of salinity stress	Ne	Nc	Me	Mc	Se	Sc
7	1	Aroca et al. 2006	Non saline (control)	XXXX	Phaseolus vulgaris	Fabaceae	Herbaceous	Annual	Forb	Dicots	Short (< 40 days)	5	5	89.52	94.55	8.65358	7.8486
5	2	Al-Karaki, 2001	Low salinity ( <100 mMNacl or <10 dS/m)	Funneliformis mosseae	Triticum aestivum	Poaceae	Herbaceous	Annual	Grass	Monocots	Moderate (40-60 days)	4	4	82.19	62.01	10.8	9
5	3	Al-Karaki, 2001	Non saline (control)	Funneliformis mosseae	Triticum aestivum	Poaceae	Herbaceous	Annual	Grass	Monocots	Moderate (40-60 days)	4	4	70.92	45.1	10.2	15
5	4	Al-Karaki, 2001	Non saline (control)	Funneliformis mosseae	Triticum aestivum	Poaceae	Herbaceous	Annual	Grass	Monocots	Moderate (40-60 days)	4	4	85.46	88.43	13.2	12
5	5	Al-Karaki, 2001	Low salinity ( <100 mMNacl or <10 dS/m)	Funneliformis mosseae	Triticum aestivum	Poaceae	Herbaceous	Annual	Grass	Monocots	Moderate (40-60 days)	4	4	82.49	76.85	13.5	9
5	6	Al-Karaki, 2001	Low salinity ( <100 mMNacl or <10 dS/m)	Funneliformis mosseae	Triticum aestivum	Poaceae	Herbaceous	Annual	Grass	Monocots	Moderate (40-60 days)	4	4	56.68	40.95	5	3
7	7	Aroca et al. 2006	High salinity ( >200 mMNaCl or >20 dS/m))	XXXX	Phaseolus vulgaris	Fabaceae	Herbaceous	Annual	Forb	Dicots	Short (< 40 days)	5	5	93.14	71.61	21.019	7.8486
14	8	Bharti and Garg, 2019	Low salinity ( <100 mMNacl or <10 dS/m)	Rhizophagus intraradices	Cicer arietinum	Fabaceae	Herbaceous	Annual	Forb	Dicots	Long (> 60 days)	6	6	74.01	58.12	8.08332	40.4166
14	9	Bharti and Garg, 2019	Low salinity ( <100 mMNacl or <10 dS/m)	Rhizophagus intraradices	Cicer arietinum	Fabaceae	Herbaceous	Annual	Forb	Dicots	Long (> 60 days)	6	6	64.89	40.59	10.6553	11.6841
14	10	Bharti and Garg, 2019	Low salinity ( <100 mMNacl or <10 dS/m)	Rhizophagus intraradices	Cicer arietinum	Fabaceae	Herbaceous	Annual	Forb	Dicots	Long (> 60 days)	6	6	55.35	45.65	10.6553	12.7863
14	11	Bharti and Garg, 2019	Low salinity ( <100 mMNacl or <10 dS/m)	Rhizophagus intraradices	Cicer arietinum	Fabaceae	Herbaceous	Annual	Forb	Dicots	Long (> 60 days)	6	6	35.52	24	7.12802	9.62649
14	12	Bharti and Garg, 2019	Non saline (control)	Rhizophagus intraradices	Cicer arietinum	Fabaceae	Herbaceous	Annual	Forb	Dicots	Long (> 60 days)	6	6	88.06	83.21	7.34847	9.79796
14	13	Bharti and Garg, 2019	Non saline (control)	Rhizophagus intraradices	Cicer arietinum	Fabaceae	Herbaceous	Annual	Forb	Dicots	Long (> 60 days)	6	6	91.11	84.14	20.5757	23.0252
18	14	Borde et al. 2010	Moderate salinity ( 100-200 mMNacl or 10-20 dS/m)	XXXX	Allium sativum	Amaryllidaceae	Herbaceous	Annual	Forb	Monocots	Moderate (40-60 days)	9	9	90.43	85.611	18.03	39.753
18	15	Borde et al. 2010	High salinity ( >200 mMNaCl or >20 dS/m))	XXXX	Allium sativum	Amaryllidaceae	Herbaceous	Annual	Forb	Monocots	Moderate (40-60 days)	9	9	80.044	76.799	5.5963	6.3355
18	16	Borde et al. 2010	Moderate salinity ( 100-200 mMNacl or 10-20 dS/m)	XXXX	Allium sativum	Amaryllidaceae	Herbaceous	Annual	Forb	Monocots	Moderate (40-60 days)	9	9	93.446	72.574	13.688	13.1
18	17	Borde et al. 2010	Non saline (control)	XXXX	Allium sativum	Amaryllidaceae	Herbaceous	Annual	Forb	Monocots	Moderate (40-60 days)	9	9	94.19	77.981	29.59	14.712
19	18	Campanelli et al. 2013	Moderate salinity ( 100-200 mMNacl or 10-20 dS/m)	Septoglomus viscosum	Medicago sativa	Fabaceae	Herbaceous	Perennial	Forb	Dicots	Moderate (40-60 days)	10	10	78.8	73.3	7	7
19	19	Campanelli et al. 2013	Moderate salinity ( 100-200 mMNacl or 10-20 dS/m)	Septoglomus viscosum	Medicago sativa	Fabaceae	Herbaceous	Perennial	Forb	Dicots	Moderate (40-60 days)	10	10	85.4	80.4	9	8
19	20	Campanelli et al. 2013	Non saline (control)	Septoglomus viscosum	Medicago sativa	Fabaceae	Herbaceous	Perennial	Forb	Dicots	Moderate (40-60 days)	10	10	90.5	85.8	10	8
20	21	Carretero et al. 2008	Low salinity ( <100 mMNacl or <10 dS/m)	Rhizophagus intraradices	Manihot esculenta	Euphorbiaceae	Woody	Annual/Perennial	Shrub	Dicots	Moderate (40-60 days)	3	3	76	64	7	6
20	22	Carretero et al. 2008	Moderate salinity ( 100-200 mMNacl or 10-20 dS/m)	Rhizophagus intraradices	Manihot esculenta	Euphorbiaceae	Woody	Annual/Perennial	Shrub	Dicots	Moderate (40-60 days)	3	3	32	26	3	3
20	23	Carretero et al. 2008	Non saline (control)	Rhizophagus intraradices	Manihot esculenta	Euphorbiaceae	Woody	Annual/Perennial	Shrub	Dicots	Moderate (40-60 days)	3	3	85	85	8	8
20	24	Carretero et al. 2008	Non saline (control)	Rhizophagus intraradices	Manihot esculenta	Euphorbiaceae	Woody	Annual/Perennial	Shrub	Dicots	Moderate (40-60 days)	3	3	84	81	8	8
20	25	Carretero et al. 2008	Non saline (control)	Rhizophagus intraradices	Manihot esculenta	Euphorbiaceae	Woody	Annual/Perennial	Shrub	Dicots	Moderate (40-60 days)	3	3	84	83	8	8
20	26	Carretero et al. 2008	Low salinity ( <100 mMNacl or <10 dS/m)	Rhizophagus intraradices	Manihot esculenta	Euphorbiaceae	Woody	Annual/Perennial	Shrub	Dicots	Moderate (40-60 days)	3	3	72	69	7	7
20	27	Carretero et al. 2008	Low salinity ( <100 mMNacl or <10 dS/m)	Rhizophagus intraradices	Manihot esculenta	Euphorbiaceae	Woody	Annual/Perennial	Shrub	Dicots	Moderate (40-60 days)	3	3	81	68	8	6
20	28	Carretero et al. 2008	Moderate salinity ( 100-200 mMNacl or 10-20 dS/m)	Rhizophagus intraradices	Manihot esculenta	Euphorbiaceae	Woody	Annual/Perennial	Shrub	Dicots	Moderate (40-60 days)	3	3	30	30	3	3
20	29	Carretero et al. 2008	Moderate salinity ( 100-200 mMNacl or 10-20 dS/m)	Rhizophagus intraradices	Manihot esculenta	Euphorbiaceae	Woody	Annual/Perennial	Shrub	Dicots	Moderate (40-60 days)	3	3	54	45	8	4
38	30	Garg and Bhandari, 2016b	Non saline (control)	Funneliformis mosseae	Cicer arietinum	Fabaceae	Herbaceous	Annual	Forb	Dicots	Long (> 60 days)	6	6	92.95	85.08	11.1697	9.33256
38	31	Garg and Bhandari, 2016b	Low salinity ( <100 mMNacl or <10 dS/m)	Funneliformis mosseae	Cicer arietinum	Fabaceae	Herbaceous	Annual	Forb	Dicots	Long (> 60 days)	6	6	66.54	46.22	9.33256	18.6651
38	32	Garg and Bhandari, 2016b	Non saline (control)	Funneliformis mosseae	Cicer arietinum	Fabaceae	Herbaceous	Annual	Forb	Dicots	Long (> 60 days)	6	6	87.87	80.25	6.2217	3.72322
38	33	Garg and Bhandari, 2016b	Low salinity ( <100 mMNacl or <10 dS/m)	Funneliformis mosseae	Cicer arietinum	Fabaceae	Herbaceous	Annual	Forb	Dicots	Long (> 60 days)	6	6	73.66	60.18	5.60933	5.58484
38	34	Garg and Bhandari, 2016b	Low salinity ( <100 mMNacl or <10 dS/m)	Funneliformis mosseae	Cicer arietinum	Fabaceae	Herbaceous	Annual	Forb	Dicots	Long (> 60 days)	6	6	64	54.1	4.97246	8.08332
38	35	Garg and Bhandari, 2016b	Low salinity ( <100 mMNacl or <10 dS/m)	Funneliformis mosseae	Cicer arietinum	Fabaceae	Herbaceous	Annual	Forb	Dicots	Long (> 60 days)	6	6	50.79	37.84	4.36009	5.60933
38	36	Garg and Bhandari, 2016b	Moderate salinity ( 100-200 mMNacl or 10-20 dS/m)	Funneliformis mosseae	Cicer arietinum	Fabaceae	Herbaceous	Annual	Forb	Dicots	Long (> 60 days)	6	6	53.08	38.86	6.2217	4.36009
38	37	Garg and Bhandari, 2016b	Moderate salinity ( 100-200 mMNacl or 10-20 dS/m)	Funneliformis mosseae	Cicer arietinum	Fabaceae	Herbaceous	Annual	Forb	Dicots	Long (> 60 days)	6	6	37.59	25.65	5.60933	4.97246
41	38	Garg and Chandel, 2012	Non saline (control)	Funneliformis mosseae	Cajanus cajan	Fabaceae	Woody	Annual/Perennial	Shrub	Dicots	Moderate (40-60 days)	6	6	62.84	57.94	12.0441	29.8348
41	39	Garg and Chandel, 2012	Non saline (control)	Funneliformis mosseae	Cajanus cajan	Fabaceae	Woody	Annual/Perennial	Shrub	Dicots	Moderate (40-60 days)	6	6	92.08	82.76	6.87792	5.97675
41	40	Garg and Chandel, 2012	Low salinity ( <100 mMNacl or <10 dS/m)	Funneliformis mosseae	Cajanus cajan	Fabaceae	Woody	Annual/Perennial	Shrub	Dicots	Moderate (40-60 days)	6	6	64.86	50.38	5.69996	10.4838
41	41	Garg and Chandel, 2012	Low salinity ( <100 mMNacl or <10 dS/m)	Funneliformis mosseae	Cajanus cajan	Fabaceae	Woody	Annual/Perennial	Shrub	Dicots	Moderate (40-60 days)	6	6	41.4	32.46	5.0582	7.74039
63	42	Garg and Chandel, 2012	Moderate salinity ( 100-200 mMNacl or 10-20 dS/m)	Claroideoglomus etunicatum (isolate EEZ 163)	Oryza sativa L.	Poaceae	Herbaceous	Annual	Grass	Monocot	Moderate(2-4 weeks)	15	15	0.69183	0.717908	0.099923	0.123161
63	43	Garg and Chandel, 2012	Low salinity ( <100 mMNacl or <10 dS/m)	Claroideoglomus etunicatum (isolate EEZ 163)	Oryza sativa L.	Poaceae	Herbaceous	Annual	Grass	Monocot	Moderate(2-4 weeks)	15	15	0.739	0.722582	0.193649	0.232379
63	44	Porcel et al. 2015	Non saline (control)	Claroideoglomus etunicatum (isolate EEZ 163)	Oryza sativa L.	Poaceae	Herbaceous	Annual	Grass	Monocot	Moderate(2-4 weeks)	15	15	0.7304	0.74193	0.193649	0.0735867
74	45	Wu & Zou,2009	Non saline (control)	Funneliformis mosseae	Citrus tangerine	Rutaceae	Woody	Perennial	Tree	Dicots	Long (>4 weeks)	3	3	69.93	64.29	10.5794	10.5794
74	46	Wu & Zou,2009	Non saline (control)	Paraglomus occultum	Citrus tangerine	Rutaceae	Woody	Perennial	Tree	Dicots	Long (>4 weeks)	3	3	72.33	64.29	5.02641	5.02641
74	47	Wu & Zou,2009	Moderate salinity ( 100-200 mMNacl or 10-20 dS/m)	Funneliformis mosseae	Citrus tangerine	Rutaceae	Woody	Perennial	Tree	Dicots	Long (>4 weeks)	3	3	67.6	59.85	4.84455	4.84455
74	48	Wu & Zou,2009	Moderate salinity ( 100-200 mMNacl or 10-20 dS/m)	Paraglomus occultum	Citrus tangerine	Rutaceae	Woody	Perennial	Tree	Dicots	Long (>4 weeks)	3	3	71.16	59.85	7.07196	7.07196
84	49	Wu & Zou,2009	Non saline (control)	G. versiforme	Poncirus trifoliata	Rutaceae	Woody	Perennial	Shrub	Dicots	Long (>4 weeks)	3	3	86.746	80.722	11.274	11.274
84	50	Wu & Zou,2009	Moderate salinity ( 100-200 mMNacl or 10-20 dS/m)	Funneliformis mosseae	Poncirus trifoliata	Rutaceae	Woody	Perennial	Shrub	Dicots	Long (>4 weeks)	3	3	84.337	77.911	12.0263	12.0263
84	51	Wu & Zou,2009	Moderate salinity ( 100-200 mMNacl or 10-20 dS/m)	G. versiforme	Poncirus trifoliata	Rutaceae	Woody	Perennial	Shrub	Dicots	Long (>4 weeks)	3	3	80.722	77.911	6.94976	1.75361
84	52	Zou & Wu, 2011	Non saline (control)	Funneliformis mosseae	Poncirus trifoliata	Rutaceae	Woody	Perennial	Shrub	Dicots	Long (>4 weeks)	3	3	94.779	80.722	8.76928	8.76928
87	53	Zou & Wu, 2011	Moderate salinity ( 100-200 mMNacl or 10-20 dS/m)	Rhizophagus irregularis	Lactuca sativa	Asteraceae	Herbaceous	Annual	Forb	Dicots	Long (>4 weeks)	6	6	93.1365	90.5535	9.03871	19.8852
87	54	Jahromi et al. 2007	Non saline (control)	Rhizophagus irregularis	Lactuca sativa	Asteraceae	Herbaceous	Annual	Forb	Dicots	Long (>4 weeks)	6	6	96.0148	93.2841	9.79796	21.6929
87	55	Jahromi et al. 2007	Low salinity ( <100 mMNacl or <10 dS/m)	Rhizophagus irregularis	Lactuca sativa	Asteraceae	Herbaceous	Annual	Forb	Dicots	Long (>4 weeks)	6	6	92.3247	87.1587	15.7274	3.79626
93	56	Jahromi et al. 2007	High salinity ( >200 mMNaCl or >20 dS/m))	Rhizophagus irregularis	Lactuca sativa	Asteraceae	Herbaceous	Annual	Forb	Dicots	Moderate (2-4 weeks)	5	5	79.2	75.7	10.7701	10.7701
93	57	Jahromi et al. 2007	Moderate salinity ( 100-200 mMNacl or 10-20 dS/m)	Glomus mosseae	Lactuca sativa	Asteraceae	Herbaceous	Annual	Forb	Dicots	Moderate (2-4 weeks)	5	5	87.6	83	13.4164	13.4164
93	58	Jahromi et al. 2007	Non saline (control)	Rhizophagus irregularis	Lactuca sativa	Asteraceae	Herbaceous	Annual	Forb	Dicots	Moderate (2-4 weeks)	5	5	80.6	80	6.15432	6.15432
93	59	Jahromi et al. 2007	High salinity ( >200 mMNaCl or >20 dS/m))	Glomus mosseae	Lactuca sativa	Asteraceae	Herbaceous	Annual	Forb	Dicots	Moderate (2-4 weeks)	5	5	83.5	75.7	7.58319	7.58319
93	60	Kohler et al. 2009	Non saline (control)	Glomus mosseae	Lactuca sativa	Asteraceae	Herbaceous	Annual	Forb	Dicots	Moderate (2-4 weeks)	5	5	77.6	80	9.16993	2.46173
93	61	Kohler et al. 2009	Moderate salinity ( 100-200 mMNacl or 10-20 dS/m)	Rhizophagus irregularis	Lactuca sativa	Asteraceae	Herbaceous	Annual	Forb	Dicots	Moderate (2-4 weeks)	5	5	84.7	83	16.5275	16.5275
95	62	Lin et al. 2017	Non saline (control)	Glomus mosseae	Leymus chinensis	Poaceae	Herbaceous	Perennial	Grass	Monocots	Short (<2 weeks)	6	6	85	85	6.44603	19.3381
95	63	Lin et al. 2017	Moderate salinity ( 100-200 mMNacl or 10-20 dS/m)	Glomus mosseae	Leymus chinensis	Poaceae	Herbaceous	Perennial	Grass	Monocots	Short (<2 weeks)	6	6	82.6316	80	6.44603	19.3381
95	64	Lin et al. 2017	Moderate salinity ( 100-200 mMNacl or 10-20 dS/m)	Glomus mosseae	Leymus chinensis	Poaceae	Herbaceous	Perennial	Grass	Monocots	Short (<2 weeks)	6	6	78.6842	75	6.44603	3.86762
100	65	Lin et al. 2017	Moderate salinity ( 100-200 mMNacl or 10-20 dS/m)	Claroideoglomus etunicatum	Oryza sativa	Poaceae	Herbaceous	Annual	Grass	Monocots	Moderate (2-4 weeks)	15	15	0.718305	0.679083	0.100742	0.123979
100	66	Lin et al. 2017	Low salinity ( <100 mMNacl or <10 dS/m)	Claroideoglomus etunicatum	Oryza sativa	Poaceae	Herbaceous	Annual	Grass	Monocots	Moderate (2-4 weeks)	15	15	0.739355	0.728803	0.20655	0.258351
100	67	Porcel et al. 2015	Non saline (control)	Claroideoglomus etunicatum	Oryza sativa	Poaceae	Herbaceous	Annual	Grass	Monocots	Moderate (2-4 weeks)	15	15	0.730414	0.73919	0.20655	0.0774564
107	68	Sheng et al. 2008	Non saline (control)	Funneliformis mosseae	Zea mays	Poaceae	Herbaceous	Annual	Grass	Monocots	Long (>4 weeks)	5	5	45.3886	45.1376	8.02021	8.02021
107	69	Sheng et al. 2008	Low salinity ( <100 mMNacl or <10 dS/m)	Funneliformis mosseae	Zea mays	Poaceae	Herbaceous	Annual	Grass	Monocots	Long (>4 weeks)	5	5	452.736	419.824	35.0439	35.0439
107	70	Sheng et al. 2008	Low salinity ( <100 mMNacl or <10 dS/m)	Funneliformis mosseae	Zea mays	Poaceae	Herbaceous	Annual	Grass	Monocots	Long (>4 weeks)	5	5	484.496	406.036	76.2792	76.2792
107	71	Sheng et al. 2008	Moderate salinity ( 100-200 mMNacl or 10-20 dS/m)	Funneliformis mosseae	Zea mays	Poaceae	Herbaceous	Annual	Grass	Monocots	Long (>4 weeks)	5	5	522.764	396.203	123.043	123.043
107	72	Sheng et al. 2008	Moderate salinity ( 100-200 mMNacl or 10-20 dS/m)	Funneliformis mosseae	Zea mays	Poaceae	Herbaceous	Annual	Grass	Monocots	Long (>4 weeks)	5	5	617.544	397.311	214.111	214.111
110	73	Tao et al 2012	Low salinity ( <100 mMNacl or <10 dS/m)	Funneliformis mosseae	Suaeda salsa	Amaranthaceae	Herbaceous	Annual	Forb	Dicots	Long (>4 weeks)	5	5	88.02	88.09	12.9692	20.3482
110	74	Tao et al 2012	High salinity ( >200 mMNaCl or >20 dS/m))	Funneliformis mosseae	Suaeda salsa	Amaranthaceae	Herbaceous	Annual	Forb	Dicots	Long (>4 weeks)	5	5	88.19	88.79	16.7705	23.9259
112	75	Tofighi et al 2017	Non saline (control)	Funneliformis mosseae	Triticum aestivum	Poaceae	Herbaceous	Annual	Grass	Monocots	Moderate (2-4 weeks)	4	4	85.3	77.5	9.42	42.84
112	76	Tofighi et al 2017	Moderate salinity ( 100-200 mMNacl or 10-20 dS/m)	Funneliformis mosseae	Triticum aestivum	Poaceae	Herbaceous	Annual	Grass	Monocots	Moderate (2-4 weeks)	4	4	55.8	47.16	6.402	10.332
115	77	Tofighi et al 2017	Moderate salinity ( 100-200 mMNacl or 10-20 dS/m)	Diversispora versiformis	Zelkova serrata	Ulmaceae	Woody	Perennial	Tree	Dicots	Long (>4 weeks)	24	24	75.5062	76.2308	7.64432	8.93296
115	78	Tofighi et al 2017	Moderate salinity ( 100-200 mMNacl or 10-20 dS/m)	Funneliformis mosseae	Zelkova serrata	Ulmaceae	Woody	Perennial	Tree	Dicots	Long (>4 weeks)	24	24	79.7923	76.2308	8.90379	8.93296
115	79	Tofighi et al 2017	Moderate salinity ( 100-200 mMNacl or 10-20 dS/m)	Funneliformis mosseae	Zelkova serrata	Ulmaceae	Woody	Perennial	Tree	Dicots	Long (>4 weeks)	24	24	78.4374	76.2308	8.83571	8.93296
115	80	Wang et al 2019	Non saline (control)	Funneliformis mosseae	Zelkova serrata	Ulmaceae	Woody	Perennial	Tree	Dicots	Long (>4 weeks)	24	24	84.0556	82.5548	17.72	10.1633
115	81	Wang et al 2019	Non saline (control)	Diversispora versiformis	Zelkova serrata	Ulmaceae	Woody	Perennial	Tree	Dicots	Long (>4 weeks)	24	24	87.5457	82.5548	25.3352	10.1633
115	82	Wang et al 2019	Non saline (control)	Funneliformis mosseae	Zelkova serrata	Ulmaceae	Woody	Perennial	Tree	Dicots	Long (>4 weeks)	24	24	83.4541	82.5548	31.7492	10.1633
116	83	Wu and Zou 2009	Non saline (control)	Funneliformis mosseae	Citrus tangerine	Rutaceae	Woody	Perennial	Tree	Dicots	Long (>4 weeks)	3	3	69.93	64.29	10.5799	10.5799
116	84	Wu and Zou 2009	Non saline (control)	Paraglomus occultum	Citrus tangerine	Rutaceae	Woody	Perennial	Tree	Dicots	Long (>4 weeks)	3	3	72.33	64.29	5.02732	5.02732
116	85	Wu and Zou 2009	Moderate salinity ( 100-200 mMNacl or 10-20 dS/m)	Funneliformis mosseae	Citrus tangerine	Rutaceae	Woody	Perennial	Tree	Dicots	Long (>4 weeks)	3	3	67.6	59.85	4.84599	4.84599
116	86	Wu and Zou 2009	Moderate salinity ( 100-200 mMNacl or 10-20 dS/m)	Paraglomus occultum	Citrus tangerine	Rutaceae	Woody	Perennial	Tree	Dicots	Long (>4 weeks)	3	3	71.16	59.85	7.07202	7.07202
119	87	Wu et al 2013	Non saline (control)	Funneliformis mosseae	Poncirus trifoliata	Rutaceae	Woody	Perennial	Tree	Dicots	Long (>4 weeks)	4	4	79.9327	69.7724	15.6866	22.4882
119	88	Wu et al 2013	Moderate salinity ( 100-200 mMNacl or 10-20 dS/m)	Funneliformis mosseae	Poncirus trifoliata	Rutaceae	Woody	Perennial	Tree	Dicots	Long (>4 weeks)	4	4	75.2538	65.2071	7.49746	7.72614
120	89	Wu et al 2013	Non saline (control)	Rhizophagus irregularis	Populus cathayana	Salicaceae	Woody	Perennial	Tree	Dicots	Moderate (2-4 weeks)	15	15	75.5822	69.7772	8.34161	29.219
120	90	Wu et al 2015	Non saline (control)	Rhizophagus irregularis	Populus cathayana	Salicaceae	Woody	Perennial	Tree	Dicots	Moderate (2-4 weeks)	15	15	79.2542	74.5433	15.9263	18.5992
120	91	Wu et al 2015	Low salinity ( <100 mMNacl or <10 dS/m)	Rhizophagus irregularis	Populus cathayana	Salicaceae	Woody	Perennial	Tree	Dicots	Moderate (2-4 weeks)	15	15	69.7196	61.4673	17.7082	16.3803
120	92	Wu et al 2015	Low salinity ( <100 mMNacl or <10 dS/m)	Rhizophagus irregularis	Populus cathayana	Salicaceae	Woody	Perennial	Tree	Dicots	Moderate (2-4 weeks)	15	15	66.0563	58.2407	19.4793	18.3578

## Sheet: MDA
PaperNo.	Study SL	Author	Year	Salinity_level	Mycorrhiza_Species	Mycorrhiza_Genera	Plant_Species	Plant_Family	Plant_Life_Styles	Plant_Lifecycle	Plant_Life_Forms	Plant_Clade	Salinity_duration	Ne	Nc	Me	Se	Mc	Sc
10	1	Asrar et al.	2014	Low	Septoglomus deserticola	Septoglomus	Kalanchoe blossfeldiana	Crassulaceae	Herbaceous	Perennial	Forb	Dicots	Moderate	10	10	39.826	12.6188	47.835	12.6188
10	2	Asrar et al.	2014	Moderate	Septoglomus deserticola	Septoglomus	Kalanchoe blossfeldiana	Crassulaceae	Herbaceous	Perennial	Forb	Dicots	Moderate	10	10	52.597	33.8832	75.108	33.8832
10	3	Asrar et al.	2014	Moderate	Septoglomus deserticola	Septoglomus	Kalanchoe blossfeldiana	Crassulaceae	Herbaceous	Perennial	Forb	Dicots	Moderate	10	10	49.567	12.3802	57.792	12.3802
10	4	Asrar et al.	2014	Non saline	Septoglomus deserticola	Septoglomus	Kalanchoe blossfeldiana	Crassulaceae	Herbaceous	Perennial	Forb	Dicots	Moderate	10	10	35.281	17.2645	46.753	17.2645
14	5	Bharti and Garg	2019	Low	Rhizophagus intraradices	Rhizophagus	Cicer arietinum	Fabaceae	Herbaceous	Annual	Forb	Dicots	Long	6	6	5.87	0.597675	9.701	0.600125
14	6	Bharti and Garg	2019	Low	Rhizophagus intraradices	Rhizophagus	Cicer arietinum	Fabaceae	Herbaceous	Annual	Forb	Dicots	Long	6	6	4.484	0.597675	6.929	0.399267
14	7	Bharti and Garg	2019	Low	Rhizophagus intraradices	Rhizophagus	Cicer arietinum	Fabaceae	Herbaceous	Annual	Forb	Dicots	Long	6	6	0.682	0.0734847	0.902	0.115126
14	8	Bharti and Garg	2019	Low	Rhizophagus intraradices	Rhizophagus	Cicer arietinum	Fabaceae	Herbaceous	Annual	Forb	Dicots	Long	6	6	0.57	0.0587878	0.692	0.0489898
14	9	Bharti and Garg	2019	Non saline	Rhizophagus intraradices	Rhizophagus	Cicer arietinum	Fabaceae	Herbaceous	Annual	Forb	Dicots	Long	6	6	3.22	0.298838	3.628	0.298838
14	10	Bharti and Garg	2019	Non saline	Rhizophagus intraradices	Rhizophagus	Cicer arietinum	Fabaceae	Herbaceous	Annual	Forb	Dicots	Long	6	6	0.334	0.0318434	0.368	0.0244949
15	11	Bharti et al.	2013	High	Funneliformis mosseae	Funneliformis	Mentha arvensis	Lamiaceae	Herbaceous	Perennial	Forb	Dicots	Long	3	3	1.43	0.207846	1.96	0.155885
15	12	Bharti et al.	2013	High	Rhizophagus aggregatum	Rhizophagus	Mentha arvensis	Lamiaceae	Herbaceous	Perennial	Forb	Dicots	Long	3	3	1.43	0.207846	1.96	0.155885
15	13	Bharti et al.	2013	High	Rhizophagus intraradices	Rhizophagus	Mentha arvensis	Lamiaceae	Herbaceous	Perennial	Forb	Dicots	Long	3	3	1.4	0.155885	1.96	0.155885
15	14	Bharti et al.	2013	High	Rhizophagus fasciculatus	Rhizophagus	Mentha arvensis	Lamiaceae	Herbaceous	Perennial	Forb	Dicots	Long	3	3	1.39	0.277128	1.96	0.155885
15	15	Bharti et al.	2013	Non saline	Rhizophagus aggregatum	Rhizophagus	Mentha arvensis	Lamiaceae	Herbaceous	Perennial	Forb	Dicots	Long	3	3	0.92	0.0866025	0.96	0.207846
15	16	Bharti et al.	2013	Non saline	Rhizophagus fasciculatus	Rhizophagus	Mentha arvensis	Lamiaceae	Herbaceous	Perennial	Forb	Dicots	Long	3	3	0.86	0.121244	0.96	0.207846
15	17	Bharti et al.	2013	Non saline	Funneliformis mosseae	Funneliformis	Mentha arvensis	Lamiaceae	Herbaceous	Perennial	Forb	Dicots	Long	3	3	0.84	0.0866025	0.96	0.207846
15	18	Bharti et al.	2013	Non saline	Rhizophagus intraradices	Rhizophagus	Mentha arvensis	Lamiaceae	Herbaceous	Perennial	Forb	Dicots	Long	3	3	0.8	0.121244	0.96	0.207846
32	19	Estrada et al.	2013c	Low	Rhizophagus intraradices	Rhizophagus	Zea mays	Poaceae	Herbaceous	Annual	Grass	Monocots	Short	10	10	23.53	2.24522	21.5	3.35518
32	20	Estrada et al.	2013c	Low	Septoglomus constrictum	Septoglomus	Zea mays	Poaceae	Herbaceous	Annual	Grass	Monocots	Short	10	10	15.54	4.17421	21.5	3.35518
32	21	Estrada et al.	2013c	Low	Rhizophagus intraradices	Rhizophagus	Zea mays	Poaceae	Herbaceous	Annual	Grass	Monocots	Short	10	10	14.59	4.14258	21.5	3.35518
32	22	Estrada et al.	2013c	Low	Claroideoglomus etunicatum	Claroideoglomus	Zea mays	Poaceae	Herbaceous	Annual	Grass	Monocots	Short	10	10	14.51	4.17421	21.5	3.35518
32	23	Estrada et al.	2013c	Moderate	Rhizophagus intraradices	Rhizophagus	Zea mays	Poaceae	Herbaceous	Annual	Grass	Monocots	Short	10	10	22.42	4.80666	23.3	1.26491
32	24	Estrada et al.	2013c	Moderate	Septoglomus constrictum	Septoglomus	Zea mays	Poaceae	Herbaceous	Annual	Grass	Monocots	Short	10	10	19.52	3.38364	23.3	1.26491
32	25	Estrada et al.	2013c	Moderate	Claroideoglomus etunicatum	Claroideoglomus	Zea mays	Poaceae	Herbaceous	Annual	Grass	Monocots	Short	10	10	17.46	1.70763	23.3	1.26491
32	26	Estrada et al.	2013c	Moderate	Rhizophagus intraradices	Rhizophagus	Zea mays	Poaceae	Herbaceous	Annual	Grass	Monocots	Short	10	10	16.5	4.49043	23.3	1.26491
32	27	Estrada et al.	2013c	Non saline	Claroideoglomus etunicatum	Claroideoglomus	Zea mays	Poaceae	Herbaceous	Annual	Grass	Monocots	Short	10	10	14.59	2.24522	9.51	1.70763
32	28	Estrada et al.	2013c	Non saline	Rhizophagus intraradices	Rhizophagus	Zea mays	Poaceae	Herbaceous	Annual	Grass	Monocots	Short	10	10	14.54	3.82636	9.51	1.70763
32	29	Estrada et al.	2013c	Non saline	Rhizophagus intraradices	Rhizophagus	Zea mays	Poaceae	Herbaceous	Annual	Grass	Monocots	Short	10	10	12.62	1.61276	9.51	1.70763
32	30	Estrada et al.	2013c	Non saline	Septoglomus constrictum	Septoglomus	Zea mays	Poaceae	Herbaceous	Annual	Grass	Monocots	Short	10	10	11.62	5.43912	9.51	1.70763
33	31	Evelin and Kapoor	2014	Low	Rhizophagus intraradices	Rhizophagus	Trigonella foenum-graecum	Fabaceae	Herbaceous	Annual	Forb	Dicots	Short	3	3	82.81	11.7321	110.52	10.9053
33	32	Evelin and Kapoor	2014	Moderate	Rhizophagus intraradices	Rhizophagus	Trigonella foenum-graecum	Fabaceae	Herbaceous	Annual	Forb	Dicots	Short	3	3	142.45	11.6801	163.86	11.6974
33	33	Evelin and Kapoor	2014	Moderate	Rhizophagus intraradices	Rhizophagus	Trigonella foenum-graecum	Fabaceae	Herbaceous	Annual	Forb	Dicots	Short	3	3	129.82	10.7667	148.78	14.9053
33	34	Evelin and Kapoor	2014	Non saline	Rhizophagus intraradices	Rhizophagus	Trigonella foenum-graecum	Fabaceae	Herbaceous	Annual	Forb	Dicots	Short	3	3	46.67	4.07846	68.42	3.81865
34	35	Evelin et al.	2012	Low	Rhizophagus intraradices	Rhizophagus	Trigonella foenum-graecum	Fabaceae	Herbaceous	Annual	Forb	Dicots	Short	3	3	82.64	20.76	110.07	10.76
34	36	Evelin et al.	2012	Moderate	Rhizophagus intraradices	Rhizophagus	Trigonella foenum-graecum	Fabaceae	Herbaceous	Annual	Forb	Dicots	Short	3	3	142.47	11.16	163.81	10.75
34	37	Evelin et al.	2012	Moderate	Rhizophagus intraradices	Rhizophagus	Trigonella foenum-graecum	Fabaceae	Herbaceous	Annual	Forb	Dicots	Short	3	3	130.27	11.14	147.8	9.76
34	38	Evelin et al.	2012	Non saline	Rhizophagus intraradices	Rhizophagus	Trigonella foenum-graecum	Fabaceae	Herbaceous	Annual	Forb	Dicots	Short	3	3	46.05	4.91	87.21	5.67
41	39	Garg and Chandel	2012	Low	Funneliformis mosseae	Funneliformis	Cajanus cajan	Fabaceae	Woody	Annual/Perennial	Shrub	Dicots	Moderate	6	6	18.09	4.63688	20.54	4.47522
41	40	Garg and Chandel	2012	Low	Funneliformis mosseae	Funneliformis	Cajanus cajan	Fabaceae	Woody	Annual/Perennial	Shrub	Dicots	Moderate	6	6	11.56	8.32337	14.89	7.35337
41	41	Garg and Chandel	2012	Non saline	Funneliformis mosseae	Funneliformis	Cajanus cajan	Fabaceae	Woody	Annual/Perennial	Shrub	Dicots	Moderate	6	6	11.21	6.2609	2.67	6.37112
41	42	Garg and Chandel	2012	Non saline	Funneliformis mosseae	Funneliformis	Cajanus cajan	Fabaceae	Woody	Annual/Perennial	Shrub	Dicots	Moderate	6	6	8.79	3.35825	10.43	3.72567
47	43	Hajiboland et al.	2010	Low	Rhizophagus intraradices	Rhizophagus	Solanum lycopersicum	Solanaceae	Herbaceous	Annual	Forb	Dicots	Long	4	4	53	3.5	55	2.6
47	44	Hajiboland et al.	2010	Low	Rhizophagus intraradices	Rhizophagus	Solanum lycopersicum	Solanaceae	Herbaceous	Annual	Forb	Dicots	Long	4	4	48	2.4	56	2.5
47	45	Hajiboland et al.	2010	Moderate	Rhizophagus intraradices	Rhizophagus	Solanum lycopersicum	Solanaceae	Herbaceous	Annual	Forb	Dicots	Long	4	4	83	3.7	98	4.7
47	46	Hajiboland et al.	2010	Moderate	Rhizophagus intraradices	Rhizophagus	Solanum lycopersicum	Solanaceae	Herbaceous	Annual	Forb	Dicots	Long	4	4	72	4.3	95	4.3
47	47	Hajiboland et al.	2010	Non saline	Rhizophagus intraradices	Rhizophagus	Solanum lycopersicum	Solanaceae	Herbaceous	Annual	Forb	Dicots	Long	4	4	48	3.3	50	2
47	48	Hajiboland et al.	2010	Non saline	Rhizophagus intraradices	Rhizophagus	Solanum lycopersicum	Solanaceae	Herbaceous	Annual	Forb	Dicots	Long	4	4	46	3.8	51	3.7
49	49	He et al.	2007	Low	Funneliformis mosseae	Funneliformis	Solanum lycopersicum	Solanaceae	Herbaceous	Annual	Forb	Dicots	Long	6	6	3.411	0.210656	4.019	0.210656
49	50	He et al.	2007	Low	Funneliformis mosseae	Funneliformis	Solanum lycopersicum	Solanaceae	Herbaceous	Annual	Forb	Dicots	Long	6	6	2.977	0.475201	3.411	0.475201
49	51	He et al.	2007	Non saline	Funneliformis mosseae	Funneliformis	Solanum lycopersicum	Solanaceae	Herbaceous	Annual	Forb	Dicots	Long	6	6	1.892	0.0465403	1.935	0.318434
50	52	He et al.	2010	Low	Funneliformis mosseae	Funneliformis	Solanum lycopersicum	Solanaceae	Herbaceous	Annual	Forb	Dicots	Long	6	6	12.324	1.45745	16.491	1.45745
50	53	He et al.	2010	Low	Funneliformis mosseae	Funneliformis	Solanum lycopersicum	Solanaceae	Herbaceous	Annual	Forb	Dicots	Long	6	6	10.043	0.969998	11.481	1.33497
50	54	He et al.	2010	Non saline	Funneliformis mosseae	Funneliformis	Solanum lycopersicum	Solanaceae	Herbaceous	Annual	Forb	Dicots	Long	6	6	7.662	1.45745	8.555	1.69995
52	55	Huang et al.	2010	Low	Funneliformis mosseae	Funneliformis	Solanum lycopersicum	Solanaceae	Herbaceous	Annual	Forb	Dicots	Long	10	10	11.126	0.841166	11.685	0.841166
52	56	Huang et al.	2010	Moderate	Funneliformis mosseae	Funneliformis	Solanum lycopersicum	Solanaceae	Herbaceous	Annual	Forb	Dicots	Long	10	10	12.314	6.73565	16.789	6.73565
52	57	Huang et al.	2010	Non saline	Funneliformis mosseae	Funneliformis	Solanum lycopersicum	Solanaceae	Herbaceous	Annual	Forb	Dicots	Long	10	10	7.63	1.3661	8.539	1.3661
55	58	Pandey and Garg	2017	Low	Funneliformis mosseae	Funneliformis	Cajanus cajan	Fabaceae	Herbaceous	Perennial	Shrub	Dicots	Long	6	6	2.55435	0.59906	3.53261	0.798747
55	59	Pandey and Garg	2017	Low	Funneliformis mosseae	Funneliformis	Cajanus cajan	Fabaceae	Herbaceous	Perennial	Shrub	Dicots	Long	6	6	2.44565	0.532498	3.0163	0.532498
55	60	Pandey and Garg	2017	Low	Rhizophagus irregularis	Rhizophagus	Cajanus cajan	Fabaceae	Herbaceous	Perennial	Shrub	Dicots	Long	6	6	1.92935	0.465936	3.53261	0.798747
55	61	Pandey and Garg	2017	Low	Funneliformis mosseae	Funneliformis	Cajanus cajan	Fabaceae	Herbaceous	Perennial	Shrub	Dicots	Long	6	6	1.91892	0.397215	2.72973	0.26481
55	62	Pandey and Garg	2017	Low	Funneliformis mosseae	Funneliformis	Cajanus cajan	Fabaceae	Herbaceous	Perennial	Shrub	Dicots	Long	6	6	1.91892	0.397215	3.13514	0.331012
55	63	Pandey and Garg	2017	Low	Rhizophagus irregularis	Rhizophagus	Cajanus cajan	Fabaceae	Herbaceous	Perennial	Shrub	Dicots	Long	6	6	1.7663	0.532498	3.0163	0.532498
55	64	Pandey and Garg	2017	Low	Rhizophagus irregularis	Rhizophagus	Cajanus cajan	Fabaceae	Herbaceous	Perennial	Shrub	Dicots	Long	6	6	1.54054	0.397215	2.72973	0.26481
55	65	Pandey and Garg	2017	Low	Rhizophagus irregularis	Rhizophagus	Cajanus cajan	Fabaceae	Herbaceous	Perennial	Shrub	Dicots	Long	6	6	1.48649	0.331012	3.13514	0.331012
55	66	Pandey and Garg	2017	Moderate	Funneliformis mosseae	Funneliformis	Cajanus cajan	Fabaceae	Herbaceous	Perennial	Shrub	Dicots	Long	6	6	2.6087	0.399373	3.99457	0.798747
55	67	Pandey and Garg	2017	Moderate	Rhizophagus irregularis	Rhizophagus	Cajanus cajan	Fabaceae	Herbaceous	Perennial	Shrub	Dicots	Long	6	6	1.9837	0.532498	3.99457	0.798747
55	68	Pandey and Garg	2017	Moderate	Funneliformis mosseae	Funneliformis	Cajanus cajan	Fabaceae	Herbaceous	Perennial	Shrub	Dicots	Long	6	6	1.86486	0.397215	3.43243	0.331012
55	69	Pandey and Garg	2017	Moderate	Rhizophagus irregularis	Rhizophagus	Cajanus cajan	Fabaceae	Herbaceous	Perennial	Shrub	Dicots	Long	6	6	1.37838	0.331012	3.43243	0.331012
55	70	Pandey and Garg	2017	Non saline	Rhizophagus irregularis	Rhizophagus	Cajanus cajan	Fabaceae	Herbaceous	Perennial	Shrub	Dicots	Long	6	6	1.84783	0.332811	1.63043	0.133124
55	71	Pandey and Garg	2017	Non saline	Funneliformis mosseae	Funneliformis	Cajanus cajan	Fabaceae	Herbaceous	Perennial	Shrub	Dicots	Long	6	6	1.7663	0.332811	1.63043	0.133124
55	72	Pandey and Garg	2017	Non saline	Rhizophagus irregularis	Rhizophagus	Cajanus cajan	Fabaceae	Herbaceous	Perennial	Shrub	Dicots	Long	6	6	1.64865	0.198607	1.78378	0.595822
55	73	Pandey and Garg	2017	Non saline	Funneliformis mosseae	Funneliformis	Cajanus cajan	Fabaceae	Herbaceous	Perennial	Shrub	Dicots	Long	6	6	1.45946	0.198607	1.78378	0.595822
68	74	ZhongQun et al.	2010	High	Funneliformis mosseae	Funneliformis	Solanum lycopersicum	Solanaceae	Herbaceous	Annual	Forb	Dicots	Long	6	6	12.444	1.63136	16.592	1.26884
68	75	ZhongQun et al.	2010	High	Funneliformis mosseae	Funneliformis	Solanum lycopersicum	Solanaceae	Herbaceous	Annual	Forb	Dicots	Long	6	6	9.851	1.08757	11.333	1.63136
68	76	ZhongQun et al.	2010	Non saline	Funneliformis mosseae	Funneliformis	Solanum lycopersicum	Solanaceae	Herbaceous	Annual	Forb	Dicots	Long	6	6	7.555	1.4501	8.592	1.63136
80	77	Latefa and Chaoxingb	2011	Low	Funneliformis mosseae	Funneliformis	Solanum lycopersicum	Solanaceae	Herbaceous	Annual	Forb	Dicots	Long	6	6	81.1594	4.73331	105.314	9.46663
80	78	Latefa and Chaoxingb	2011	Moderate	Funneliformis mosseae	Funneliformis	Solanum lycopersicum	Solanaceae	Herbaceous	Annual	Forb	Dicots	Long	6	6	84.058	7.09997	122.319	17.1
80	79	Latefa and Chaoxingb	2011	Non saline	Funneliformis mosseae	Funneliformis	Solanum lycopersicum	Solanaceae	Herbaceous	Annual	Forb	Dicots	Long	6	6	67.6329	4.73331	78.2609	4.73331
83	80	Pandey and Garg	2017	Low	Funneliformis mosseae	Funneliformis	Cajanus cajan	Fabaceae	Woody	Annual/Perennial	Shrub	Dicots	Long	6	6	2.58664	0.406297	3.51067	0.696509
83	81	Pandey and Garg	2017	Low	Funneliformis mosseae	Funneliformis	Cajanus cajan	Fabaceae	Woody	Annual/Perennial	Shrub	Dicots	Long	6	6	2.40367	0.580172	3.01976	0.522634
83	82	Pandey and Garg	2017	Low	Rhizophagus irregularis	Rhizophagus	Cajanus cajan	Fabaceae	Woody	Annual/Perennial	Shrub	Dicots	Long	6	6	1.97045	0.522381	3.51067	0.696509
83	83	Pandey and Garg	2017	Low	Funneliformis mosseae	Funneliformis	Cajanus cajan	Fabaceae	Woody	Annual/Perennial	Shrub	Dicots	Long	6	6	1.96736	0.697013	3.03367	0.23217
83	84	Pandey and Garg	2017	Low	Rhizophagus irregularis	Rhizophagus	Cajanus cajan	Fabaceae	Woody	Annual/Perennial	Shrub	Dicots	Long	6	6	1.88247	0.231917	3.01976	0.522634
83	85	Pandey and Garg	2017	Low	Funneliformis mosseae	Funneliformis	Cajanus cajan	Fabaceae	Woody	Annual/Perennial	Shrub	Dicots	Long	6	6	1.83219	0.463582	2.59025	0.406549
83	86	Pandey and Garg	2017	Low	Rhizophagus irregularis	Rhizophagus	Cajanus cajan	Fabaceae	Woody	Annual/Perennial	Shrub	Dicots	Long	6	6	1.40546	0.522381	2.59025	0.406549
83	87	Pandey and Garg	2017	Low	Rhizophagus irregularis	Rhizophagus	Cajanus cajan	Fabaceae	Woody	Annual/Perennial	Shrub	Dicots	Long	6	6	1.32768	0.464339	3.03367	0.23217
83	88	Pandey and Garg	2017	Moderate	Funneliformis mosseae	Funneliformis	Cajanus cajan	Fabaceae	Woody	Annual/Perennial	Shrub	Dicots	Long	6	6	2.55615	0.464591	3.97789	0.638466
83	89	Pandey and Garg	2017	Moderate	Rhizophagus irregularis	Rhizophagus	Cajanus cajan	Fabaceae	Woody	Annual/Perennial	Shrub	Dicots	Long	6	6	1.91647	0.638466	3.97789	0.638466
83	90	Pandey and Garg	2017	Moderate	Funneliformis mosseae	Funneliformis	Cajanus cajan	Fabaceae	Woody	Annual/Perennial	Shrub	Dicots	Long	6	6	1.7711	0.464591	3.33502	0.348507
83	91	Pandey and Garg	2017	Moderate	Rhizophagus irregularis	Rhizophagus	Cajanus cajan	Fabaceae	Woody	Annual/Perennial	Shrub	Dicots	Long	6	6	1.24979	0.522634	3.33502	0.348507
83	92	Pandey and Garg	2017	Non saline	Funneliformis mosseae	Funneliformis	Cajanus cajan	Fabaceae	Woody	Annual/Perennial	Shrub	Dicots	Long	6	6	1.72309	0.116337	1.96015	0.406297
83	93	Pandey and Garg	2017	Non saline	Rhizophagus irregularis	Rhizophagus	Cajanus cajan	Fabaceae	Woody	Annual/Perennial	Shrub	Dicots	Long	6	6	1.53363	0.23217	1.96015	0.406297
83	94	Pandey and Garg	2017	Non saline	Funneliformis mosseae	Funneliformis	Cajanus cajan	Fabaceae	Woody	Annual/Perennial	Shrub	Dicots	Long	6	6	1.50663	0.290464	1.7438	0.522634
83	95	Pandey and Garg	2017	Non saline	Rhizophagus irregularis	Rhizophagus	Cajanus cajan	Fabaceae	Woody	Annual/Perennial	Shrub	Dicots	Long	6	6	1.29327	0.348759	1.7438	0.522634
91	96	Shekoofeh et al.	2012	Low	Rhizophagus irregularis	Rhizophagus	Ocimum basilicum	Lamiaceae	Herbaceous	Annual/Perennial	Forb	Dicots	Short	4	4	6.81793	4.19493	16.2421	8.19493
91	97	Shekoofeh et al.	2012	Low	Funneliformis mosseae	Funneliformis	Ocimum basilicum	Lamiaceae	Herbaceous	Annual/Perennial	Forb	Dicots	Short	4	4	6.47992	1.48885	16.2421	8.48885
91	98	Shekoofeh et al.	2012	Moderate	Rhizophagus irregularis	Rhizophagus	Ocimum basilicum	Lamiaceae	Herbaceous	Annual/Perennial	Forb	Dicots	Short	4	4	7.53996	1.02593	19.0698	10.0259
91	99	Shekoofeh et al.	2012	Moderate	Funneliformis mosseae	Funneliformis	Ocimum basilicum	Lamiaceae	Herbaceous	Annual/Perennial	Forb	Dicots	Short	4	4	7.29006	1.24324	19.0698	10.2432
91	100	Shekoofeh et al.	2012	Non saline	Rhizophagus irregularis	Rhizophagus	Ocimum basilicum	Lamiaceae	Herbaceous	Annual/Perennial	Forb	Dicots	Short	4	4	4.42846	1.56929	2.62378	1.56929
91	101	Shekoofeh et al.	2012	Non saline	Funneliformis mosseae	Funneliformis	Ocimum basilicum	Lamiaceae	Herbaceous	Annual/Perennial	Forb	Dicots	Short	4	4	3.56374	0.817357	2.62378	0.817357
96	102	Tofighi et al.	2017	Moderate	Funneliformis mosseae	Funneliformis	Triticum aestivum	Poaceae	Herbaceous	Annual	Grass	Monocots	Moderate	4	4	1.91753	0.103093	2.28866	0.0824742
96	103	Tofighi et al.	2017	Non saline	Funneliformis mosseae	Funneliformis	Triticum aestivum	Poaceae	Herbaceous	Annual	Grass	Monocots	Moderate	4	4	1.48454	0.0618557	1.70103	0.0412371
101	104	Wu et al.	2010	Moderate	Funneliformis mosseae	Funneliformis	Poncirus trifoliata	Rutaceae	Woody	Perennial	Tree	Dicots	Long	4	4	0.300329	0.0265007	0.33266	0.0265007
101	105	Wu et al.	2010	Moderate	Diversispora versiformis	Diversispora	Poncirus trifoliata	Rutaceae	Woody	Perennial	Tree	Dicots	Long	4	4	0.271666	0.0499944	0.33266	0.0499944
101	106	Wu et al.	2010	Non saline	Funneliformis mosseae	Funneliformis	Poncirus trifoliata	Rutaceae	Woody	Perennial	Tree	Dicots	Long	4	4	0.181857	0.0366262	0.226541	0.0366262
101	107	Wu et al.	2010	Non saline	Diversispora versiformis	Diversispora	Poncirus trifoliata	Rutaceae	Woody	Perennial	Tree	Dicots	Long	4	4	0.167994	0.0479898	0.226541	0.0479898

[truncated: 14 more sheets: POD, SOD, Proline, SS, Ca, K, Na, P, N, Chla, Chlb, FvFm, Pn, Gs]
